# Supplementary material for: Last Millennium Volcanic Forcing and Climate Response using SO 2 Emissions
Source: Copernicus journal article supplement (doi:10.5194/egusphere-2024-1322), 2024-06-03
Supplement: Supplementary file 1 [file Marshall_et_al_2024_Data.xlsx]

## Sheet: SAOD 550 nm - Global and NH
Date	UKESM1 r1 global	UKESM1 r2 global	UKESM1 r3 global	UKESM1 r1 NH	UKESM1 r2 NH	UKESM1 r3 NH	CESM2(WACCM6ma) global	CESM2(WACCM6ma) NH	MRI-ESM2 global	MRI-ESM2 NH
1250-01	0.00152498	0.00135045	0.00141167	0.00198694	0.00180803	0.00178686	0.00281583	0.00350959	0.000845487	0.000605012
1250-02	0.00150332	0.00132747	0.00141889	0.00200692	0.00179639	0.00184592	0.00281601	0.00351315	0.000972584	0.00070064
1250-03	0.00146986	0.00132265	0.00139922	0.00190406	0.00177908	0.0018122	0.00283875	0.00358173	0.00094258	0.000802624
1250-04	0.00144137	0.00127944	0.00138492	0.00175194	0.00158524	0.00174271	0.00290677	0.00360535	0.000941472	0.000863246
1250-05	0.00142146	0.00122831	0.00133984	0.00155474	0.00130254	0.0015198	0.00295956	0.0034617	0.000889478	0.000936531
1250-06	0.00139846	0.00124015	0.00133866	0.00135582	0.00113422	0.00130863	0.0030776	0.00351459	0.000920769	0.00126836
1250-07	0.00137644	0.00127229	0.00135375	0.00123154	0.00105709	0.00118413	0.00296514	0.00303173	0.000998821	0.00123497
1250-08	0.00136713	0.00132185	0.00136622	0.00119908	0.00106964	0.0011548	0.00285017	0.00276322	0.00116307	0.00168912
1250-09	0.00135621	0.00138371	0.0013907	0.00119558	0.00117692	0.0012133	0.0027581	0.00260592	0.00113349	0.00132585
1250-10	0.00136889	0.00140676	0.00137755	0.00129817	0.00134384	0.00133752	0.00275137	0.00267322	0.000866312	0.000935975
1250-11	0.00138429	0.00143056	0.00140024	0.00149441	0.00154462	0.00154846	0.00282978	0.00287456	0.000757504	0.000609893
1250-12	0.00139507	0.00144469	0.00142323	0.0016487	0.00172659	0.00173693	0.00287904	0.00305013	0.000696942	0.000538037
1251-01	0.0014152	0.00144718	0.00143221	0.00178793	0.00183817	0.00184495	0.00292907	0.00329146	0.000718403	0.000455659
1251-02	0.00142431	0.00146629	0.00140421	0.00183125	0.00188806	0.00185772	0.0028827	0.00336208	0.000902018	0.000564394
1251-03	0.00140622	0.00143253	0.00138878	0.00181975	0.00180768	0.00182602	0.00296044	0.0035342	0.00095941	0.000667176
1251-04	0.00138646	0.0013713	0.001377	0.00172512	0.00161218	0.00172058	0.00305792	0.00379532	0.00118889	0.00103654
1251-05	0.00135925	0.00133011	0.00132165	0.00152113	0.00138447	0.0014342	0.00317134	0.00388156	0.000899372	0.000984079
1251-06	0.00135358	0.00135911	0.00133423	0.00129963	0.00124735	0.00125264	0.00315027	0.00355078	0.000926612	0.00121443
1251-07	0.00138028	0.00136943	0.00139363	0.00121434	0.0011561	0.00121975	0.00309316	0.00324205	0.0010313	0.00117174
1251-08	0.00140115	0.00134615	0.00142192	0.00119748	0.00111914	0.0012396	0.00297157	0.00297667	0.00113409	0.00129678
1251-09	0.00143525	0.00133951	0.00143436	0.00125985	0.00116618	0.00129875	0.00293311	0.00287278	0.00100212	0.00124601
1251-10	0.00146323	0.00135964	0.00144101	0.00140766	0.00128764	0.0014312	0.0028837	0.0029008	0.000768061	0.000823152
1251-11	0.00150303	0.00138805	0.00145011	0.001649	0.00147827	0.00160296	0.00288274	0.00309354	0.000808803	0.000776596
1251-12	0.00153395	0.00138897	0.00144479	0.00184882	0.00166036	0.00175459	0.00295584	0.00348948	0.000805829	0.000512417
1252-01	0.00149607	0.00139562	0.00143484	0.00190481	0.00185086	0.0018769	0.0030478	0.00400454	0.000863649	0.000565422
1252-02	0.00146311	0.0013903	0.00142718	0.001936	0.00190177	0.00188258	0.00302266	0.00405986	0.000863189	0.00058726
1252-03	0.00142702	0.00134308	0.00139526	0.00184052	0.00181068	0.00176782	0.00306062	0.00422518	0.00103528	0.000944014
1252-04	0.00137948	0.00129816	0.00137568	0.00166429	0.00165091	0.00162613	0.00311795	0.00429385	0.00107139	0.00107254
1252-05	0.00135631	0.00128153	0.00134563	0.00146195	0.0014878	0.00143203	0.00323618	0.00433586	0.000966411	0.000990552
1252-06	0.00137177	0.00130586	0.00135469	0.00131387	0.00132225	0.00130125	0.00324526	0.00398285	0.000943419	0.0012189
1252-07	0.00140659	0.00132153	0.00134652	0.00127037	0.00123383	0.00119826	0.00312837	0.00351741	0.00107066	0.00139413
1252-08	0.00143135	0.00133652	0.00133251	0.00126727	0.00116918	0.00114322	0.00297365	0.00319147	0.00120164	0.00150392
1252-09	0.0014345	0.00136288	0.00133908	0.00133317	0.00122	0.00116984	0.00290561	0.00304198	0.00109825	0.00135944
1252-10	0.00143017	0.00139007	0.00134569	0.00143279	0.00133503	0.00128224	0.00284546	0.00308996	0.000893466	0.000960683
1252-11	0.00144902	0.0014359	0.00138274	0.00162275	0.00149721	0.00147408	0.00287368	0.00320458	0.000757003	0.000481991
1252-12	0.00146644	0.00145125	0.00139412	0.00180696	0.00169011	0.00166366	0.00286355	0.00336503	0.000775702	0.000707363
1253-01	0.00148901	0.00141224	0.00139456	0.00196662	0.00180084	0.00183153	0.00295186	0.00374779	0.000794151	0.000536875
1253-02	0.00149105	0.0013511	0.00132391	0.00198123	0.00181364	0.00178195	0.00292983	0.00385919	0.000896546	0.000699635
1253-03	0.00145192	0.00129725	0.00128608	0.00182625	0.00173473	0.001745	0.00290383	0.00396513	0.00110976	0.00122587
1253-04	0.00139606	0.00127195	0.00126714	0.00164332	0.00159562	0.00172361	0.00300105	0.00420101	0.00102343	0.00100999
1253-05	0.00137097	0.00128334	0.0012273	0.00146169	0.00140779	0.00149945	0.00309996	0.00424638	0.00088537	0.00095741
1253-06	0.00138518	0.00133098	0.00124958	0.00128281	0.00123634	0.00132898	0.00315596	0.00398432	0.00107773	0.00133623
1253-07	0.00141439	0.00137736	0.00123727	0.00120689	0.00114116	0.0012011	0.00302602	0.00348839	0.00118923	0.0015561
1253-08	0.00140259	0.00139475	0.0012323	0.00118106	0.0011278	0.00114116	0.00289091	0.00312077	0.00117475	0.0014931
1253-09	0.00140501	0.00142803	0.00124815	0.00119961	0.00118888	0.00115281	0.00281758	0.00298032	0.00111062	0.00133726
1253-10	0.00137285	0.00143456	0.00124971	0.00129075	0.00135304	0.00122126	0.00281963	0.00302593	0.000859414	0.000930536
1253-11	0.00137484	0.00141847	0.0012706	0.0014706	0.00151644	0.00137302	0.00287087	0.00321272	0.000761997	0.000584984
1253-12	0.00139712	0.00144583	0.00127891	0.00166053	0.00172328	0.00155268	0.00284261	0.00346428	0.000779319	0.000705271
1254-01	0.00140967	0.00144699	0.00130606	0.00181481	0.00186184	0.00178837	0.00287896	0.00372518	0.000807747	0.000615108
1254-02	0.00135973	0.00143877	0.00131163	0.00173078	0.00190295	0.00182262	0.0028681	0.00377488	0.000856539	0.000611654
1254-03	0.00133225	0.00143227	0.00129669	0.00164298	0.00188794	0.00175909	0.00292173	0.00391582	0.000911479	0.000820739
1254-04	0.00133573	0.0014359	0.00128262	0.00158606	0.00182061	0.00160947	0.00303499	0.004141	0.00102705	0.00103328
1254-05	0.00133901	0.00139967	0.00127156	0.00146289	0.00158454	0.00139202	0.00320195	0.0043489	0.000871126	0.000903346
1254-06	0.00132473	0.00140826	0.00132373	0.0013048	0.00140652	0.00122574	0.00326918	0.00400564	0.000894953	0.00111288
1254-07	0.00129799	0.00141995	0.00136989	0.0011631	0.0013023	0.00113154	0.00312591	0.0035042	0.00104271	0.00133281
1254-08	0.00128188	0.00141565	0.00140261	0.0011069	0.00126542	0.00114501	0.00303203	0.00333501	0.00129658	0.00154686
1254-09	0.00127756	0.00142411	0.00144471	0.00109753	0.00131311	0.0012402	0.00295031	0.00320678	0.00113328	0.00139338
1254-10	0.0012741	0.0014325	0.00144893	0.00120327	0.00145857	0.00137782	0.00285539	0.00320379	0.000792493	0.000893462
1254-11	0.00129841	0.00145415	0.0014503	0.00134404	0.00161075	0.00154838	0.00287081	0.00337326	0.000729327	0.000688635
1254-12	0.00133673	0.00147755	0.00147322	0.00153718	0.00179145	0.00172268	0.00287128	0.00352138	0.000781169	0.000576136
1255-01	0.00133794	0.00147537	0.00150461	0.00165751	0.00192697	0.00190958	0.00288819	0.00363877	0.000755126	0.000498505
1255-02	0.00132188	0.00143946	0.00151542	0.0017331	0.00193452	0.00197545	0.00287237	0.00369593	0.000810394	0.000595265
1255-03	0.00130224	0.00136731	0.00148959	0.00172201	0.00181014	0.00191194	0.00290252	0.0036984	0.0010478	0.001209
1255-04	0.00128597	0.00132084	0.00145897	0.00165457	0.00166021	0.00181432	0.00300249	0.00382557	0.000926727	0.000946698
1255-05	0.0012684	0.00127198	0.00142515	0.00151151	0.0014547	0.00160317	0.00310166	0.00391956	0.000968375	0.00115555
1255-06	0.00127932	0.00127134	0.00141848	0.00138395	0.00128692	0.00142672	0.00315352	0.0036468	0.000865015	0.00122032
1255-07	0.00129417	0.00129566	0.00139727	0.00130066	0.00120319	0.00127942	0.00308009	0.00325113	0.00106209	0.00124516
1255-08	0.00129252	0.00128723	0.0013719	0.00125362	0.00115105	0.00122418	0.00296089	0.00296951	0.00119364	0.00155189
1255-09	0.00131172	0.00127883	0.00135158	0.00123542	0.0011469	0.00125258	0.00286485	0.00282183	0.000974358	0.0010773
1255-10	0.00132321	0.00127386	0.00135916	0.00133113	0.00125224	0.00137551	0.00280947	0.00273109	0.000916194	0.000989244
1255-11	0.00134188	0.00128463	0.00138293	0.00146852	0.00140701	0.00156679	0.00280869	0.00287791	0.000756031	0.000681001
1255-12	0.00140916	0.00130721	0.00141576	0.00170156	0.00159336	0.00175144	0.00287557	0.00322131	0.00070587	0.000499961
1256-01	0.00144175	0.00129233	0.00142552	0.00188802	0.00163781	0.00189428	0.00291177	0.00349892	0.000835255	0.000540451
1256-02	0.00148221	0.00128322	0.0013577	0.00197835	0.00163072	0.00179445	0.00292799	0.0035903	0.00103415	0.000676157
1256-03	0.00149068	0.00126219	0.00130558	0.00194296	0.00156932	0.00169334	0.00289954	0.00362758	0.00109651	0.000768327
1256-04	0.00150637	0.00123935	0.00127078	0.00181434	0.00149494	0.00154796	0.00304555	0.00394966	0.00103377	0.00098224
1256-05	0.00149607	0.0012292	0.00126325	0.00161318	0.00136053	0.0013924	0.00315174	0.00394793	0.00101563	0.00120039
1256-06	0.00150563	0.00122926	0.00127399	0.00145884	0.00122032	0.00125388	0.00315757	0.0036939	0.00100258	0.00135256
1256-07	0.00149532	0.001243	0.00128772	0.00131233	0.00113021	0.00118571	0.00306731	0.00330087	0.00106551	0.00133689
1256-08	0.0014937	0.00124128	0.00129102	0.00125495	0.0010908	0.00120906	0.00296312	0.00301294	0.00121896	0.00148772
1256-09	0.00149041	0.0012728	0.0013037	0.00129444	0.00109987	0.00125637	0.00286842	0.00291144	0.00108735	0.00145504
1256-10	0.00151294	0.00130143	0.00134445	0.00140876	0.00120395	0.00134936	0.00281241	0.00290001	0.000861646	0.000961083
1256-11	0.00151549	0.00132616	0.00138092	0.00156347	0.00138015	0.00150632	0.002859	0.00314577	0.000753863	0.000608674
1256-12	0.00153387	0.00138183	0.00139748	0.00174266	0.00163976	0.00169827	0.00297179	0.00354902	0.000708973	0.000538727
1257-01	0.0015484	0.00141592	0.00136276	0.00196734	0.00180133	0.00174561	0.00300758	0.00385387	0.000792195	0.00057652
1257-02	0.00148898	0.00141368	0.00129641	0.00189924	0.00178127	0.00166955	0.00301778	0.00405245	0.000877389	0.000688377
1257-03	0.00142589	0.00137418	0.00126909	0.00179208	0.00175147	0.00161773	0.00306593	0.00426451	0.00090853	0.000709804
1257-04	0.00135815	0.00134873	0.00123224	0.00163002	0.0016452	0.00150251	0.00314516	0.00441084	0.00103615	0.000914749
1257-05	0.00132575	0.00131023	0.00122003	0.00143031	0.00143651	0.00131219	0.00318258	0.00424073	0.000834695	0.00084733
1257-06	0.00131062	0.00133532	0.00125497	0.00129669	0.00132671	0.00119774	0.00321169	0.00390191	0.0009543	0.00133133
1257-07	0.0571524	0.0433524	0.0377951	0.00341675	0.00476829	0.0017025	0.041491	0.00435335	0.168392	0.00668776
1257-08	0.473671	0.447803	0.389375	0.0292189	0.0632748	0.0212109	0.330676	0.0207697	0.424264	0.0133123
1257-09	0.910671	0.946086	0.814061	0.0605714	0.131953	0.0471885	0.661679	0.0775232	0.582966	0.0192306
1257-10	1.08769	1.13092	0.990584	0.149238	0.266189	0.0754194	0.886892	0.166567	0.680371	0.0427719
1257-11	1.05073	1.11706	0.987992	0.278031	0.475103	0.120784	1.0134	0.35883	0.735225	0.102365
1257-12	0.969112	1.0017	0.917595	0.413481	0.597202	0.212803	1.07865	0.666626	0.762328	0.194623
1258-01	0.857722	0.870237	0.833083	0.44487	0.645269	0.31778	1.11003	0.894705	0.771523	0.27441
1258-02	0.730425	0.768492	0.75496	0.454356	0.645879	0.386596	1.13132	1.046	0.771903	0.349692
1258-03	0.630769	0.678994	0.689425	0.426714	0.616786	0.394181	1.15133	1.15589	0.768972	0.413831
1258-04	0.557816	0.586049	0.62429	0.382889	0.527477	0.385948	1.17254	1.21752	0.766329	0.43078
1258-05	0.491682	0.511323	0.55036	0.326009	0.419517	0.353381	1.18818	1.20565	0.787039	0.423966
1258-06	0.415307	0.439179	0.478279	0.260476	0.327716	0.308405	1.19143	1.16952	0.797711	0.410552
1258-07	0.343942	0.368251	0.409646	0.210303	0.260814	0.265111	1.18111	1.12633	0.795821	0.399449
1258-08	0.284499	0.309181	0.344502	0.176501	0.219049	0.23317	1.15484	1.09391	0.771356	0.389167
1258-09	0.236303	0.260708	0.291543	0.159821	0.199412	0.219853	1.12318	1.09644	0.72112	0.386687
1258-10	0.197694	0.219119	0.248184	0.152888	0.189276	0.216869	1.09325	1.12319	0.644679	0.390724
1258-11	0.166058	0.186145	0.210999	0.14087	0.180381	0.207813	1.06033	1.16908	0.590673	0.394586
1258-12	0.140189	0.15505	0.178211	0.1271	0.161929	0.190102	1.01351	1.18847	0.55325	0.400276
1259-01	0.11613	0.130132	0.148341	0.105731	0.142042	0.162733	0.955168	1.18712	0.523097	0.407998
1259-02	0.0971805	0.10799	0.123246	0.0860855	0.115393	0.132582	0.886658	1.13859	0.492672	0.399754
1259-03	0.0821906	0.089528	0.103074	0.0665232	0.0885269	0.104699	0.812516	1.02285	0.452486	0.359771
1259-04	0.0714713	0.0756509	0.0877612	0.0548154	0.0702113	0.0819264	0.74804	0.908251	0.405953	0.308762
1259-05	0.0617236	0.0637185	0.0752219	0.0451413	0.0544733	0.0654125	0.695237	0.804718	0.375	0.269652
1259-06	0.0523804	0.0540125	0.063734	0.0359354	0.04309	0.0522743	0.646688	0.689084	0.358596	0.233589
1259-07	0.044482	0.0458951	0.0543297	0.0292164	0.0343918	0.042404	0.593621	0.578334	0.331807	0.200542
1259-08	0.0380171	0.0396978	0.0467305	0.0246033	0.0293391	0.036064	0.54074	0.499878	0.295161	0.17542
1259-09	0.0332469	0.0352088	0.0403775	0.0223317	0.0274129	0.0329134	0.499453	0.466434	0.255459	0.160436
1259-10	0.0293517	0.0319479	0.035871	0.0216327	0.0268991	0.0318002	0.464154	0.460484	0.216933	0.150567
1259-11	0.0265788	0.0290063	0.0321382	0.0218977	0.0267283	0.0310602	0.429996	0.464499	0.189487	0.146143
1259-12	0.0234754	0.0263005	0.0284985	0.0216811	0.0267858	0.030115	0.398407	0.464552	0.170873	0.148017
1260-01	0.021312	0.0234376	0.0254585	0.0214952	0.025309	0.0295653	0.364251	0.452051	0.155874	0.147591
1260-02	0.0233974	0.0250787	0.0263675	0.0313544	0.0341536	0.035092	0.335826	0.438076	0.143714	0.143469
1260-03	0.0261778	0.027721	0.0280396	0.0407992	0.042791	0.0421163	0.309697	0.413947	0.129572	0.13213
1260-04	0.027359	0.0292607	0.0293016	0.0454853	0.0471593	0.0479606	0.286926	0.38114	0.115405	0.113662
1260-05	0.026213	0.0296607	0.029257	0.0429292	0.0488431	0.0487741	0.264127	0.33743	0.104405	0.0995425
1260-06	0.0250174	0.0265385	0.0273302	0.0390864	0.0399245	0.043276	0.239163	0.279843	0.0988542	0.0879872
1260-07	0.0222979	0.0237889	0.0245153	0.0307588	0.0318311	0.0354054	0.213163	0.229383	0.098287	0.076528
1260-08	0.020858	0.0226356	0.0223438	0.026936	0.029427	0.0298764	0.190093	0.195428	0.089292	0.0674534
1260-09	0.0206109	0.0226422	0.021355	0.0274236	0.0312788	0.0285846	0.171568	0.176993	0.0752047	0.0617571
1260-10	0.0209243	0.0223895	0.0207271	0.0303762	0.032968	0.0288303	0.153279	0.167497	0.0630328	0.0603034
1260-11	0.0200845	0.0212104	0.0204007	0.0312076	0.0328661	0.0308372	0.136569	0.159067	0.0571425	0.0599638
1260-12	0.0190673	0.0199113	0.0199074	0.031257	0.0327969	0.0321705	0.120351	0.147823	0.0522176	0.0604793
1261-01	0.0177368	0.0184003	0.0189657	0.0304478	0.0322793	0.0323952	0.103259	0.131566	0.0471802	0.0580127
1261-02	0.0159095	0.0163666	0.017272	0.0278818	0.0289036	0.0299392	0.0881449	0.117628	0.0416544	0.0526197
1261-03	0.0133983	0.0134404	0.0148749	0.0226033	0.0224581	0.0248024	0.0758267	0.100283	0.0361833	0.0457998
1261-04	0.0112543	0.0113124	0.0132162	0.017707	0.0177075	0.0208971	0.0662145	0.0860563	0.0310953	0.0379268
1261-05	0.00994037	0.0100406	0.0117698	0.0142601	0.0148702	0.0170974	0.0591428	0.0733024	0.0270557	0.0313472
1261-06	0.0089758	0.00916912	0.0106788	0.0118902	0.0125983	0.0144361	0.0528346	0.0599416	0.0244901	0.0262791
1261-07	0.00836675	0.00828702	0.00980295	0.0104491	0.0103511	0.0125991	0.0465702	0.0480746	0.0228328	0.0216329
1261-08	0.00786581	0.00775946	0.00921761	0.00978239	0.00925322	0.0116421	0.0413422	0.0402964	0.020684	0.0186197
1261-09	0.00759642	0.00754092	0.00880803	0.00983239	0.0093084	0.0116082	0.0372173	0.035936	0.0175582	0.0164619
1261-10	0.0075598	0.00742173	0.00855023	0.0106637	0.00989941	0.0121814	0.0335077	0.0336339	0.0145234	0.0148141
1261-11	0.00747265	0.00736755	0.00831719	0.0114469	0.0105976	0.0126866	0.0305818	0.0329538	0.0129006	0.0138141
1261-12	0.0071444	0.00700116	0.00787405	0.0116345	0.0110716	0.0129246	0.0277394	0.0327358	0.011475	0.0130642
1262-01	0.00652246	0.00650476	0.007284	0.0111787	0.0108417	0.0126558	0.0248094	0.0320425	0.0102597	0.0122463
1262-02	0.00583286	0.00576762	0.00648874	0.00988998	0.00943133	0.0111952	0.0223883	0.0309581	0.0092849	0.0111734
1262-03	0.00515927	0.005046	0.00572306	0.0083644	0.00783893	0.00951491	0.0202539	0.0291222	0.0079963	0.00912927
1262-04	0.00463584	0.00444039	0.00516224	0.00701078	0.00648318	0.0081304	0.0184404	0.0266718	0.00681666	0.00762625
1262-05	0.00415667	0.00409939	0.00461593	0.00583143	0.00567068	0.00669699	0.0170102	0.0236451	0.00580258	0.00632488
1262-06	0.00384597	0.00379436	0.00411869	0.00500912	0.00476645	0.00537732	0.0158921	0.0201455	0.00499727	0.00529673
1262-07	0.00355805	0.00353272	0.00387393	0.00428836	0.00415207	0.00455683	0.0145166	0.0167313	0.00469663	0.00480278
1262-08	0.00337247	0.00337481	0.00368821	0.00393038	0.00376439	0.0041931	0.0132325	0.014231	0.00422337	0.004313
1262-09	0.00330715	0.003283	0.00355597	0.00389426	0.00375523	0.0041035	0.0122534	0.0133021	0.00350767	0.00369185
1262-10	0.00323072	0.00326517	0.00345305	0.00404546	0.00397692	0.00429539	0.0116584	0.0130274	0.00289424	0.00303049
1262-11	0.00319633	0.00320118	0.00337195	0.0042992	0.00432562	0.00451876	0.0109936	0.0130241	0.0023537	0.0023568
1262-12	0.00311501	0.0031236	0.0032997	0.00461627	0.00459853	0.00474585	0.0103965	0.0129533	0.00198371	0.00193071
1263-01	0.00299845	0.00296349	0.00310769	0.00477174	0.004614	0.00466552	0.00970074	0.0125452	0.00176798	0.00159168
1263-02	0.00273782	0.00273503	0.00287923	0.00446682	0.00440535	0.004283	0.00890046	0.0116514	0.00159223	0.00130272
1263-03	0.00247033	0.00256496	0.00268465	0.00388912	0.00400994	0.00388692	0.0083044	0.0110828	0.00161905	0.00129275
1263-04	0.00229853	0.00239881	0.00251633	0.00345419	0.00355703	0.00348281	0.00782876	0.0103681	0.00154547	0.00119918
1263-05	0.00211335	0.00220696	0.00235094	0.00293221	0.00306722	0.00306374	0.00767086	0.00990531	0.00141291	0.00137603
1263-06	0.0019959	0.0020646	0.00218057	0.0024517	0.00259796	0.00258173	0.00720607	0.00829377	0.00133657	0.00151942
1263-07	0.00192824	0.00198619	0.00209156	0.00214386	0.00226486	0.00228465	0.00665001	0.00676758	0.00123769	0.00129955
1263-08	0.0018961	0.00194492	0.00201107	0.00208123	0.00216457	0.00209343	0.00615473	0.00583227	0.00123925	0.0015963
1263-09	0.00191926	0.00190823	0.00196515	0.00213689	0.00216367	0.00205067	0.00589206	0.00557603	0.00117537	0.0014442
1263-10	0.00193404	0.00193965	0.00194463	0.00229364	0.00231663	0.00216216	0.00561098	0.00547585	0.000911891	0.000942204
1263-11	0.00195477	0.00196177	0.00194866	0.00251636	0.00252355	0.00236259	0.0054142	0.00570195	0.000782824	0.000641213
1263-12	0.00193782	0.00195008	0.00193475	0.00278843	0.00276271	0.00257244	0.00533833	0.00618595	0.000813076	0.0005653
1264-01	0.00189303	0.00193821	0.00187127	0.00290299	0.00293089	0.00262844	0.00512367	0.0062908	0.000942155	0.000624526
1264-02	0.00178849	0.00184484	0.00176551	0.00280577	0.00280074	0.00249759	0.00488034	0.00626802	0.000877616	0.000661225
1264-03	0.00170537	0.00174439	0.00167972	0.00259045	0.00253466	0.00232542	0.00479657	0.00642911	0.00114865	0.00120907
1264-04	0.00162617	0.00163628	0.00158978	0.00235021	0.00219915	0.00205614	0.0047613	0.00631684	0.0010303	0.00102524
1264-05	0.00152369	0.0015562	0.00152658	0.00199578	0.00189473	0.00181773	0.00490564	0.00655444	0.00098746	0.00115239
1264-06	0.00149386	0.00152339	0.00150644	0.00173533	0.00164874	0.00160857	0.00473149	0.00572518	0.000859149	0.00104856
1264-07	0.00149429	0.00149763	0.00149477	0.00156318	0.00146862	0.00146796	0.00449132	0.00504188	0.000985835	0.0011679
1264-08	0.00148586	0.00148801	0.00147207	0.00151163	0.00142362	0.00142219	0.00433687	0.00465576	0.00122119	0.0015734
1264-09	0.00148035	0.00147433	0.00146731	0.00154452	0.00144246	0.0014298	0.00415374	0.00447281	0.00103279	0.00126619
1264-10	0.00147828	0.0014728	0.00143277	0.00167345	0.0015711	0.00153098	0.004034	0.00444389	0.000812172	0.000861702
1264-11	0.00148828	0.00147197	0.00141908	0.00184033	0.00172035	0.00169089	0.00400948	0.00466904	0.000731068	0.000665487
1264-12	0.00152301	0.00148447	0.00142144	0.00203736	0.00190336	0.0018781	0.0039526	0.0049131	0.000729347	0.000508381
1265-01	0.00150138	0.00148558	0.00140803	0.00211377	0.00200892	0.00200617	0.00389657	0.0049924	0.000781462	0.000485153
1265-02	0.00142191	0.00143712	0.0013656	0.00199104	0.00191254	0.00198059	0.00384592	0.00507645	0.000895522	0.000736098
1265-03	0.00140335	0.00139877	0.00131832	0.00188847	0.00180218	0.00187151	0.00389646	0.00520707	0.00095195	0.00075034
1265-04	0.00139733	0.00132609	0.00127649	0.00179969	0.00157694	0.00171456	0.0039258	0.00517747	0.000920877	0.000767364
1265-05	0.00135442	0.0012463	0.00122835	0.00156812	0.00129911	0.00143635	0.00400259	0.00519823	0.000912108	0.000932291
1265-06	0.00132288	0.00123947	0.00122261	0.00131039	0.00115088	0.00123943	0.00388238	0.00463851	0.000949384	0.00134902
1265-07	0.00128696	0.00122917	0.00121091	0.00111447	0.00103744	0.00112868	0.00372262	0.0040588	0.000973089	0.0013684
1265-08	0.00128676	0.00123388	0.0011904	0.00109507	0.00101966	0.00105578	0.00354958	0.00368942	0.00111934	0.00144747
1265-09	0.00128682	0.0012261	0.00117489	0.00110931	0.00104739	0.00107935	0.00338564	0.00347973	0.00112838	0.00139784
1265-10	0.0013024	0.00123665	0.00117293	0.0012103	0.0011543	0.00115556	0.00327675	0.00346821	0.00086636	0.00109257
1265-11	0.00132598	0.00121952	0.00114689	0.00137393	0.00128063	0.00124168	0.00321119	0.00348555	0.000761274	0.000688579
1265-12	0.00132887	0.00121405	0.00114064	0.00153249	0.00139165	0.00134542	0.00319594	0.0036751	0.000654939	0.000442969
1266-01	0.00130405	0.00119943	0.00115038	0.0016494	0.00147269	0.00147949	0.0031612	0.00387417	0.000788297	0.0006204
1266-02	0.00128494	0.00117117	0.00113082	0.00163653	0.00151409	0.00144442	0.00312138	0.00410166	0.000899517	0.000648139
1266-03	0.00125183	0.00111285	0.00110901	0.00157495	0.00142753	0.00136818	0.00311363	0.00420468	0.00101972	0.000850584
1266-04	0.00122134	0.00108177	0.00106543	0.00147289	0.00133669	0.00125658	0.00315594	0.00431591	0.00102329	0.000973664
1266-05	0.00117841	0.00106353	0.0010292	0.0012677	0.0011836	0.00110386	0.00328798	0.00444602	0.00087258	0.000900929
1266-06	0.00117529	0.00106071	0.0010188	0.00113887	0.00107411	0.000999219	0.00337544	0.00426765	0.00100784	0.00144173
1266-07	0.00118696	0.00107062	0.00100877	0.00107178	0.00101221	0.000968864	0.00331207	0.0037692	0.00106251	0.00135328
1266-08	0.00121605	0.00108502	0.00100132	0.00102258	0.00100903	0.000961036	0.00316331	0.00336179	0.00112802	0.001355
1266-09	0.0012468	0.00105717	0.00101557	0.00107189	0.00101778	0.000996941	0.00303117	0.00316239	0.00107642	0.00141396
1266-10	0.00122386	0.00105506	0.00100727	0.0011648	0.00108991	0.00105527	0.00301753	0.00320695	0.00101393	0.0011864
1266-11	0.00124902	0.00105546	0.00100172	0.00130671	0.00120338	0.0011552	0.00308812	0.00344075	0.000768232	0.000602777
1266-12	0.0012701	0.00107495	0.00100221	0.00145917	0.00134382	0.00126684	0.00312284	0.00376283	0.000648286	0.000499654
1267-01	0.00127884	0.00111185	0.00101002	0.00153129	0.00150632	0.00136135	0.00311484	0.00394901	0.000788411	0.00058601
1267-02	0.00127256	0.00109054	0.00099962	0.00156516	0.0014878	0.00135112	0.00309692	0.00400769	0.000870205	0.000634534
1267-03	0.00126021	0.00104705	0.00101242	0.00151962	0.00138612	0.00129577	0.00315889	0.00407363	0.000938025	0.000729469
1267-04	0.001231	0.00101383	0.000964441	0.00142002	0.00127368	0.00112731	0.00336832	0.00435615	0.00102318	0.0011369
1267-05	0.00122223	0.00100831	0.000949717	0.00127964	0.00114332	0.0010063	0.00348024	0.00443928	0.000854966	0.000939519
1267-06	0.00124912	0.00102643	0.000961503	0.00115905	0.00103965	0.000897995	0.0034392	0.00396279	0.000935117	0.00119758
1267-07	0.00127248	0.00104696	0.000985983	0.00110414	0.000978724	0.000864015	0.00333363	0.00350437	0.00105093	0.00132775
1267-08	0.00126594	0.00107341	0.00099836	0.00107269	0.000970579	0.000898478	0.00322879	0.00326479	0.00120679	0.00134007
1267-09	0.00126125	0.00110751	0.00102808	0.00112534	0.00104403	0.0010037	0.0031238	0.00316939	0.00112729	0.00143769
1267-10	0.0012461	0.00111667	0.00104253	0.0012238	0.00115227	0.00112233	0.00310314	0.00315588	0.000898758	0.000883854
1267-11	0.00124286	0.00113976	0.00106156	0.00134289	0.00129567	0.00123384	0.00312473	0.00334396	0.000687676	0.000574371
1267-12	0.00123063	0.00114656	0.0010707	0.00145586	0.0014167	0.00131751	0.00310355	0.00356877	0.000738134	0.0005159
1268-01	0.00125198	0.00113439	0.00107978	0.00160836	0.00148491	0.0014014	0.00310632	0.00379032	0.000777533	0.00059225
1268-02	0.00123782	0.00113284	0.00108841	0.0015807	0.00149811	0.00141694	0.00306546	0.00388501	0.000898451	0.000623123
1268-03	0.00121432	0.0011258	0.00109505	0.00148599	0.00140374	0.0013979	0.00306571	0.00400941	0.00109563	0.000949973
1268-04	0.0012079	0.0011146	0.00108119	0.00136705	0.00128701	0.00128645	0.00316781	0.00427198	0.000926386	0.00090194
1268-05	0.00122178	0.00111576	0.00107684	0.00117807	0.00112088	0.00115505	0.00325023	0.00421771	0.000964481	0.00117203
1268-06	0.00127425	0.00116257	0.00110372	0.00104175	0.00104332	0.00102583	0.00326821	0.00393726	0.000962726	0.00130643
1268-07	0.00133107	0.00119691	0.00113033	0.00102162	0.000984572	0.000965662	0.00316368	0.00352498	0.00104554	0.00136789
1268-08	0.00134985	0.00119441	0.0011299	0.00102774	0.000942062	0.000927945	0.00306815	0.00327822	0.00116799	0.00136253
1268-09	0.00137317	0.0012068	0.00114227	0.00109032	0.000978607	0.000938214	0.00297634	0.00318561	0.0011516	0.00151402
1268-10	0.00138146	0.00123478	0.00118634	0.00120288	0.00107956	0.00110713	0.00296301	0.00317558	0.00085389	0.00103999
1268-11	0.00134315	0.00125249	0.0012414	0.00136079	0.00121663	0.00132479	0.00299473	0.00338546	0.000743599	0.000636708
1268-12	0.0013283	0.00126421	0.00126195	0.00153428	0.00140607	0.00148829	0.00304494	0.00378552	0.000681578	0.000498445
1269-01	0.0158427	0.0152014	0.0151329	0.00162209	0.00150816	0.00157313	0.0179429	0.00398311	0.0151288	0.000976768
1269-02	0.0559668	0.0572688	0.0623136	0.00177024	0.0016276	0.0016419	0.054812	0.00413591	0.0301142	0.00138128
1269-03	0.0742553	0.0779027	0.0851781	0.0022137	0.00183268	0.00218843	0.0709319	0.00427367	0.0341631	0.00168889
1269-04	0.0803268	0.0880313	0.087936	0.00257057	0.00199732	0.00271849	0.0782876	0.00453226	0.0341485	0.00152392
1269-05	0.083353	0.0943733	0.0891925	0.0027138	0.00195463	0.00313678	0.082385	0.00480519	0.0334205	0.00195039
1269-06	0.0843585	0.0976615	0.0902013	0.00273821	0.00193364	0.0036227	0.0837347	0.00465442	0.034178	0.0021563
1269-07	0.0835362	0.091473	0.0840337	0.0027505	0.00190154	0.00390347	0.0808821	0.00425396	0.0396691	0.00182774
1269-08	0.0815796	0.0818498	0.0730021	0.00264493	0.00186162	0.00400299	0.0743574	0.00400689	0.0403682	0.00192374
1269-09	0.0773991	0.0707216	0.0596614	0.00268904	0.00199671	0.0041035	0.0662667	0.00399773	0.0282966	0.00181437
1269-10	0.0706271	0.0579811	0.0472229	0.00295989	0.00248723	0.00441224	0.0571629	0.00436131	0.0207893	0.00133317
1269-11	0.0625853	0.0485984	0.0388729	0.00349008	0.00321386	0.00499782	0.0493419	0.0048563	0.0171098	0.00103341
1269-12	0.0565681	0.0422508	0.0333641	0.00405314	0.00413687	0.00584531	0.0435631	0.00602004	0.0146275	0.00108664
1270-01	0.0512051	0.0360894	0.0288946	0.00523532	0.00550643	0.00625885	0.0386072	0.007672	0.0121711	0.00119656
1270-02	0.0469363	0.0317712	0.0260221	0.00649437	0.0060636	0.0065434	0.0345528	0.0098237	0.0103246	0.00155442
1270-03	0.043639	0.0284081	0.0234131	0.0074186	0.00595202	0.00662105	0.0310779	0.0109951	0.00858829	0.00142701
1270-04	0.0411889	0.0260007	0.0217266	0.00746053	0.00552387	0.00643025	0.0280714	0.011887	0.00713041	0.00167039
1270-05	0.0389644	0.0235942	0.0203433	0.00742339	0.00543837	0.00603734	0.0258608	0.0123045	0.0058543	0.00168825
1270-06	0.0363606	0.0208642	0.0191553	0.00684962	0.0051769	0.0055571	0.0241001	0.0111501	0.00495564	0.00199674
1270-07	0.032358	0.01809	0.0165404	0.00611187	0.00448239	0.00471573	0.0218306	0.00947168	0.00460779	0.00185829
1270-08	0.0279738	0.0155975	0.0143553	0.00529293	0.00399155	0.00432055	0.019479	0.00814874	0.00393843	0.00200633
1270-09	0.0241068	0.0136316	0.0125268	0.0048702	0.0039213	0.00418036	0.0175023	0.00762102	0.0029047	0.00177405
1270-10	0.0219513	0.0120713	0.0113038	0.00493949	0.00410059	0.00437422	0.0156802	0.00761191	0.00210224	0.00136015
1270-11	0.0202894	0.0110718	0.0103384	0.00546977	0.00462219	0.00465685	0.0140402	0.00802634	0.00154028	0.000906832
1270-12	0.0181741	0.0100043	0.00965348	0.00613541	0.00509277	0.00529005	0.0129016	0.00876484	0.00128559	0.000727484
1271-01	0.0167691	0.00920641	0.00909602	0.00689333	0.00527646	0.0056492	0.0118644	0.00920833	0.00116296	0.000726967
1271-02	0.0154665	0.00839122	0.00846641	0.00693507	0.00506966	0.00587416	0.0109578	0.009531	0.0011679	0.000675153
1271-03	0.0145783	0.00775127	0.00776176	0.00681587	0.00485855	0.0052763	0.0103219	0.00990866	0.00111102	0.000701447
1271-04	0.0135033	0.00730317	0.00721293	0.00642058	0.0044259	0.00478781	0.00974579	0.00937084	0.00120391	0.000903633
1271-05	0.0125956	0.00691762	0.00669644	0.00589089	0.00412495	0.00434606	0.00953415	0.00892082	0.00106368	0.00109339
1271-06	0.0118892	0.00645489	0.00640427	0.00543099	0.00359245	0.00392355	0.00925346	0.00813579	0.00107662	0.00140626
1271-07	0.0108096	0.00600408	0.00610148	0.00475015	0.00321971	0.00348536	0.00881352	0.00716353	0.00131009	0.00170639
1271-08	0.00994325	0.00556	0.00573545	0.00458595	0.00299621	0.00334581	0.00824934	0.00646862	0.00129012	0.00164923
1271-09	0.00909854	0.00513904	0.00540426	0.00464054	0.00296921	0.00334671	0.00770628	0.0062263	0.00108106	0.00143294
1271-10	0.00856314	0.00485396	0.00510854	0.00517426	0.00318216	0.00356374	0.0072293	0.00613081	0.000853927	0.000865982
1271-11	0.00808489	0.00465169	0.00490396	0.00574701	0.00347369	0.00392115	0.00692629	0.00630447	0.000739141	0.00075608
1271-12	0.00769794	0.00441785	0.00474431	0.00627872	0.00372363	0.00432923	0.00662138	0.00654292	0.000779083	0.000690834
1272-01	0.00738466	0.00414324	0.00450121	0.006634	0.00388581	0.00465419	0.00619562	0.0065222	0.00077926	0.000580937
1272-02	0.00701543	0.00387233	0.00416991	0.00659401	0.00385053	0.00437445	0.00586691	0.00661157	0.000803906	0.000583515
1272-03	0.00657239	0.00365778	0.00387365	0.00606819	0.00352444	0.00386387	0.00566114	0.00661028	0.000926489	0.000782633
1272-04	0.00616576	0.00351672	0.00371151	0.00541974	0.00324202	0.00348934	0.00548935	0.0063909	0.000909949	0.000872244
1272-05	0.00585008	0.00336647	0.00352557	0.00487957	0.0028201	0.00297516	0.00539192	0.0060687	0.000860417	0.0010318
1272-06	0.00541264	0.00329004	0.00341491	0.00405354	0.00239712	0.00256673	0.00530576	0.00570497	0.000872535	0.00113439
1272-07	0.00496942	0.00313743	0.00334352	0.00336374	0.002057	0.00236518	0.00500816	0.00497637	0.00104252	0.00122469
1272-08	0.00462015	0.00302894	0.00318402	0.00314921	0.00192892	0.00226876	0.00475064	0.00441888	0.00113923	0.00133352
1272-09	0.00439959	0.00292579	0.00306593	0.00314506	0.00195857	0.00225143	0.00447325	0.00427828	0.00107142	0.0011933
1272-10	0.00424673	0.00287866	0.00303529	0.00340188	0.00218222	0.00255371	0.0043164	0.00437235	0.00091667	0.000874074
1272-11	0.00410596	0.00285836	0.002986	0.00378814	0.00257309	0.00292369	0.00418043	0.00452043	0.000708496	0.00059956
1272-12	0.00398735	0.00284505	0.00296912	0.0041746	0.0030052	0.0033063	0.00408147	0.0048408	0.000701832	0.00055056
1273-01	0.00388904	0.00272135	0.00291667	0.00433369	0.00307969	0.00357616	0.00402603	0.00515477	0.000787596	0.00060112
1273-02	0.00364001	0.00257756	0.00281243	0.0041624	0.00296985	0.00344644	0.00392743	0.00523274	0.000872391	0.000784129
1273-03	0.0033982	0.00240792	0.00270763	0.00379607	0.00270237	0.00326324	0.00384381	0.00535685	0.000991058	0.000841724
1273-04	0.00325722	0.00234422	0.00255614	0.00351798	0.00250749	0.00284962	0.00384788	0.00549349	0.000904491	0.000852009
1273-05	0.00309118	0.00226247	0.00247825	0.0030849	0.00217089	0.00250694	0.00395892	0.00566741	0.000939129	0.0009553
1273-06	0.00296816	0.00222712	0.00242357	0.00265604	0.00188626	0.00219269	0.00397587	0.00522566	0.000994284	0.00136307
1273-07	0.00290368	0.0021904	0.00235414	0.00236355	0.0017577	0.00194324	0.00375013	0.00450199	0.00105884	0.00127037
1273-08	0.00277719	0.00212642	0.00230864	0.00225631	0.00169141	0.00185695	0.00352572	0.00391893	0.00128568	0.00197976
1273-09	0.00276386	0.00211929	0.0022859	0.00227433	0.0017623	0.00188166	0.00341745	0.00366523	0.00109846	0.00154195
1273-10	0.00276392	0.00211342	0.00223639	0.00243765	0.00193015	0.00201944	0.00334706	0.00370225	0.000767913	0.000726899
1273-11	0.00270048	0.00210798	0.00217992	0.00265495	0.00221046	0.00225239	0.00334759	0.00384643	0.000682658	0.000617094
1273-12	0.00263363	0.00206586	0.00211406	0.00293067	0.00245283	0.00250705	0.00339676	0.00415228	0.000757713	0.000576565
1274-01	0.0025297	0.00204442	0.00203133	0.00304104	0.00260478	0.00260722	0.00336598	0.00437126	0.000829213	0.000606431
1274-02	0.00240204	0.00195327	0.00190402	0.0030338	0.00251689	0.002471	0.00335942	0.00442583	0.000837973	0.000599891
1274-03	0.00222865	0.00185577	0.00180993	0.00272788	0.00235289	0.00227561	0.00335489	0.00448945	0.00116911	0.00111151
1274-04	0.00214713	0.00177227	0.00175886	0.00248786	0.00209269	0.00208144	0.00342207	0.0044943	0.00108987	0.00106157
1274-05	0.00210649	0.00171004	0.00168769	0.00222733	0.00180569	0.00177486	0.00350615	0.00446726	0.00106151	0.0012228
1274-06	0.00207279	0.00168971	0.00165488	0.0018992	0.00157485	0.00152238	0.00363427	0.0046137	0.000808401	0.00103671
1274-07	0.00199575	0.00166515	0.00164273	0.0016774	0.00140242	0.00138774	0.00343532	0.00384629	0.000984224	0.00109124
1274-08	0.00193123	0.00165262	0.00161826	0.00159606	0.00133343	0.001313	0.00327126	0.00335854	0.00116232	0.00157032
1274-09	0.00191121	0.00163104	0.00157834	0.00163679	0.00132838	0.00129489	0.00318314	0.00332962	0.00111746	0.00129538
1274-10	0.00187381	0.00162999	0.0015618	0.00175553	0.00143837	0.00141301	0.00310447	0.00331924	0.000810448	0.000902334
1274-11	0.0018654	0.00159874	0.00151616	0.00200545	0.00157126	0.00156004	0.0030993	0.00347663	0.00080535	0.000695234
1274-12	0.00184464	0.00156073	0.00152539	0.00222785	0.00172326	0.00175266	0.00313001	0.00367776	0.000739853	0.000579397
1275-01	0.00177651	0.00156155	0.00147171	0.00231884	0.00186574	0.0018565	0.00313084	0.0038794	0.000754106	0.000491809
1275-02	0.00169002	0.00147478	0.00138494	0.00226559	0.00177804	0.00174834	0.00316227	0.0041831	0.000852739	0.000622775
1275-03	0.00159796	0.00141346	0.00130302	0.00207659	0.00164965	0.00160841	0.00314792	0.00415851	0.000904933	0.000695179
1275-04	0.00151091	0.00138067	0.00126002	0.00183545	0.00150387	0.00148748	0.00322257	0.00433412	0.00100756	0.000970614
1275-05	0.00144035	0.00133703	0.00120281	0.00157742	0.00132042	0.00131249	0.00322361	0.00403882	0.000924333	0.00104799
1275-06	0.00137877	0.00130794	0.00115912	0.00131401	0.00114688	0.00110913	0.00325106	0.00379743	0.000916143	0.0012535
1275-07	0.00132989	0.00130216	0.00114905	0.0011434	0.00106613	0.00102995	0.00315952	0.00347533	0.00102295	0.00116558
1275-08	0.00127697	0.00128043	0.00110424	0.00104329	0.00103641	0.000994852	0.00305071	0.00325665	0.0011282	0.00138226
1275-09	0.00125656	0.00126995	0.00109501	0.00105847	0.00111735	0.00100135	0.00296095	0.00321556	0.00103849	0.00130582
1275-10	0.00123635	0.00124737	0.00107825	0.00115455	0.00120099	0.00107859	0.0029146	0.00317786	0.000855037	0.000873395
1275-11	0.00121867	0.00123382	0.00107944	0.00128034	0.0013159	0.0011835	0.00293639	0.00337059	0.000701946	0.000569625
1275-12	0.00122564	0.00123766	0.0010856	0.00140552	0.00143243	0.00129487	0.00294936	0.00361299	0.000781395	0.000579949
1276-01	0.00122612	0.00118886	0.00106098	0.00151861	0.00151751	0.00135062	0.002974	0.00393587	0.0500637	0.00678491
1276-02	0.00116896	0.00108564	0.00101957	0.0014104	0.00141976	0.00134526	0.00297802	0.00427215	0.103542	0.0371048
1276-03	0.00113592	0.00105554	0.000989688	0.00140745	0.00136439	0.0012742	0.00296344	0.00437182	0.128394	0.0902973
1276-04	0.0236498	0.0242947	0.0264052	0.00330685	0.00506312	0.0119526	0.0164073	0.00865084	0.137724	0.119715
1276-05	0.1509	0.161388	0.174255	0.0403905	0.0648512	0.116052	0.107484	0.0564985	0.14055	0.126371
1276-06	0.245357	0.248104	0.266427	0.0802489	0.135139	0.196941	0.188959	0.101298	0.140538	0.12375
1276-07	0.279317	0.274183	0.293307	0.0989401	0.151743	0.216681	0.230452	0.114968	0.138358	0.116417
1276-08	0.283887	0.281212	0.292273	0.103044	0.172963	0.221113	0.250785	0.117811	0.135185	0.110385
1276-09	0.278492	0.274441	0.285316	0.116096	0.181252	0.232575	0.259317	0.120203	0.131635	0.110645
1276-10	0.274457	0.264862	0.273065	0.141264	0.204315	0.252574	0.261589	0.126385	0.127934	0.116766
1276-11	0.267153	0.254476	0.260713	0.170885	0.220947	0.267372	0.259406	0.148836	0.124966	0.128026
1276-12	0.254405	0.234218	0.246879	0.202221	0.220171	0.276255	0.255669	0.179555	0.122581	0.139282
1277-01	0.241657	0.215904	0.223793	0.211355	0.22561	0.258227	0.249143	0.215953	0.120572	0.147517
1277-02	0.218962	0.188358	0.197509	0.18887	0.195768	0.229555	0.240294	0.238699	0.117919	0.150593
1277-03	0.196979	0.166018	0.173097	0.161643	0.169656	0.184536	0.231899	0.251956	0.113869	0.14464
1277-04	0.178612	0.146135	0.151715	0.140404	0.142473	0.147003	0.225301	0.249094	0.108142	0.134236
1277-05	0.160951	0.130716	0.134849	0.123841	0.120691	0.120665	0.219374	0.235	0.10353	0.124907
1277-06	0.142036	0.114262	0.119873	0.101847	0.0995928	0.0971425	0.212572	0.21404	0.0992144	0.111283
1277-07	0.124909	0.100557	0.104443	0.0873304	0.0843685	0.0782059	0.204196	0.192314	0.10033	0.0988059
1277-08	0.110099	0.0899174	0.0897396	0.0773276	0.0740407	0.0665782	0.194559	0.176528	0.0966046	0.0880396
1277-09	0.0970558	0.0813812	0.078326	0.0723806	0.0694736	0.0596144	0.186706	0.172992	0.0853321	0.082248
1277-10	0.0867382	0.073709	0.0687351	0.0722937	0.068378	0.0573227	0.178758	0.177838	0.0731502	0.0792674
1277-11	0.0769641	0.067355	0.0613412	0.0716422	0.069829	0.0577652	0.171717	0.188395	0.0670896	0.0780352
1277-12	0.0667066	0.0602022	0.0547788	0.0679209	0.06818	0.0558746	0.163289	0.200816	0.0619497	0.0765836
1278-01	0.0573617	0.0524754	0.04932	0.0595729	0.0616301	0.0525404	0.152308	0.20411	0.0563086	0.0714784
1278-02	0.0494559	0.0455468	0.0437859	0.0499803	0.0518831	0.0469422	0.140847	0.198267	0.0501251	0.0640133
1278-03	0.0430743	0.0409629	0.0392176	0.0409521	0.0438033	0.0404797	0.129275	0.184471	0.0442253	0.0559017
1278-04	0.0379006	0.0373645	0.0360635	0.0338792	0.0366844	0.034651	0.11963	0.170785	0.0383664	0.0462606
1278-05	0.0335218	0.0347742	0.0334565	0.0283673	0.031339	0.0306363	0.111265	0.151605	0.0334511	0.0378208
1278-06	0.0297466	0.0320664	0.0311468	0.0230377	0.0266122	0.0267101	0.103823	0.130095	0.0304759	0.0323079
1278-07	0.026599	0.0297401	0.0281643	0.01986	0.0226823	0.0224746	0.0953185	0.110137	0.0282166	0.0267614
1278-08	0.0238481	0.0271853	0.025579	0.0176159	0.0204629	0.0196719	0.0879807	0.0961785	0.0264974	0.0226933
1278-09	0.0216743	0.0250685	0.0238263	0.0168044	0.019985	0.0189665	0.0819917	0.0900689	0.0224419	0.0205593
1278-10	0.0198867	0.0232974	0.0223938	0.0169492	0.0207632	0.0190845	0.0763041	0.0874707	0.018898	0.0191626
1278-11	0.0183737	0.0220771	0.0207974	0.0175567	0.0218719	0.0193991	0.0708107	0.0851064	0.0167761	0.0175215
1278-12	0.0170545	0.0209301	0.0194401	0.0182764	0.0228461	0.0200488	0.0649483	0.0820316	0.0149437	0.0163269
1279-01	0.0155541	0.0193602	0.0180658	0.0180225	0.0228436	0.0203458	0.0581172	0.0765633	0.0134199	0.0151644
1279-02	0.0140843	0.017772	0.0164793	0.0165307	0.0219766	0.0184449	0.0520485	0.0693138	0.011834	0.0135094
1279-03	0.0127432	0.0160983	0.0150001	0.0148882	0.0196603	0.0163098	0.0461985	0.061158	0.0102648	0.0115645
1279-04	0.0116166	0.0148652	0.0137152	0.0129243	0.0172488	0.0139266	0.0411378	0.0527915	0.00897847	0.00966242
1279-05	0.0106595	0.0138916	0.01256	0.010766	0.0152728	0.0121907	0.0369595	0.0446332	0.00786425	0.00832032
1279-06	0.010111	0.0129025	0.0115888	0.0095666	0.0130109	0.0103264	0.0331746	0.0359486	0.00689542	0.00708548
1279-07	0.00955587	0.0118232	0.0106744	0.00855366	0.0111552	0.00874693	0.0294732	0.0280441	0.00646514	0.00593585
1279-08	0.00899421	0.0112173	0.00995661	0.00796047	0.0104373	0.00815953	0.0264338	0.0237785	0.00590395	0.00504408
1279-09	0.00847075	0.0106023	0.00940005	0.00802953	0.0101342	0.0081118	0.0239861	0.0216063	0.00492622	0.00444814
1279-10	0.00794284	0.00993356	0.00894612	0.00851795	0.0100255	0.00825207	0.0220176	0.0207798	0.00388545	0.00348501
1279-11	0.00757398	0.00941325	0.00869438	0.00907984	0.010587	0.00887609	0.0200151	0.0205002	0.00333303	0.00298657
1279-12	0.0071881	0.00886303	0.00828659	0.00932198	0.0109289	0.00934876	0.0183178	0.0208399	0.00285612	0.00264396
1280-01	0.00666313	0.00812424	0.00775993	0.00907872	0.0109698	0.00925402	0.0166377	0.0209023	0.00240235	0.00216231
1280-02	0.00591774	0.00732453	0.0071094	0.008285	0.00991721	0.0085111	0.0151606	0.0205561	0.00216466	0.00202764
1280-03	0.00515077	0.0066615	0.00655678	0.00681057	0.00858523	0.00771632	0.0137293	0.019116	0.00208425	0.00188527
1280-04	0.004632	0.00612047	0.00606838	0.00570502	0.00728345	0.00678289	0.0126274	0.0177995	0.00176471	0.00168391
1280-05	0.00409983	0.00549963	0.0056578	0.00459613	0.0059616	0.00587109	0.0117006	0.0158284	0.00153444	0.00153924
1280-06	0.00360089	0.00510737	0.00529782	0.00365073	0.00516911	0.00509162	0.0109445	0.0134782	0.00141191	0.00167916
1280-07	0.00330477	0.0046741	0.00494647	0.00320155	0.00447136	0.00438974	0.0101765	0.0115725	0.00150334	0.00165779
1280-08	0.00301717	0.00429449	0.00470091	0.00294154	0.00396003	0.00407555	0.00940461	0.0100085	0.00140509	0.00156685
1280-09	0.00285702	0.00395817	0.00445571	0.00291908	0.00374517	0.00411501	0.00879838	0.00932663	0.0013885	0.0016386
1280-10	0.00277144	0.00371614	0.00425604	0.00305132	0.00378486	0.0043877	0.00833148	0.00915655	0.000996227	0.000985203
1280-11	0.00268494	0.00350106	0.00407791	0.00319707	0.00387759	0.00466355	0.00794002	0.00917927	0.000877076	0.000666314
1280-12	0.00255832	0.00324641	0.00391159	0.00336553	0.00386573	0.00510096	0.00757341	0.00926001	0.000822681	0.000652633
1281-01	0.00241512	0.00294121	0.00366387	0.00336994	0.00373578	0.00506366	0.00723068	0.00948309	0.000847892	0.000643577
1281-02	0.00221291	0.00256852	0.00338803	0.0030564	0.00331348	0.0046429	0.00679014	0.00918963	0.000877403	0.000637865
1281-03	0.00204515	0.00231534	0.00312619	0.00277253	0.00289927	0.00414978	0.00638576	0.00863254	0.000999227	0.000750591
1281-04	0.00187907	0.00212893	0.0028741	0.00241463	0.00249979	0.00357608	0.00609797	0.00823517	0.00103897	0.00100869
1281-05	0.0017487	0.00193326	0.00261688	0.00206838	0.00208282	0.00299372	0.00596927	0.0077353	0.000974404	0.00118105
1281-06	0.00166759	0.00173359	0.00239224	0.00179509	0.00169187	0.00246602	0.00581731	0.00701531	0.00100332	0.00123591
1281-07	0.00160232	0.00158211	0.00219564	0.00158813	0.00141413	0.0020855	0.00528587	0.00557106	0.00101911	0.00123198
1281-08	0.00153175	0.00147729	0.0020316	0.00147838	0.00130747	0.00187129	0.00499602	0.00493391	0.00114702	0.00134306
1281-09	0.00150462	0.00139821	0.00190176	0.00145492	0.00129355	0.00182286	0.00472824	0.00462769	0.00110178	0.00143891
1281-10	0.00146754	0.00130827	0.00179168	0.00150058	0.0013681	0.00189134	0.00456577	0.00460647	0.000792131	0.000829258
1281-11	0.00143596	0.00124343	0.00167801	0.0015925	0.00146645	0.00194701	0.00449239	0.00481151	0.00073473	0.00066054
1281-12	0.0014087	0.00120423	0.00155337	0.00171373	0.00158426	0.00198692	0.00440615	0.00508415	0.00079267	0.000634155
1282-01	0.00136684	0.00114523	0.00142494	0.00179908	0.00165572	0.00188826	0.00435044	0.00550677	0.00074542	0.000488704
1282-02	0.00129072	0.00106893	0.00128189	0.00173284	0.0015643	0.00166312	0.0041411	0.00534401	0.000811715	0.000525093
1282-03	0.00121197	0.00100332	0.00113804	0.00156536	0.00143134	0.00140532	0.00405951	0.00532448	0.00103439	0.000804834
1282-04	0.00117877	0.000944953	0.00103925	0.0014464	0.00128202	0.00121716	0.0041399	0.00558743	0.0010644	0.000844208
1282-05	0.00112611	0.000888028	0.000949226	0.00124241	0.0010844	0.00101579	0.00416373	0.00538995	0.00104643	0.00122578
1282-06	0.00109657	0.000821548	0.000900208	0.0010572	0.000878597	0.000861331	0.00421028	0.00517233	0.00100758	0.00133755
1282-07	0.00108945	0.000786816	0.00085219	0.000966225	0.000777767	0.000775156	0.00407081	0.0046894	0.00110886	0.00150287
1282-08	0.00106369	0.000770663	0.000792901	0.000913313	0.000758205	0.000713173	0.00384338	0.00405365	0.00127863	0.00148829
1282-09	0.00104297	0.000767921	0.000766641	0.000943535	0.000790726	0.000697369	0.0036399	0.00380073	0.00107614	0.00130837
1282-10	0.00104606	0.000760589	0.000763815	0.00105337	0.000855708	0.000763629	0.00356113	0.00378519	0.000850092	0.0010045
1282-11	0.00104293	0.00075752	0.000760039	0.00116747	0.000922242	0.000847929	0.00350049	0.00388607	0.000789401	0.000737902
1282-12	0.00104114	0.000761824	0.000761107	0.00130169	0.000999615	0.000939642	0.0034671	0.00404007	0.000792307	0.000524927
1283-01	0.00104869	0.000761534	0.000751749	0.00141746	0.00102726	0.000989834	0.00339879	0.00400769	0.000874977	0.000527316
1283-02	0.0009973	0.000751225	0.000729303	0.001343	0.00101902	0.000975538	0.00336288	0.00413	0.000924835	0.000618533
1283-03	0.000959616	0.000734587	0.000712616	0.00121565	0.000968934	0.00092759	0.00339867	0.00428411	0.0010864	0.000780337
1283-04	0.00092976	0.000705166	0.000720752	0.00108612	0.000863875	0.000931333	0.00357412	0.00469083	0.00110201	0.00107144
1283-05	0.000916118	0.000686486	0.000717341	0.000956153	0.000741602	0.000846745	0.00356255	0.00445881	0.000985035	0.00107631
1283-06	0.000923456	0.000699911	0.000727103	0.000819368	0.000641018	0.000757355	0.00354668	0.0040757	0.00107544	0.00155519
1283-07	0.000935188	0.0007326	0.000738583	0.000774326	0.000639871	0.000724638	0.00343792	0.00362919	0.000912623	0.00108097
1283-08	0.000948722	0.000733255	0.000724914	0.00074853	0.000635871	0.000672661	0.00330623	0.00325265	0.00109189	0.00140559
1283-09	0.00096167	0.000744696	0.000728343	0.000787845	0.00067895	0.0006686	0.00321951	0.00318706	0.00107626	0.00130686
1283-10	0.000966006	0.000736667	0.000723643	0.000881679	0.00074173	0.000717202	0.00312224	0.00313687	0.000960064	0.00110025
1283-11	0.000973363	0.000727552	0.000746078	0.000999089	0.000808675	0.000840952	0.00313773	0.00328755	0.000809513	0.000720998
1283-12	0.000984584	0.000705891	0.000754091	0.00112237	0.000889887	0.000916108	0.00316268	0.00358253	0.000832713	0.000683821
1284-01	0.00100036	0.000709732	0.00077889	0.00124593	0.000970311	0.00102308	0.0031729	0.00382151	0.000800999	0.000513996
1284-02	0.000975147	0.000742853	0.000799041	0.0012123	0.000995945	0.00105754	0.00316386	0.00412586	0.000811681	0.000627431
1284-03	0.000955197	0.00079718		0.00117367	0.00106065		0.00311656	0.00422027	0.000905677	0.00066188
1284-04	0.000941857	0.000811392	0.000799916	0.00112198	0.00107623	0.0010249	0.00325791	0.00446972	0.00104509	0.000951174
1284-05	0.000914762	0.000771277	0.000810681	0.000963003	0.000904731	0.000923326	0.00340897	0.00460551	0.000966177	0.00102236
1284-06	0.000933836	0.00077338	0.000858914	0.000865843	0.000823612	0.000839036	0.00354096	0.00460487	0.000946082	0.00122418
1284-07	0.000937298	0.000747421	0.00087771	0.000801378	0.000752298	0.000796892	0.00332992	0.00381737	0.00106025	0.00117393
1284-08	0.000941968	0.000740398	0.000894618	0.000785807	0.000733389	0.000766995	0.00314856	0.00335214	0.00113158	0.00120795
1284-09	0.000941109	0.000752944	0.000914178	0.000799228	0.000753136	0.000796666	0.00303706	0.00319232	0.000968171	0.00115727
1284-10	0.00095113	0.000761499	0.000959185	0.000873209	0.000821206	0.00089732	0.00301727	0.00319215	0.000800149	0.000760138
1284-11	0.000947166	0.000786726	0.000969843	0.00100441	0.00091766	0.00102772	0.00306549	0.00340705	0.000700648	0.000517942
1284-12	0.00095007	0.00082632	0.000962885	0.00115076	0.00105206	0.00116149	0.003078	0.00367725	0.00070261	0.000451039
1285-01	0.000967455	0.000866718	0.000968885	0.00130052	0.00119226	0.00129825	0.00306218	0.0038591	0.00077553	0.000574063
1285-02	0.000970798	0.000871136	0.000963873	0.0013322	0.00122361	0.00132935	0.00305484	0.00403851	0.000953771	0.000814937
1285-03	0.000979903	0.00086781	0.000941757	0.00129681	0.00119261	0.00130611	0.00315731	0.00420797	0.000955308	0.000786729
1285-04	0.00097806	0.000865852	0.000920871	0.00119191	0.00113864	0.00122648	0.00329185	0.0043874	0.00100772	0.00101042
1285-05	0.000956653	0.000841526	0.000937542	0.00102012	0.00100709	0.00112844	0.00332535	0.0043584	0.000995737	0.00105446
1285-06	0.000989673	0.000867342	0.000980347	0.000906633	0.000931245	0.00102299	0.00337502	0.00412302	0.000965803	0.00127278
1285-07	0.00101499	0.000889879	0.00104334	0.000846873	0.000877324	0.00101079	0.00325767	0.00368129	0.00108932	0.00146598
1285-08	0.00102263	0.000900019	0.00107802	0.000826876	0.000834964	0.00103511	0.00311754	0.00330101	0.00116716	0.00145599
1285-09	0.00106122	0.000936899	0.00106823	0.00091908	0.000866287	0.00105703	0.0030637	0.00325276	0.000982403	0.00123704
1285-10	0.00110769	0.000945635	0.00105329	0.0011286	0.000963624	0.00109407	0.00297987	0.00318921	0.000859512	0.000767384
1285-11	0.00110978	0.000963224	0.00103365	0.00126361	0.00112458	0.00117856	0.00299319	0.00327945	0.000797965	0.000738128
1285-12	0.00114475	0.000984315	0.00103104	0.00141963	0.00124546	0.00128682	0.00303813	0.00351289	0.000703543	0.00047138
1286-01	0.0318574	0.0406057	0.0402444	0.0163109	0.0211936	0.012267	0.0312865	0.00987025	0.0623601	0.0117325
1286-02	0.207635	0.226258	0.235115	0.166508	0.190753	0.119599	0.153056	0.0697174	0.133184	0.0602479
1286-03	0.326003	0.322723	0.348884	0.367655	0.32869	0.230261	0.244758	0.16968	0.166315	0.125883
1286-04	0.379901	0.347807	0.372189	0.476634	0.374002	0.304394	0.290035	0.251489	0.180862	0.163371
1286-05	0.384225	0.329664	0.356596	0.487433	0.359218	0.295768	0.30572	0.279581	0.186179	0.182507
1286-06	0.365684	0.314572	0.335739	0.47766	0.350181	0.281574	0.307884	0.264556	0.18589	0.178403
1286-07	0.331924	0.292496	0.322698	0.416551	0.329853	0.269248	0.301475	0.235525	0.1833	0.167608
1286-08	0.305075	0.270114	0.304801	0.375622	0.302189	0.252159	0.293954	0.216141	0.179004	0.156856
1286-09	0.281424	0.250259	0.28293	0.352212	0.293029	0.241064	0.286936	0.213797	0.173589	0.155115
1286-10	0.246328	0.224672	0.260343	0.313943	0.267936	0.24562	0.28101	0.227455	0.168283	0.164071
1286-11	0.205436	0.205522	0.242321	0.263872	0.27252	0.258855	0.276999	0.253825	0.164199	0.178473
1286-12	0.170684	0.183735	0.22232	0.219516	0.262887	0.274565	0.271982	0.283527	0.161546	0.194571
1287-01	0.139995	0.152625	0.198425	0.178659	0.225918	0.25549	0.266001	0.312653	0.157286	0.204205
1287-02	0.115291	0.122671	0.172249	0.14557	0.178475	0.221269	0.256747	0.319978	0.153454	0.208104
1287-03	0.0948816	0.0990815	0.147532	0.116108	0.138236	0.176595	0.247202	0.317456	0.147002	0.199789
1287-04	0.0809793	0.0823712	0.128961	0.090847	0.108407	0.14232	0.237819	0.30443	0.138957	0.184843
1287-05	0.0711288	0.0699887	0.112739	0.0735957	0.0836774	0.116146	0.228798	0.285411	0.131946	0.169297
1287-06	0.0634573	0.0605108	0.0982215	0.0599968	0.0682601	0.0928529	0.22096	0.258613	0.126287	0.150281
1287-07	0.0569201	0.0528208	0.0847543	0.0490706	0.0561659	0.075914	0.209081	0.224977	0.127544	0.131195
1287-08	0.0518567	0.0469707	0.0725375	0.0424647	0.0473799	0.0643701	0.194303	0.200608	0.121978	0.115633
1287-09	0.0475338	0.0433385	0.063206	0.0392254	0.0436751	0.058741	0.180488	0.188619	0.105275	0.107033
1287-10	0.0440959	0.0408137	0.0561314	0.0385307	0.0443024	0.057244	0.168415	0.18504	0.0902774	0.102563
1287-11	0.0410236	0.0387007	0.0498307	0.0387952	0.0457615	0.0567402	0.157333	0.185777	0.0824141	0.101258
1287-12	0.0379679	0.0361977	0.0443558	0.0392819	0.0474822	0.0547929	0.145904	0.184103	0.0766172	0.100928
1288-01	0.0349575	0.0332408	0.0388045	0.039198	0.0467702	0.0513921	0.134207	0.176929	0.0704911	0.0975995
1288-02	0.0317442	0.03071	0.0341259	0.0360035	0.0430504	0.0446497	0.121536	0.16477	0.0629296	0.0859693
1288-03	0.028923	0.0280968	0.0300298	0.0318954	0.0383564	0.0377025	0.107894	0.146345	0.0545985	0.0736133
1288-04	0.0270012	0.0258058	0.0273083	0.0291993	0.0335234	0.0330984	0.0967747	0.130451	0.047462	0.0619265
1288-05	0.0249117	0.0237654	0.0253124	0.0258466	0.0282777	0.0299027	0.0877242	0.110142	0.0411081	0.0505843
1288-06	0.0232506	0.0220136	0.0234858	0.0226361	0.0237875	0.0267542	0.079033	0.0894327	0.0371466	0.0412512
1288-07	0.0215026	0.0201103	0.0212965	0.0198881	0.0200759	0.0231657	0.0699659	0.0695088	0.0351534	0.0349304
1288-08	0.0196617	0.0188254	0.0196422	0.0180132	0.0182891	0.0204904	0.0620189	0.0567423	0.0323701	0.0299319
1288-09	0.0185962	0.0179877	0.0183485	0.0172006	0.0181157	0.019372	0.056238	0.0515165	0.0274221	0.0264794
1288-10	0.0174029	0.0172279	0.0173251	0.0172075	0.0184695	0.0192985	0.0513058	0.0495409	0.0227653	0.0244804
1288-11	0.016396	0.0166425	0.0161897	0.0179523	0.0194246	0.019166	0.0466272	0.0489979	0.0202847	0.023314
1288-12	0.0157429	0.0160545	0.0149508	0.0190291	0.0207217	0.0187994	0.0421574	0.0482328	0.0186209	0.022639
1289-01	0.0145586	0.0148333	0.0136207	0.0184051	0.0201906	0.0178815	0.0374752	0.0469175	0.0167412	0.0212076
1289-02	0.0132642	0.0135044	0.0122905	0.0167292	0.018653	0.0163022	0.0335919	0.044737	0.0147767	0.0179841
1289-03	0.0119446	0.0121285	0.0106535	0.0144318	0.0159712	0.0130638	0.0302439	0.0416939	0.0126722	0.0150873
1289-04	0.010837	0.0110553	0.00973007	0.0120101	0.0137481	0.0112277	0.0273191	0.0379169	0.0107805	0.0123884
1289-05	0.00986082	0.0100232	0.00892017	0.00993226	0.0115077	0.00967466	0.0251328	0.0332109	0.00921866	0.00996064
1289-06	0.00923398	0.00928469	0.00813722	0.00848097	0.00976079	0.00816421	0.0233334	0.0282413	0.008079	0.00826616
1289-07	0.00872663	0.00852844	0.00757771	0.00746507	0.00828448	0.00723093	0.0212911	0.0234686	0.00727859	0.00701206
1289-08	0.00810959	0.00784045	0.00714927	0.00679828	0.00750175	0.006714	0.0196311	0.0206028	0.00662336	0.00597362
1289-09	0.00761771	0.00750151	0.00659445	0.00653564	0.00756864	0.00638498	0.0183143	0.0193197	0.00550466	0.00523064
1289-10	0.00736549	0.00736808	0.00622394	0.00689055	0.00807998	0.00646733	0.0170689	0.0188671	0.00456049	0.00437993
1289-11	0.00717791	0.00704549	0.00596128	0.00752754	0.00841397	0.00665331	0.0160746	0.0190153	0.00383202	0.00372743
1289-12	0.00665827	0.00674581	0.00585668	0.00789994	0.00874333	0.00705535	0.0150108	0.0193011	0.00325715	0.00309582
1290-01	0.00608443	0.00636329	0.00551555	0.00808767	0.0085716	0.00696057	0.0136685	0.0181771	0.00288817	0.002606
1290-02	0.00549231	0.00585862	0.0050859	0.00733825	0.00799276	0.00659793	0.0124599	0.0169188	0.00266054	0.00228344
1290-03	0.00498071	0.00529486	0.00462758	0.00632657	0.00691015	0.005781	0.0112934	0.0153241	0.0024291	0.00221746
1290-04	0.00460951	0.00488516	0.004307	0.00537629	0.00593832	0.00509824	0.0105567	0.0139851	0.00221637	0.00195909
1290-05	0.0042497	0.00454119	0.00405701	0.004492	0.00504925	0.00441136	0.0100541	0.012775	0.00182225	0.00170206
1290-06	0.00399028	0.00421232	0.00379918	0.00377947	0.00425381	0.00375324	0.00928478	0.0104324	0.00166299	0.00186599
1290-07	0.00376694	0.00391533	0.00363195	0.00322607	0.00364825	0.00331988	0.00865051	0.00883912	0.0016525	0.00182792
1290-08	0.00354191	0.00373538	0.00346269	0.00298892	0.00341202	0.00311057	0.00801891	0.00764212	0.00172105	0.00197801
1290-09	0.00342594	0.00352689	0.00336202	0.0030291	0.00330624	0.00310726	0.00756873	0.00718042	0.00144602	0.00169343
1290-10	0.00327508	0.00336824	0.00332261	0.00315259	0.00346451	0.00332789	0.00710093	0.00700852	0.0011342	0.00108024
1290-11	0.00315683	0.0032533	0.00328446	0.00332283	0.00366473	0.00366353	0.00676243	0.00714693	0.000945587	0.000820234
1290-12	0.00301751	0.00313422	0.00320589	0.00348181	0.00382269	0.00393313	0.00648654	0.00747099	0.000821337	0.000578076
1291-01	0.00277188	0.00293257	0.0030355	0.00342846	0.00386894	0.00396562	0.00609204	0.00752235	0.000976496	0.000716694
1291-02	0.00245045	0.00269405	0.00279174	0.00295451	0.00359205	0.00378585	0.00576219	0.0074088	0.000913199	0.000663623
1291-03	0.00223151	0.002442	0.00256478	0.00259058	0.00316408	0.00328839	0.00551645	0.0072784	0.00104109	0.000899328
1291-04	0.00208827	0.00223869	0.00239046	0.002264	0.00277437	0.00286249	0.00541282	0.007159	0.0011241	0.000935618
1291-05	0.00194542	0.00206346	0.002238	0.00193662	0.00229612	0.00247629	0.00546671	0.00724306	0.0010982	0.00123263
1291-06	0.00186923	0.00195512	0.00210989	0.00171645	0.00191812	0.00204667	0.00522384	0.0062857	0.000983029	0.00129069
1291-07	0.00179962	0.00187458	0.00199746	0.00155641	0.00169322	0.00179631	0.00495065	0.00555112	0.00107697	0.00126502
1291-08	0.00169908	0.00181579	0.00192636	0.00142066	0.00158784	0.00168481	0.00468188	0.00501879	0.00120849	0.00141679
1291-09	0.00162891	0.00177925	0.00188536	0.001433	0.00160326	0.00170458	0.00447214	0.00477114	0.00102337	0.00128211
1291-10	0.00158027	0.00176377	0.00181625	0.0015223	0.00168721	0.00177366	0.00429402	0.00475053	0.000765242	0.000709363
1291-11	0.00154484	0.00173406	0.00175317	0.00166176	0.00182856	0.00193333	0.00420201	0.00488272	0.000888003	0.000896984
1291-12	0.00151129	0.00171735	0.00168224	0.00179887	0.00201946	0.0020982	0.00414844	0.00512742	0.000711697	0.000600353
1292-01	0.00147835	0.00167504	0.00162321	0.0018918	0.00208619	0.00218109	0.00407931	0.00536279	0.000815177	0.00058395
1292-02	0.00136735	0.0015555	0.00150754	0.00181175	0.00198004	0.00201565	0.00401164	0.00552077	0.000853392	0.000649495
1292-03	0.00126239	0.00144747	0.00138977	0.00163885	0.00182762	0.00177338	0.00395948	0.00558818	0.000980448	0.000835546
1292-04	0.00120074	0.00135445	0.00131973	0.00146064	0.00158097	0.00158772	0.00396965	0.00554682	0.000834951	0.000835784
1292-05	0.00116661	0.00129658	0.00124238	0.00130841	0.00136381	0.00138759	0.00402788	0.00536675	0.000897831	0.00112024
1292-06	0.00111872	0.00128119	0.00116009	0.0010823	0.00117432	0.0011935	0.0040423	0.00503381	0.000871199	0.00111451
1292-07	0.00111032	0.00129105	0.00108141	0.0010028	0.00108865	0.00104649	0.00383766	0.00425702	0.00101064	0.00124029
1292-08	0.00109704	0.00128447	0.000994211	0.000991469	0.0010688	0.000960124	0.00364439	0.00372221	0.00112508	0.0013046
1292-09	0.00108228	0.00127999	0.000947018	0.0010207	0.00109183	0.00094549	0.0034695	0.00340945	0.00102681	0.00126928
1292-10	0.00106978	0.00126464	0.000936106	0.00106789	0.00118982	0.000996962	0.00341781	0.00345176	0.000843209	0.000915855
1292-11	0.00106613	0.00126679	0.000912196	0.0011699	0.00135029	0.00107207	0.00340166	0.00354572	0.0007434	0.000658564
1292-12	0.0010691	0.00125655	0.000919471	0.00129749	0.0015156	0.00121022	0.00340797	0.00381312	0.000757286	0.00056563
1293-01	0.00107662	0.0012564	0.000909941	0.00138356	0.00164363	0.00127694	0.00343755	0.00409984	0.000787224	0.000605485
1293-02	0.00106317	0.00120349	0.000866792	0.00136701	0.00156676	0.00119633	0.00337016	0.0041882	0.000952603	0.000809601
1293-03	0.0010271	0.00118342	0.000817766	0.00132181	0.00148167	0.00108099	0.00338997	0.00439548	0.00114574	0.000979701
1293-04	0.000985062	0.00116307	0.000782637	0.00120529	0.0013379	0.00102053	0.00338854	0.00436666	0.00122198	0.00126784
1293-05	0.000958199	0.0011149	0.000766185	0.00104798	0.00116802	0.000934955	0.00375536	0.00515866	0.00107639	0.00126117
1293-06	0.00094511	0.00108233	0.000781181	0.000921778	0.000981452	0.000865251	0.0035955	0.00427692	0.00101795	0.00140365
1293-07	0.000963937	0.00106788	0.00079887	0.000885877	0.000872918	0.000826191	0.003444	0.00372418	0.00108053	0.00129955
1293-08	0.000947314	0.00104984	0.000793177	0.000837063	0.000826484	0.000813572	0.00337399	0.00349897	0.00118413	0.00165533
1293-09	0.000941913	0.00104136	0.000788734	0.000845951	0.000836492	0.000819152	0.00324894	0.00334166	0.00103109	0.0013688
1293-10	0.000936425	0.0010512	0.000810208	0.000951979	0.000934048	0.000909188	0.00322113	0.00335016	0.00082361	0.000881751
1293-11	0.00094581	0.001057	0.000848013	0.00107741	0.00106488	0.00102905	0.00329841	0.00365555	0.000730003	0.000589081
1293-12	0.000945344	0.00105506	0.000883493	0.00118005	0.00118997	0.00117087	0.00331856	0.00406938	0.000640992	0.000378631
1294-01	0.000950856	0.00108423	0.000899372	0.0012398	0.0013486	0.00128293	0.00333047	0.00430584	0.000686552	0.000532957
1294-02	0.000951181	0.00103901	0.000869413	0.00119876	0.00127611	0.00124588	0.00331821	0.00442468	0.000824282	0.000546463
1294-03	0.000970104	0.0010226	0.000874495	0.00116477	0.0012642	0.00125211	0.00332608	0.00458795	0.000909273	0.000740138
1294-04	0.000983434	0.000988639	0.000871187	0.00112902	0.00116631	0.00115269	0.00346768	0.00486051	0.0010026	0.00104493
1294-05	0.000966774	0.000960443	0.000867854	0.000976591	0.00101944	0.00101508	0.0035423	0.00472049	0.000964936	0.00111564
1294-06	0.000986267	0.000949718	0.000884171	0.000873188	0.000921076	0.000906822	0.00355081	0.00441137	0.00101003	0.00127704
1294-07	0.00101146	0.000940948	0.000927756	0.000829777	0.000851562	0.000904151	0.00333433	0.00374103	0.00102108	0.00126209
1294-08	0.00101714	0.000922045	0.000965845	0.000819836	0.000831047	0.000931979	0.00326407	0.00359379	0.00127851	0.0015638
1294-09	0.00102544	0.000929961	0.000981886	0.000861355	0.000830177	0.00098937	0.00314782	0.00342573	0.00105541	0.00132174
1294-10	0.00104779	0.000933202	0.000990646	0.000945811	0.000906678	0.00107027	0.00311286	0.00346277	0.000820728	0.000896111
1294-11	0.00107998	0.000941953	0.000995846	0.00107898	0.00102389	0.00113716	0.00306685	0.00351074	0.000734672	0.000544486
1294-12	0.00108508	0.000955723	0.00101496	0.00121427	0.00117586	0.00123106	0.00309947	0.00370963	0.000696005	0.000469794
1295-01	0.00106793	0.000952454	0.00104332	0.00134702	0.00126574	0.00130243	0.00312036	0.00400465	0.000789045	0.000557564
1295-02	0.00104641	0.000946903	0.00104319	0.00135389	0.00127283	0.00132519	0.00306495	0.00405521	0.000844044	0.000694169
1295-03	0.00101921	0.000934913	0.000989711	0.00131542	0.00120956	0.00117109	0.00312873	0.00435753	0.00087602	0.00071087
1295-04	0.00100312	0.000949934	0.000965676	0.0012407	0.00114563	0.00105662	0.0032074	0.00440165	0.000903315	0.000866966
1295-05	0.00100065	0.000962068	0.000957535	0.00110636	0.0010451	0.000933357	0.00327249	0.00433023	0.000969516	0.00109442
1295-06	0.00101827	0.000993556	0.000997391	0.00100553	0.000963712	0.000875212	0.00320743	0.00382988	0.000896501	0.00107591
1295-07	0.00103277	0.00102884	0.00106958	0.000950689	0.000946869	0.00088364	0.0031078	0.00341691	0.00104529	0.00109882
1295-08	0.00104265	0.00105533	0.00110037	0.000944292	0.000975025	0.000908207	0.0030027	0.00310626	0.0012013	0.00160847
1295-09	0.00106143	0.00109294	0.00111106	0.000968374	0.00106393	0.000927788	0.002921	0.00305779	0.00117652	0.00159568
1295-10	0.00109634	0.0011116	0.00113147	0.00111603	0.00117177	0.00104057	0.00291961	0.00309248	0.000907001	0.000921256
1295-11	0.00110772	0.00113221	0.00114768	0.00128475	0.00129301	0.0011787	0.00295057	0.00317853	0.000827211	0.000803011
1295-12	0.00111627	0.00117217	0.00115894	0.00140167	0.001435	0.00134063	0.00299399	0.00348372	0.000759631	0.000526229
1296-01	0.00110932	0.00120622	0.00115944	0.00147621	0.0015264	0.00146949	0.00301883	0.00376848	0.000768097	0.000524292
1296-02	0.00107417	0.00120448	0.00115866	0.00142221	0.00160084	0.00150218	0.0029785	0.00387082	0.000910067	0.000650297
1296-03	0.00106895	0.00116773	0.00113696	0.00139185	0.00152854	0.00147038	0.00301122	0.0041436	0.000859975	0.000701569
1296-04	0.00107789	0.00116491	0.00111553	0.00133152	0.00143754	0.0013592	0.00310719	0.0042962	0.0010391	0.000965525
1296-05	0.00108551	0.00115251	0.00106638	0.00120812	0.00125589	0.00117473	0.0031701	0.00423561	0.00088373	0.000987374
1296-06	0.00114991	0.00116916	0.00104969	0.00115402	0.00112785	0.00101144	0.00326555	0.00413397	0.00100507	0.00139738
1296-07	0.00119373	0.00118453	0.00107884	0.00111601	0.00104762	0.000963557	0.00315099	0.00362434	0.00109668	0.00133402
1296-08	0.00121499	0.00119913	0.00109622	0.00114393	0.00103428	0.000951888	0.00302194	0.00327521	0.00115913	0.00139218
1296-09	0.00124459	0.00121814	0.00112913	0.00121219	0.0010322	0.000984407	0.00292882	0.0031399	0.00111055	0.00137032
1296-10	0.00127055	0.0012279	0.00116	0.00130807	0.00110069	0.00111083	0.00291858	0.00315558	0.000837807	0.000890739
1296-11	0.00127199	0.00126861	0.00118304	0.00142672	0.00125036	0.00125459	0.00291248	0.00321371	0.00076793	0.000564898
1296-12	0.00127904	0.00129977	0.00120021	0.00157574	0.00144311	0.00137705	0.00291814	0.00348166	0.000710459	0.000496541
1297-01	0.00127952	0.00131661	0.00125169	0.00167335	0.00160255	0.00155374	0.00299938	0.00392701	0.000853406	0.000618234
1297-02	0.00123982	0.00129664	0.00128277	0.00164315	0.00161914	0.00166012	0.00293735	0.00388808	0.000898473	0.000712636
1297-03	0.0011892	0.00130383	0.00126839	0.00153537	0.00161824	0.00164395	0.00296882	0.00399345	0.0010386	0.00084439
1297-04	0.00116183	0.00127193	0.00125815	0.00141141	0.00151206	0.00156441	0.00310672	0.0042811	0.00106315	0.00102695
1297-05	0.00115721	0.00125518	0.00126807	0.00122716	0.00135555	0.00143427	0.00322866	0.00437133	0.000993	0.00109669
1297-06	0.00119008	0.00127015	0.00129755	0.00107608	0.00123194	0.00130267	0.00318673	0.00392624	0.000931631	0.00126062
1297-07	0.00123906	0.00126537	0.00131432	0.000999457	0.00112939	0.00125503	0.00313088	0.00350663	0.00110074	0.00138335
1297-08	0.00126314	0.00126973	0.00129356	0.000990542	0.00110493	0.00119343	0.00300203	0.00322663	0.00110335	0.00131971
1297-09	0.00131224	0.001284	0.00129817	0.00105865	0.0011479	0.00119017	0.00291516	0.00311595	0.000994227	0.00115461
1297-10	0.00137179	0.00127028	0.00128372	0.00121802	0.00126656	0.00128099	0.00282701	0.00304774	0.000870589	0.00095059
1297-11	0.00141233	0.00126287	0.0012687	0.00144525	0.00140362	0.00139911	0.00284327	0.00321023	0.000748489	0.000638231
1297-12	0.00144109	0.00127162	0.00125217	0.00165423	0.00158712	0.00152836	0.0028669	0.00336775	0.000661326	0.000483214
1298-01	0.00144033	0.00123797	0.001264	0.00174011	0.00168223	0.00165908	0.00293733	0.00368149	0.000767987	0.000538512
1298-02	0.00143734	0.00123015	0.00127636	0.00181872	0.00174397	0.00168904	0.00292795	0.00381739	0.000911716	0.000606283
1298-03	0.00142753	0.00119378	0.00127653	0.00177492	0.00168331	0.00164621	0.00290361	0.00382362	0.00101479	0.000739337
1298-04	0.00139296	0.00114453	0.00126752	0.00162108	0.00159251	0.00150413	0.00300603	0.00413989	0.00101171	0.00103702
1298-05	0.00135332	0.0011096	0.00125989	0.00142197	0.00139439	0.00133273	0.00318099	0.00454547	0.000941059	0.00114838
1298-06	0.00135173	0.00112452	0.00129074	0.00123826	0.00121048	0.00115608	0.00312919	0.00402547	0.000928418	0.00126663
1298-07	0.00133186	0.00114027	0.00131696	0.0011115	0.00106796	0.00104404	0.00291453	0.00331381	0.00105043	0.00129232
1298-08	0.00134726	0.00114133	0.00133769	0.00111133	0.000986997	0.00101567	0.00276561	0.00292063	0.00125044	0.00160807
1298-09	0.00133992	0.00117693	0.00137043	0.00113626	0.00102326	0.0010828	0.00270036	0.00286306	0.00112293	0.0013676
1298-10	0.00134145	0.00118965	0.00141303	0.00123073	0.00116313	0.00128172	0.0026914	0.00292575	0.00082458	0.000862386
1298-11	0.00138026	0.00122607	0.0014345	0.00145916	0.00136169	0.00152406	0.00276315	0.00317779	0.000880228	0.000883342
1298-12	0.00140966	0.0012603	0.00144753	0.00166876	0.00156207	0.00174534	0.0028629	0.00357581	0.000746372	0.000556563
1299-01	0.00141457	0.00129599	0.00145608	0.00183001	0.00177787	0.00190671	0.00290787	0.00378849	0.000793546	0.000475527
1299-02	0.00141495	0.00126901	0.00144565	0.00186964	0.00176549	0.0018727	0.00287981	0.00394663	0.00084437	0.000570226
1299-03	0.00138266	0.00126082	0.00139269	0.0018158	0.00174717	0.00168762	0.00289722	0.00411283	0.000960659	0.000624659
1299-04	0.00132564	0.00121707	0.00136242	0.00165193	0.00156054	0.00156664	0.002941	0.00408963	0.00103104	0.000943539
1299-05	0.00132096	0.00117982	0.00136325	0.0015191	0.00137123	0.00145393	0.00309661	0.00419366	0.000931333	0.00110746
1299-06	0.00132918	0.00117159	0.00137663	0.00135214	0.00118236	0.0013251	0.00316355	0.00390579	0.001013	0.00135964
1299-07	0.0013354	0.00119231	0.00139088	0.00124618	0.00109384	0.00125772	0.00307157	0.00338839	0.00105755	0.00141672
1299-08	0.00134171	0.00123861	0.00138217	0.00118615	0.00108137	0.00121102	0.00296694	0.0031575	0.00116917	0.00151209
1299-09	0.00135161	0.001306	0.00138775	0.00122951	0.00113421	0.00120958	0.00289512	0.00303907	0.00103734	0.00130796
1299-10	0.0013653	0.0013545	0.00138426	0.00135877	0.0012683	0.00130232	0.00284593	0.00301902	0.000886764	0.00076222
1299-11	0.00137932	0.00135664	0.00140293	0.00153632	0.00142484	0.0014757	0.00288698	0.0031278	0.000740554	0.000653849
1299-12	0.00138806	0.0013591	0.00141825	0.00170331	0.00158918	0.00169505	0.00290593	0.00336521	0.000722474	0.000626551
1300-01	0.00139486	0.00136	0.00141041	0.00184345	0.00171642	0.00181829	0.00291587	0.00365238	0.000820417	0.000432764
1300-02	0.00139718	0.00134867	0.00136694	0.00193761	0.00170936	0.00179658	0.00290948	0.00370853	0.000831426	0.000593113
1300-03	0.00137148	0.00133544	0.00129358	0.00191352	0.00169211	0.00167502	0.00291996	0.00379188	0.000996076	0.000806411
1300-04	0.00135346	0.00131431	0.0012381	0.00181632	0.00160998	0.00152947	0.00304298	0.00399645	0.000942139	0.000804695
1300-05	0.00132939	0.00128313	0.00120918	0.00167493	0.00143387	0.00135934	0.00316367	0.00405463	0.000918196	0.000936053
1300-06	0.00131126	0.00129657	0.00120569	0.0015067	0.00127238	0.00119794	0.00320767	0.00386532	0.00104105	0.0012424
1300-07	0.00132943	0.00129479	0.0012168	0.0013982	0.00117374	0.00111006	0.00311529	0.00341675	0.00109994	0.00158817
1300-08	0.00132538	0.00127166	0.00124124	0.00136233	0.00112211	0.00109026	0.00301722	0.00321544	0.00122268	0.00147347
1300-09	0.00131597	0.00127335	0.00127937	0.00137535	0.00115061	0.00114002	0.00289499	0.0030416	0.00113674	0.00139042
1300-10	0.00134188	0.00126589	0.00131308	0.00143056	0.0012567	0.0012691	0.00289756	0.00310641	0.000826525	0.000904213
1300-11	0.00135774	0.00128634	0.00134175	0.00152076	0.00140322	0.0014205	0.00294724	0.0032206	0.000773857	0.000709817
1300-12	0.00142176	0.00130317	0.00136326	0.00175122	0.00157376	0.00158459	0.00295904	0.0034902	0.000682755	0.000447401
1301-01	0.00146184	0.00134123	0.00134322	0.00194178	0.0017528	0.00165615	0.00296064	0.00376583	0.000764803	0.000502939
1301-02	0.00146884	0.00129706	0.00133711	0.00199999	0.00172398	0.00173201	0.00298037	0.003946	0.000766207	0.000538435
1301-03	0.00145255	0.00122875	0.00129507	0.00195437	0.00157551	0.00166854	0.00298799	0.00406314	0.000880522	0.000800347
1301-04	0.00145817	0.00119717	0.00124373	0.00185629	0.00148099	0.00151769	0.003051	0.00419087	0.000959224	0.000901147
1301-05	0.00143204	0.00116282	0.00124367	0.0016971	0.0012964	0.00139372	0.00312131	0.00424032	0.000979907	0.00116509
1301-06	0.00140256	0.00116476	0.00127096	0.0014785	0.00115935	0.00123993	0.00314164	0.0040664	0.000882926	0.00108779
1301-07	0.00139886	0.00119529	0.00130386	0.00134652	0.00110551	0.00116728	0.00306071	0.0036763	0.0010084	0.00133234
1301-08	0.00141527	0.00117842	0.00131542	0.0013163	0.00106235	0.0011203	0.0029693	0.00327144	0.00124228	0.00143225
1301-09	0.00141618	0.00117111	0.00136548	0.00137048	0.00106226	0.00112457	0.00283897	0.00310381	0.00105483	0.00127899
1301-10	0.00144413	0.00118614	0.00139457	0.00148658	0.00117398	0.00122743	0.00280882	0.00310228	0.000898979	0.00111524
1301-11	0.00147647	0.00120798	0.00142253	0.001677	0.00133095	0.00140585	0.00281282	0.00323074	0.000753951	0.000602611
1301-12	0.00150916	0.00124794	0.00144883	0.00189414	0.00150169	0.00161061	0.00285882	0.0034776	0.000731854	0.000565256
1302-01	0.00152101	0.00126999	0.00140438	0.00204076	0.0016275	0.00171968	0.0028782	0.00364323	0.000780452	0.000686973
1302-02	0.00148059	0.00126842	0.0013802	0.00200773	0.00168598	0.00172719	0.00287536	0.0037901	0.000784107	0.000639169
1302-03	0.00144244	0.00126057	0.0013749	0.00191757	0.0016597	0.00169283	0.00285646	0.00392558	0.000862044	0.000729111
1302-04	0.00138743	0.00127189	0.00137987	0.00172414	0.00161577	0.00161476	0.00290816	0.00409859	0.00104086	0.00104602
1302-05	0.00136273	0.00124008	0.00135881	0.00152512	0.00140327	0.00140849	0.00298106	0.00414681	0.000942146	0.000977869
1302-06	0.00138085	0.00126553	0.00137103	0.00137226	0.00127347	0.00125805	0.00301683	0.00393301	0.000932146	0.00132539
1302-07	0.00138978	0.00128425	0.00139175	0.00127103	0.00119603	0.00119055	0.00292981	0.00341075	0.00109033	0.00138249
1302-08	0.00137532	0.00129122	0.00139776	0.00119659	0.00113255	0.00122067	0.00279117	0.00307765	0.00116571	0.00143186
1302-09	0.00135841	0.00132949	0.00141575	0.00119048	0.00113186	0.00130864	0.0027553	0.0030226	0.00101378	0.00134209
1302-10	0.00138095	0.00136548	0.00142106	0.00134795	0.00125235	0.00141978	0.00274082	0.00304991	0.000870728	0.000875428
1302-11	0.00140459	0.00141541	0.00144901	0.00155054	0.00144491	0.00158138	0.00276527	0.0031978	0.000736999	0.000644168
1302-12	0.0014312	0.00143409	0.00145645	0.00177212	0.00165509	0.00173	0.00283043	0.00354023	0.000764959	0.000514922
1303-01	0.0014279	0.00143938	0.00145129	0.00186333	0.00178397	0.00186582	0.00291225	0.00398882	0.000845402	0.000545242
1303-02	0.00140728	0.00141454	0.00143187	0.00182205	0.00177411	0.00191852	0.00289138	0.00409321	0.000863423	0.000592781
1303-03	0.00141206	0.00139926	0.00137972	0.00180314	0.00172156	0.00178582	0.00291459	0.0040928	0.000846274	0.000822784
1303-04	0.00140926	0.00138193	0.00132906	0.00175703	0.00160109	0.0016728	0.00303419	0.00426682	0.000922812	0.000878701
1303-05	0.00138378	0.00136262	0.0012912	0.00157951	0.00145434	0.00149691	0.00316286	0.00438196	0.000981313	0.00113096
1303-06	0.00139072	0.00136213	0.00131988	0.00137651	0.00128066	0.0013624	0.00314622	0.00394526	0.000936741	0.00122277
1303-07	0.00140421	0.00136789	0.0013462	0.00128115	0.00122382	0.00127982	0.00304898	0.00352097	0.00103852	0.00126149
1303-08	0.00137564	0.00137555	0.00135897	0.00121406	0.00121912	0.00126074	0.00292169	0.00318363	0.00112503	0.00136243
1303-09	0.0013577	0.00139591	0.00136266	0.00124585	0.00125748	0.00128867	0.00281839	0.00303916	0.00106643	0.00130412
1303-10	0.00136467	0.00140265	0.00136427	0.00136137	0.0013464	0.00140148	0.00281224	0.00304822	0.000944921	0.00105973
1303-11	0.00136733	0.00142948	0.0013902	0.00148093	0.0015293	0.00151046	0.00283611	0.00318649	0.00071389	0.000689234
1303-12	0.00139676	0.00147475	0.00141534	0.00164807	0.00176645	0.00165279	0.0028926	0.00347364	0.000890362	0.000688977
1304-01	0.00142151	0.00147914	0.00142159	0.00175976	0.00190139	0.001785	0.00286837	0.00355142	0.0007708	0.00053461
1304-02	0.00144822	0.00143157	0.00141016	0.00178031	0.00184081	0.00180583	0.00285438	0.00365715	0.000882153	0.000723209
1304-03	0.00147552	0.00138707	0.00134234	0.00173281	0.00175606	0.00171265	0.00288845	0.00379744	0.000943287	0.000759592
1304-04	0.00145414	0.00133642	0.00129309	0.00157025	0.00163974	0.00160996	0.00298017	0.00385348	0.00105349	0.000934187
1304-05	0.0014136	0.00125966	0.00127729	0.0013668	0.00141148	0.00140954	0.00316221	0.00411397	0.00102739	0.00106333
1304-06	0.00140253	0.00123953	0.00129008	0.00118726	0.00122756	0.00119351	0.00330004	0.00419868	0.00100197	0.00132497
1304-07	0.00139954	0.00124525	0.0013151	0.00109037	0.00112721	0.00110032	0.00317588	0.00365312	0.00114813	0.00136943
1304-08	0.00139637	0.00125769	0.00133133	0.00105358	0.00110845	0.00106024	0.00297704	0.00316619	0.00112967	0.00122448
1304-09	0.00139105	0.00129501	0.00138494	0.00107711	0.00116084	0.00116431	0.0028463	0.00294174	0.00102414	0.00113472
1304-10	0.0013892	0.0013233	0.00144107	0.00116258	0.00128095	0.00135408	0.00279045	0.00285207	0.00086065	0.000932601
1304-11	0.00138592	0.00136866	0.00147922	0.00128969	0.00148415	0.00154547	0.00279023	0.00299628	0.000657824	0.000479979
1304-12	0.00141664	0.00139163	0.00152541	0.00147604	0.00164627	0.00173679	0.00289108	0.00336401	0.00070372	0.000516325
1305-01	0.00142038	0.00138817	0.00154275	0.00159628	0.00172471	0.00189171	0.00289898	0.00360992	0.000768795	0.000529908
1305-02	0.00138382	0.00137764	0.00149347	0.00162885	0.00174047	0.00183093	0.00285289	0.00372761	0.000957888	0.000749889
1305-03	0.00134938	0.00134332	0.00141738	0.00160496	0.00166467	0.00167282	0.00292738	0.00407453	0.000999891	0.000814564
1305-04	0.0013185	0.00130895	0.00139493	0.00152551	0.00156287	0.00155253	0.00302612	0.00423213	0.000963983	0.000847815
1305-05	0.00129927	0.00126491	0.00136642	0.00134147	0.00137526	0.00134044	0.00312079	0.00427195	0.000900919	0.00102559
1305-06	0.00133133	0.00126244	0.00138367	0.00123051	0.00123365	0.00117522	0.00314403	0.00395565	0.000909045	0.001242
1305-07	0.00134148	0.00129859	0.00138986	0.00113257	0.00118514	0.00112048	0.00306724	0.00352205	0.00120387	0.00158834
1305-08	0.00131442	0.0013381	0.00139105	0.00108561	0.00122715	0.00112225	0.00294431	0.00326171	0.00123692	0.00142196
1305-09	0.00132544	0.00133614	0.00139981	0.00115228	0.0012742	0.00118995	0.00284406	0.00311117	0.00116505	0.00154758
1305-10	0.0013508	0.001354	0.00145505	0.00126423	0.00136404	0.00133576	0.00280057	0.00304956	0.000813672	0.000822863
1305-11	0.00137421	0.0013439	0.00149422	0.00142579	0.00150419	0.00151581	0.00287495	0.00332277	0.000812031	0.000657133
1305-12	0.00138348	0.00137747	0.00152036	0.00158189	0.00168311	0.0017439	0.00295646	0.00371372	0.000766058	0.000535699
1306-01	0.0013697	0.00141555	0.00150688	0.00171481	0.00185445	0.00187509	0.00292286	0.0037254	0.00433928	0.00103478
1306-02	0.00135797	0.00140296	0.00146289	0.00175858	0.00184505	0.00185923	0.00294001	0.00380306	0.00680373	0.00107512
1306-03	0.00134952	0.00140823	0.00143185	0.00171159	0.0018008	0.00180649	0.00292935	0.00373316	0.00651043	0.00108743
1306-04	0.00133084	0.00138684	0.00142125	0.001612	0.00168577	0.00170923	0.00307082	0.00396258	0.00595585	0.00114888
1306-05	0.00132574	0.00136477	0.00140725	0.0014616	0.00148306	0.00155481	0.0032393	0.00409125	0.00544912	0.00145078
1306-06	0.00135862	0.00138433	0.00142446	0.00132059	0.00128525	0.00141765	0.00320272	0.00359308	0.00483587	0.00149185
1306-07	0.00138621	0.00138136	0.0014328	0.00125248	0.001128	0.00131083	0.00311048	0.00321035	0.00501255	0.00162099
1306-08	0.00141511	0.00139201	0.0014402	0.00125735	0.00107917	0.00128057	0.00302208	0.00303976	0.00479037	0.00151898
1306-09	0.00140291	0.00141416	0.00144906	0.00127849	0.00115291	0.00130916	0.00287608	0.00282709	0.00341737	0.00151974
1306-10	0.00549974	0.0048617	0.00517027	0.00135373	0.00128012	0.00143382	0.00642868	0.00286267	0.00254549	0.00122548
1306-11	0.0140364	0.0132427	0.0128279	0.00152382	0.00143288	0.0016054	0.0147653	0.00299006	0.00187794	0.000806503
1306-12	0.0156769	0.0154905	0.0152607	0.00176399	0.00167958	0.00183625	0.0190662	0.00328752	0.00145031	0.000645291
1307-01	0.0168969	0.0165758	0.015939	0.00193945	0.00195927	0.00205622	0.0206528	0.00366666	0.00123172	0.000432829
1307-02	0.0176873	0.0169948	0.0172002	0.00195531	0.0021075	0.00220567	0.0214066	0.00421275	0.00127496	0.000701293
1307-03	0.0185755	0.0171244	0.0186907	0.00185355	0.00215733	0.00232764	0.0217748	0.00487191	0.00122467	0.000813238
1307-04	0.0202453	0.0176491	0.0191057	0.00181207	0.0021707	0.00230939	0.0218494	0.00533137	0.00110591	0.000777034
1307-05	0.0205718	0.0183649	0.0187784	0.0017415	0.0020628	0.00219668	0.0220078	0.00568401	0.00106822	0.000921042
1307-06	0.0206944	0.0176791	0.0175325	0.00161661	0.00191168	0.0020083	0.0218756	0.00567388	0.000985412	0.001264
1307-07	0.0194355	0.0157481	0.0177644	0.0015373	0.00178871	0.00175287	0.0205211	0.00510395	0.00108792	0.00120384
1307-08	0.0176422	0.013221	0.016606	0.00149539	0.00169126	0.00163605	0.0189488	0.00467222	0.00113254	0.00123577
1307-09	0.0155341	0.0110134	0.0149471	0.0015072	0.00165866	0.00163231	0.0171941	0.00454303	0.00111488	0.00128039
1307-10	0.0135475	0.00951839	0.0133425	0.00159186	0.00180977	0.00179154	0.0151004	0.00460657	0.000985681	0.000899811
1307-11	0.0119216	0.00845188	0.0123971	0.00182112	0.00206735	0.00224977	0.0134395	0.00501898	0.000715959	0.000526326
1307-12	0.0110887	0.00788697	0.0112743	0.00216892	0.00235542	0.00270596	0.012141	0.00578958	0.000719972	0.000558828
1308-01	0.0104931	0.00711596	0.0102765	0.00242752	0.00265793	0.00314914	0.0111378	0.00683294	0.000825909	0.000603529
1308-02	0.00979036	0.00644795	0.0094248	0.00266842	0.00271256	0.00333485	0.0101708	0.00749984	0.000857365	0.000675341
1308-03	0.0092536	0.00595403	0.00891128	0.00273786	0.00260457	0.00333498	0.00940294	0.00765671	0.000947859	0.000665139
1308-04	0.00874298	0.00564448	0.00848106	0.00268989	0.00250074	0.00319909	0.00891215	0.00783056	0.00108582	0.000990165
1308-05	0.00821393	0.00530661	0.00798626	0.00252014	0.00229071	0.00294975	0.00858545	0.00765312	0.00101589	0.00113448
1308-06	0.00779269	0.00506943	0.00756076	0.00231065	0.00211543	0.00260687	0.00822805	0.00675248	0.00101651	0.00120027
1308-07	0.00707055	0.00470638	0.00701478	0.00207054	0.00188982	0.00241698	0.0077701	0.00587529	0.00105224	0.00116936
1308-08	0.00638329	0.00429956	0.0063498	0.00191693	0.0017491	0.0023435	0.00725107	0.0052849	0.00119375	0.00144604
1308-09	0.00571579	0.00386249	0.00581967	0.00189385	0.00165317	0.00244656	0.0067653	0.00496684	0.00106465	0.00123823
1308-10	0.0051939	0.00361086	0.00542868	0.00194092	0.00178952	0.00275536	0.00633752	0.00489257	0.000791128	0.000724236
1308-11	0.0047708	0.00340985	0.00496486	0.00222344	0.00210579	0.00302566	0.00612297	0.00516135	0.000801649	0.00086419
1308-12	0.0044473	0.00320517	0.0047325	0.00252171	0.00226595	0.00335793	0.00592783	0.00552385	0.000758755	0.000630134
1309-01	0.00420119	0.00299894	0.00443196	0.00265388	0.00243359	0.00359944	0.00573232	0.00583177	0.000803961	0.000547891
1309-02	0.00394619	0.00284061	0.00411234	0.00256238	0.00243906	0.00350867	0.0055183	0.00588487	0.000749124	0.000513685
1309-03	0.00381454	0.00273438	0.00389323	0.00256864	0.00233203	0.00331677	0.00538206	0.00587364	0.000937458	0.000683211
1309-04	0.00375005	0.00265669	0.0037081	0.0025005	0.0021857	0.00301699	0.00530474	0.00576176	0.00104935	0.000991758
1309-05	0.00369278	0.00254781	0.00360751	0.00228274	0.00201705	0.00276044	0.00527016	0.00560528	0.000885799	0.000903019
1309-06	0.00358022	0.00241927	0.00356148	0.00207416	0.0018227	0.00243238	0.00522705	0.00530926	0.00094844	0.00127681
1309-07	0.00351404	0.00236191	0.00342942	0.00191443	0.00168409	0.00222933	0.00508654	0.00469299	0.00100487	0.00129313
1309-08	0.00334696	0.00232276	0.00323907	0.00184301	0.00159144	0.0021689	0.00477602	0.00413845	0.00119526	0.00159435
1309-09	0.00319205	0.00220336	0.00309799	0.00190086	0.00158131	0.00219048	0.00455949	0.00398661	0.00110099	0.00135031
1309-10	0.00306508	0.00218273	0.00300445	0.00201391	0.00172657	0.00235937	0.00441858	0.00403097	0.000934301	0.00100039
1309-11	0.00297848	0.00220511	0.00292026	0.00219315	0.00198077	0.00259406	0.00435764	0.00428894	0.000716251	0.000586879
1309-12	0.00294322	0.00219899	0.00288832	0.00245472	0.00220886	0.00287918	0.004344	0.00476679	0.000716809	0.000481828
1310-01	0.00291377	0.00217824	0.00283379	0.00271301	0.00238659	0.00312634	0.00424517	0.00502079	0.000787414	0.000680166
1310-02	0.00285971	0.00216241	0.00275152	0.00274076	0.00253197	0.00317441	0.004146	0.00512342	0.000863219	0.000672939
1310-03	0.00276496	0.00208149	0.00259461	0.00257072	0.00239921	0.00298999	0.00405766	0.0051652	0.000887694	0.000853946
1310-04	0.00268516	0.00201848	0.00248831	0.00234642	0.00229621	0.00278081	0.00407106	0.00519859	0.000994662	0.000859707
1310-05	0.00258607	0.00198758	0.00241905	0.00202061	0.0020531	0.0025315	0.00415091	0.0053068	0.000975631	0.00106695
1310-06	0.00256735	0.00203064	0.00241715	0.00175835	0.00187924	0.00229392	0.00410906	0.00492721	0.000861348	0.00114376
1310-07	0.00253192	0.00200963	0.0023913	0.00165204	0.00172979	0.00213364	0.00396119	0.00434774	0.00113258	0.00139257
1310-08	0.00251553	0.00198358	0.00234798	0.00165503	0.00171022	0.00203878	0.0038133	0.00408411	0.00111221	0.00142335
1310-09	0.00248605	0.0019397	0.00231293	0.00174142	0.00172787	0.00209176	0.0036431	0.00392978	0.000974887	0.00126283
1310-10	0.0024872	0.0019185	0.00229522	0.00198389	0.00183903	0.00224061	0.00359477	0.00402392	0.000789604	0.000883107
1310-11	0.00240458	0.00193478	0.00227331	0.00219024	0.0020437	0.00247068	0.00352942	0.00409617	0.000691861	0.000634839
1310-12	0.00238954	0.00193993	0.0023052	0.00241777	0.00228397	0.00276479	0.00355271	0.00435715	0.000693318	0.000586014
1311-01	0.00231094	0.00193231	0.00229486	0.00257854	0.00243707	0.00299462	0.00356027	0.00467377	0.000726628	0.000525759
1311-02	0.00223245	0.00185348	0.00220022	0.00253835	0.00233314	0.00291248	0.00350876	0.00482253	0.000781665	0.000488738
1311-03	0.00211293	0.00180387	0.00208577	0.00233621	0.00221434	0.00271087	0.00347564	0.00483812	0.000998988	0.00074873
1311-04	0.00205082	0.00174395	0.00198261	0.00219304	0.00197955	0.00244057	0.00354033	0.00488634	0.00111975	0.00119239
1311-05	0.00199577	0.00172686	0.00190804	0.001967	0.00178356	0.00212374	0.00354171	0.00473603	0.00104133	0.00120682
1311-06	0.00197052	0.00170431	0.00189337	0.00179684	0.00154801	0.00186381	0.00345358	0.00421075	0.000968468	0.00135367
1311-07	0.00195289	0.00170916	0.00186692	0.00164889	0.00141767	0.00165684	0.00333675	0.00365869	0.00102496	0.00125846
1311-08	0.00193723	0.00172322	0.00187437	0.00162416	0.00140355	0.0016042	0.00318279	0.00323699	0.001128	0.0013153
1311-09	0.00189727	0.00178007	0.00187715	0.00165427	0.00145231	0.00165661	0.00305508	0.00299782	0.00114445	0.0012416
1311-10	0.0018903	0.00181107	0.00184578	0.00177987	0.00164312	0.00174723	0.00302726	0.00294814	0.000948387	0.0010359
1311-11	0.00189526	0.0017979	0.00184676	0.00198495	0.00187115	0.00194806	0.00301982	0.00307958	0.00080832	0.000669896
1311-12	0.00190056	0.0018256	0.00186257	0.00224017	0.00204588	0.00213782	0.00300988	0.00335594	0.000704443	0.000614578
1312-01	0.00189417	0.00186026	0.00184735	0.00245077	0.00225407	0.00222564	0.00297039	0.00355974	0.000745848	0.000560951
1312-02	0.00182895	0.00180544	0.00177307	0.00240461	0.00216995	0.00212406	0.00294477	0.00368428	0.000774895	0.00068698
1312-03	0.00179639	0.00175017	0.00169529	0.00233147	0.00202204	0.00195121	0.00294186	0.00377775	0.000965668	0.000884515
1312-04	0.00173695	0.00168412	0.00163676	0.00214721	0.0018595	0.00177367	0.00314044	0.0043338	0.00100424	0.000963154
1312-05	0.0016835	0.0016282	0.00157374	0.00189374	0.00164672	0.00154135	0.00331977	0.00448842	0.000974226	0.00109812
1312-06	0.00166993	0.00160805	0.0015287	0.00167886	0.00145903	0.00128427	0.00329794	0.00394652	0.000967251	0.00120225
1312-07	0.00165156	0.00156154	0.00151809	0.00153108	0.00129118	0.00120648	0.00315739	0.00340032	0.00109301	0.00143057
1312-08	0.00162847	0.00150742	0.00150058	0.00144775	0.00118534	0.00117446	0.00312808	0.00325136	0.00109375	0.00144469
1312-09	0.00162217	0.00149268	0.00149629	0.00147936	0.0012097	0.00121923	0.00304916	0.00320436	0.00105971	0.00126231
1312-10	0.00162692	0.00150959	0.00149275	0.00159222	0.00132111	0.00133715	0.00306472	0.00330653	0.00094504	0.000945133
1312-11	0.00164335	0.00149853	0.0014861	0.00173516	0.00148794	0.00149327	0.00306785	0.0034839	0.000799952	0.000565914
1312-12	0.00164492	0.00151246	0.0015078	0.00192953	0.00167957	0.00171557	0.00307181	0.00379867	0.00073663	0.000427522
1313-01	0.00166471	0.00146221	0.0014926	0.00215732	0.00178461	0.00182815	0.00311409	0.00397325	0.000777541	0.000658768
1313-02	0.00164103	0.00142071	0.00143108	0.00218245	0.0018218	0.00180419	0.00305471	0.00391778	0.00092185	0.000867959
1313-03	0.001595	0.00134082	0.00137478	0.00210513	0.00168017	0.0017171	0.00308685	0.00403423	0.000965033	0.000944463
1313-04	0.00151269	0.00132096	0.00131102	0.00187389	0.00158814	0.00158856	0.00319905	0.00420409	0.000910248	0.000926315
1313-05	0.00147638	0.00128802	0.00123529	0.0016676	0.00141258	0.00137079	0.00347043	0.00452882	0.00104536	0.00119121
1313-06	0.00148471	0.00128786	0.00121443	0.0014598	0.00124752	0.00119347	0.00344726	0.00408689	0.00103622	0.00133841
1313-07	0.00148677	0.00132334	0.00121663	0.00132971	0.00116113	0.00108988	0.0033403	0.00366661	0.00121569	0.00154586
1313-08	0.00147558	0.00132058	0.00119391	0.00128055	0.0011495	0.00106845	0.00317561	0.00343485	0.00110626	0.00142122
1313-09	0.00147303	0.00129534	0.00118391	0.00132434	0.00116739	0.00109413	0.00308293	0.00323891	0.00105779	0.00136066
1313-10	0.00149176	0.00128075	0.00117528	0.0014529	0.00126718	0.0011718	0.00301345	0.0032004	0.000887788	0.00087192
1313-11	0.00147404	0.00128304	0.00116692	0.00159259	0.00140037	0.00128813	0.00303009	0.00344486	0.000793036	0.000588299
1313-12	0.00150269	0.00131199	0.00118904	0.0018038	0.00155417	0.00145294	0.00303288	0.0036086	0.000832723	0.000714467
1314-01	0.00151041	0.00130305	0.00119106	0.00195571	0.00165206	0.00154633	0.00301291	0.00374231	0.00087598	0.000600468
1314-02	0.00150354	0.00129768	0.00119017	0.00195666	0.00170959	0.00158206	0.00300934	0.00394314	0.000948817	0.000528121
1314-03	0.00146143	0.00128005	0.00117741	0.00180918	0.0016708	0.00155156	0.00299121	0.00395653	0.00106631	0.000873292
1314-04	0.00144438	0.00127503	0.00111644	0.00172274	0.0015783	0.0013825	0.00309909	0.00427286	0.000995082	0.000944757
1314-05	0.00140316	0.00124606	0.00110124	0.00152385	0.00138996	0.00121447	0.00316771	0.00424645	0.00101622	0.00116874
1314-06	0.00139389	0.00123144	0.00111906	0.0013408	0.00120781	0.00109898	0.00306182	0.00368509	0.000935939	0.00119232
1314-07	0.00137021	0.0012519	0.00111959	0.00123433	0.00114446	0.000988306	0.00299606	0.00335477	0.00117723	0.00147226
1314-08	0.00132478	0.00126474	0.00111782	0.00115428	0.0010873	0.000963125	0.0028726	0.00312557	0.00108672	0.00127034
1314-09	0.00129765	0.00128044	0.00111587	0.00115187	0.00108269	0.000993114	0.00274011	0.0029482	0.000984002	0.00113896
1314-10	0.00128582	0.00130085	0.0011371	0.00123628	0.00120636	0.00113794	0.00272178	0.00295186	0.000818043	0.000821497
1314-11	0.0013084	0.00132103	0.00116067	0.0013851	0.00136551	0.00130111	0.00276645	0.00302034	0.000793346	0.000650955
1314-12	0.00131131	0.00132662	0.00118761	0.00153625	0.00153586	0.00144618	0.00276314	0.00330012	0.000758126	0.000580991
1315-01	0.00130633	0.00136089	0.00122856	0.00163286	0.00170584	0.00157706	0.00278311	0.00364995	0.000772342	0.000563864
1315-02	0.00126623	0.00132083	0.00121269	0.00159007	0.00163484	0.00158453	0.00280542	0.00385474	0.000836897	0.00060607
1315-03	0.00124276	0.00129273	0.00120679	0.00153836	0.00160654	0.00152689	0.00289536	0.00416557	0.0009468	0.000715096
1315-04	0.00119807	0.00127598	0.00122236	0.00140139	0.00149715	0.00138297	0.00297333	0.00425428	0.00102389	0.000956646
1315-05	0.00117789	0.00125402	0.00124062	0.00124823	0.00129179	0.00124037	0.00305554	0.00425967	0.000888042	0.000989661
1315-06	0.00117393	0.00125538	0.00128547	0.00110165	0.00112072	0.00114877	0.00309387	0.00402785	0.00102625	0.00152849
1315-07	0.00118345	0.00125455	0.00130049	0.00101676	0.00100772	0.00106284	0.00300067	0.0035083	0.00109076	0.00140756
1315-08	0.00118511	0.00125419	0.00132733	0.000995201	0.000965642	0.00106981	0.00284431	0.003076	0.00131187	0.00171888
1315-09	0.00119656	0.00127136	0.00135668	0.00106678	0.00102571	0.00112813	0.00277828	0.0030049	0.000970982	0.00122559
1315-10	0.00121226	0.00128763	0.00139435	0.00119254	0.00113364	0.00123339	0.00279212	0.00311511	0.000798716	0.000844635
1315-11	0.00123461	0.0013289	0.00142672	0.00131627	0.00130021	0.00140935	0.002869	0.00330837	0.000713662	0.000625298
1315-12	0.00124482	0.00137935	0.00143677	0.00149199	0.00148246	0.00158608	0.00295373	0.00355105	0.000783704	0.000702979
1316-01	0.00126639	0.00137463	0.00139652	0.00163598	0.00162642	0.00165161	0.00299196	0.00363005	0.000782239	0.000538543
1316-02	0.00126506	0.00131046	0.00135226	0.00162574	0.00160271	0.00164325	0.00300031	0.00374398	0.000961903	0.000778781
1316-03	0.00122491	0.00127459	0.0013152	0.00152759	0.00156772	0.00156978	0.00305724	0.00384563	0.00105237	0.00100334
1316-04	0.00121816	0.00124675	0.00129164	0.00141293	0.00144801	0.00145469	0.00315994	0.00397405	0.00110276	0.00110076
1316-05	0.00122249	0.00121227	0.00126354	0.00126397	0.00126495	0.00126235	0.00335876	0.00441267	0.000986192	0.00102569
1316-06	0.00124712	0.00119277	0.00125909	0.00114529	0.00109345	0.00110246	0.00327586	0.00378556	0.0009473	0.00125222
1316-07	0.00125265	0.00117601	0.00126672	0.00104429	0.000993214	0.00101282	0.00319099	0.00340406	0.000960524	0.0011341
1316-08	0.00126328	0.00117844	0.00127189	0.00102006	0.00097352	0.000994412	0.00308314	0.00312194	0.00119073	0.00152282
1316-09	0.00125404	0.00117212	0.00125234	0.00103297	0.000991635	0.00102207	0.0029787	0.00299588	0.00100003	0.00113138
1316-10	0.00126026	0.00117784	0.00124944	0.00116094	0.00108322	0.00111993	0.00290777	0.00295589	0.000823449	0.000753277
1316-11	0.00127928	0.00119202	0.00125084	0.00133215	0.00126227	0.00127179	0.00293616	0.00314879	0.000786844	0.000646202
1316-12	0.00129976	0.00120649	0.00128498	0.00148867	0.00146363	0.00143982	0.00296797	0.00336486	0.000767795	0.000567502
1317-01	0.00134717	0.00119063	0.00128631	0.00165069	0.00154068	0.00154381	0.00296567	0.00357722	0.000779765	0.000612797
1317-02	0.00137256	0.00119047	0.00124585	0.00168614	0.00155581	0.00154166	0.00292567	0.00361569	0.000938919	0.000741344
1317-03	0.00137915	0.00119066	0.00123461	0.00165955	0.00150827	0.00154351	0.00294243	0.00372276	0.000945423	0.000802723
1317-04	0.00137215	0.0011794	0.00123234	0.00157973	0.00140132	0.00146829	0.00303972	0.00383418	0.00112517	0.000940872
1317-05	0.00134788	0.00118915	0.00124738	0.00139727	0.0013232	0.00136749	0.00322167	0.00404133	0.000891753	0.00104935
1317-06	0.00134801	0.0012044	0.00128581	0.00125142	0.00123444	0.00124801	0.00318957	0.00369434	0.00103344	0.00158179
1317-07	0.00132152	0.00123936	0.00130086	0.00111562	0.00119013	0.00118853	0.00315103	0.00338804	0.00103827	0.0014435
1317-08	0.00129035	0.00122816	0.00132097	0.00104457	0.00115398	0.00120415	0.00305854	0.00320619	0.00114415	0.00137288
1317-09	0.00130598	0.0012056	0.00134274	0.00105027	0.00113139	0.00124096	0.00299986	0.00314619	0.00122737	0.00153466
1317-10	0.00130393	0.00121139	0.0013805	0.00116085	0.00121654	0.00132933	0.0029911	0.0031699	0.000846687	0.000835308
1317-11	0.00132173	0.00123129	0.0013857	0.00133244	0.00134773	0.00143595	0.0030135	0.00344391	0.000772178	0.000762906
1317-12	0.00137097	0.00126746	0.00141859	0.00157642	0.00154384	0.00162292	0.00306417	0.00371738	0.000774155	0.000485776
1318-01	0.00136474	0.00129738	0.00145775	0.00171023	0.00173748	0.00181294	0.00310127	0.00408843	0.000882151	0.000629174
1318-02	0.00132129	0.00128423	0.00149108	0.0016962	0.00176096	0.00188453	0.00306452	0.00416673	0.000907921	0.000605791
1318-03	0.00127955	0.00125863	0.00149666	0.00162389	0.00172333	0.00187602	0.00313373	0.00434663	0.00108854	0.00077456
1318-04	0.0012478	0.00125663	0.00145814	0.00153904	0.00163442	0.0017332	0.00319264	0.00444013	0.00106984	0.000901466
1318-05	0.001187	0.00126362	0.00144736	0.00131361	0.00142703	0.00157973	0.00325112	0.00439935	0.000957061	0.00103791
1318-06	0.00119098	0.00129229	0.00144849	0.00119507	0.00128297	0.00142096	0.00324112	0.00410131	0.000915601	0.00118587
1318-07	0.00123854	0.00132784	0.00142287	0.00119238	0.00120713	0.00134578	0.00310807	0.00360937	0.000953649	0.0012711
1318-08	0.00125387	0.00134868	0.00143932	0.00121577	0.00121685	0.00136689	0.00294957	0.00320595	0.00115905	0.00141228
1318-09	0.00126627	0.0013579	0.00142454	0.00125284	0.00124948	0.00137554	0.00277682	0.00301519	0.00112675	0.00141982
1318-10	0.00128135	0.00135606	0.00143866	0.00136878	0.00137435	0.00147309	0.00270946	0.00301149	0.000828544	0.000857737
1318-11	0.00130159	0.00135445	0.00147659	0.00150895	0.00152454	0.00162338	0.00275989	0.0031046	0.000617445	0.000458354
1318-12	0.00133042	0.00137879	0.00151728	0.00170593	0.00169313	0.00184535	0.00278218	0.00327845	0.000770683	0.000573115
1319-01	0.00134069	0.00137761	0.00151808	0.00178266	0.00179184	0.00200953	0.00280225	0.00360436	0.000845788	0.000610793
1319-02	0.00134502	0.00136066	0.00147913	0.00177738	0.00174862	0.00200442	0.00279964	0.00381717	0.000893938	0.000674882
1319-03	0.00133424	0.00133461	0.00142152	0.00170819	0.00165504	0.00192363	0.00281721	0.0039361	0.000958958	0.000666755
1319-04	0.00131934	0.00134043	0.00138989	0.00156501	0.00160109	0.00177855	0.00293079	0.00423426	0.00101785	0.000949217
1319-05	0.00132435	0.00130708	0.00135503	0.001431	0.00145152	0.00158571	0.00304037	0.0042619	0.000952705	0.0010351
1319-06	0.00132517	0.00129196	0.00135587	0.00126299	0.00130288	0.00139967	0.00299246	0.00385253	0.00101448	0.00133223
1319-07	0.00135499	0.00126631	0.00136007	0.00115431	0.00119472	0.00128722	0.00287765	0.00335056	0.00105077	0.00144286
1319-08	0.0013762	0.00124465	0.00137181	0.00109602	0.00114896	0.00129633	0.00277952	0.0030043	0.00118909	0.00145072
1319-09	0.0013927	0.00125667	0.00139488	0.00109624	0.00115182	0.00134082	0.00275374	0.0028871	0.0011304	0.00128708
1319-10	0.00139528	0.00126629	0.00144149	0.00119074	0.00124151	0.00143575	0.00269976	0.00287773	0.00085442	0.000889777
1319-11	0.00141894	0.0012912	0.00147187	0.00135345	0.00140435	0.00159119	0.00280011	0.00314514	0.000820978	0.000709074
1319-12	0.00147154	0.00129313	0.00150009	0.00158933	0.00155147	0.00178767	0.00287986	0.00346061	0.000770287	0.000617971
1320-01	0.00148971	0.00129446	0.00145719	0.001761	0.00168709	0.00187118	0.00288517	0.00370297	0.000762391	0.000516315
1320-02	0.0014865	0.00126625	0.00140474	0.00180896	0.0016944	0.00185003	0.0028904	0.00383769	0.000880674	0.000720159
1320-03	0.00146006	0.00122263	0.00136477	0.00172468	0.00161366	0.00173965	0.00294686	0.00397879	0.00105547	0.000883528
1320-04	0.00145629	0.0012026	0.00135015	0.00164792	0.00151026	0.00163429	0.00307831	0.00417796	0.00106817	0.000921214
1320-05	0.00142621	0.001197	0.00132631	0.00144685	0.00136857	0.00137854	0.00324886	0.00440019	0.00101089	0.00120351
1320-06	0.00141722	0.00123956	0.0013423	0.00128808	0.00123451	0.00123404	0.00323362	0.00410188	0.00101841	0.00131434
1320-07	0.0014012	0.00126144	0.001406	0.00120134	0.00116216	0.00116668	0.00313009	0.00364127	0.00106443	0.00145392
1320-08	0.00139378	0.00126621	0.00145429	0.00116773	0.00115989	0.00119001	0.00298921	0.00331375	0.00110409	0.00136867
1320-09	0.0014155	0.00127983	0.00148286	0.00120204	0.00117316	0.00127166	0.00294545	0.00326864	0.00105206	0.00124302
1320-10	0.00138568	0.00128465	0.00150671	0.00129875	0.00128272	0.00141485	0.00293211	0.00332485	0.000892648	0.00102794
1320-11	0.00138484	0.00128595	0.00150982	0.00145235	0.00143302	0.00157175	0.0029138	0.00345256	0.000742713	0.000642397
1320-12	0.00140185	0.00128241	0.00155434	0.00163553	0.00157883	0.00178599	0.00293029	0.00363459	0.000692602	0.000539004
1321-01	0.00142679	0.00128345	0.00155515	0.00180532	0.00164485	0.00188857	0.00292099	0.00376133	0.000847086	0.000575326
1321-02	0.00135618	0.00130159	0.00152469	0.00173339	0.00169748	0.00191897	0.00290998	0.00380353	0.00078031	0.000632018
1321-03	0.00132777	0.00131075	0.0014894	0.00165233	0.00166811	0.00184383	0.00292411	0.00382048	0.000963014	0.000801852
1321-04	0.00132233	0.00129689	0.0014404	0.00155052	0.00154115	0.00168288	0.00300616	0.00401375	0.000999877	0.000978013
1321-05	0.00130572	0.00130162	0.00143093	0.00137788	0.00140608	0.00151993	0.00313843	0.00408056	0.00100869	0.00121863
1321-06	0.00130215	0.00133652	0.00144241	0.00120599	0.00131798	0.00134981	0.00313586	0.00371262	0.000862464	0.00100427
1321-07	0.00132492	0.00136128	0.00144145	0.00112267	0.00124199	0.00123542	0.00304087	0.00326371	0.000916191	0.00102577
1321-08	0.00135922	0.00136523	0.00145652	0.00111758	0.00121701	0.00120625	0.00291946	0.00296394	0.00126805	0.0015227
1321-09	0.00137097	0.00135509	0.00148084	0.00117077	0.0011955	0.00126135	0.00284891	0.00282415	0.001112	0.00137923
1321-10	0.00137901	0.00135704	0.00146793	0.0013363	0.00128787	0.00136439	0.00282009	0.00281028	0.000780947	0.000821354
1321-11	0.00141878	0.0013704	0.00146272	0.00153657	0.00144666	0.00152337	0.00287512	0.00295546	0.000765352	0.000769731
1321-12	0.00146938	0.00142285	0.00147303	0.00174944	0.00166803	0.00174515	0.00291557	0.00325675	0.000708101	0.000505242
1322-01	0.00148956	0.00145365	0.00146637	0.00186469	0.00182402	0.00194377	0.00293013	0.00359722	0.000777384	0.000497808
1322-02	0.0014845	0.00147542	0.00141495	0.00184291	0.00183456	0.00189338	0.00292483	0.00369108	0.000877624	0.000794592
1322-03	0.00147399	0.0014758	0.00136919	0.00178061	0.0017557	0.00184097	0.00287558	0.00373469	0.000874493	0.000740322
1322-04	0.00144838	0.00147608	0.00131233	0.00162973	0.00165687	0.00166898	0.00305806	0.00405697	0.00104363	0.00102507
1322-05	0.00139827	0.00142876	0.00126484	0.00141229	0.00144457	0.00145195	0.00316617	0.00417233	0.0009176	0.0010078
1322-06	0.00138394	0.00142661	0.00124772	0.0012443	0.00128402	0.00123707	0.0031248	0.00379315	0.000903927	0.00118066
1322-07	0.00141397	0.00144726	0.00126935	0.001156	0.001176	0.00111634	0.00308765	0.00344006	0.00105971	0.00138717
1322-08	0.00139724	0.00144219	0.00127076	0.0010974	0.00116424	0.0011191	0.00295777	0.00311518	0.00112031	0.00147473
1322-09	0.00137955	0.00143424	0.00129422	0.00110106	0.00122618	0.00119439	0.00289527	0.00305738	0.00106868	0.00133077
1322-10	0.00139192	0.0014312	0.00129832	0.00119996	0.00131809	0.00128543	0.00281427	0.00301256	0.000907726	0.00103603
1322-11	0.00139912	0.00144072	0.00130971	0.0013631	0.00147066	0.00140667	0.00280102	0.00316513	0.000763058	0.000601041
1322-12	0.00145546	0.0014623	0.00132892	0.00159306	0.00165547	0.00157149	0.00285597	0.00344881	0.000695556	0.000530664
1323-01	0.00150067	0.00149021	0.00129881	0.00172767	0.00183891	0.00165511	0.00287629	0.0037322	0.000815166	0.00064981
1323-02	0.00147632	0.00145797	0.00126887	0.00171599	0.00188252	0.00166984	0.00287307	0.00375144	0.000887028	0.000653806
1323-03	0.0014078	0.0014036	0.0012368	0.0015865	0.00176448	0.00161089	0.00284623	0.00362852	0.000934796	0.000887105
1323-04	0.00137079	0.00138031	0.00121632	0.00148384	0.0016364	0.00152481	0.00294118	0.00399935	0.000959143	0.000873569
1323-05	0.00136508	0.00136034	0.00119445	0.00137533	0.00146653	0.00130966	0.00307087	0.00408285	0.000854937	0.000844614
1323-06	0.00137657	0.0013556	0.00120186	0.00123071	0.00126828	0.00117409	0.0030457	0.00368899	0.000915207	0.00128187
1323-07	0.00135895	0.00133903	0.00121196	0.00110818	0.00114131	0.0011404	0.00293635	0.00321747	0.00109395	0.00144489
1323-08	0.00134628	0.00136807	0.00123313	0.00108491	0.00112696	0.00116689	0.00285828	0.00290812	0.00115037	0.00143488
1323-09	0.00132475	0.00135973	0.00123211	0.00109086	0.00113507	0.00119413	0.00273762	0.00268624	0.00113543	0.00141566
1323-10	0.00133227	0.0013546	0.00123682	0.00117805	0.00124551	0.00128484	0.00273166	0.0027282	0.000895236	0.00107183
1323-11	0.00134489	0.00136497	0.00125933	0.00136049	0.0014188	0.00145697	0.00273498	0.00285938	0.000724526	0.000643985
1323-12	0.00134051	0.00138945	0.00129118	0.00152337	0.00163568	0.00162769	0.00276677	0.00304444	0.000728889	0.000539316
1324-01	0.00133693	0.00138841	0.00134582	0.00163483	0.00174747	0.0017702	0.00282971	0.00338664	0.000806901	0.000508192
1324-02	0.00131292	0.00135175	0.00133539	0.00160591	0.00173937	0.00173938	0.00282946	0.00359496	0.000811807	0.000553243
1324-03	0.00131944	0.00133354	0.00137552	0.00155502	0.0016854	0.00171783	0.00286502	0.00376745	0.0010224	0.000791502
1324-04	0.00132386	0.00133446	0.00137032	0.00151059	0.00157476	0.00159597	0.00294185	0.00386048	0.00101108	0.000931485
1324-05	0.00129957	0.00132112	0.00134325	0.00134734	0.00142827	0.00138655	0.00311757	0.00414804	0.000866557	0.000949872
1324-06	0.0013251	0.00130569	0.00133075	0.00123992	0.00125692	0.00124316	0.00316301	0.00392026	0.000937012	0.00122762
1324-07	0.00132329	0.00129919	0.00132179	0.00112972	0.00113397	0.00112703	0.00305487	0.00344895	0.00102284	0.00123008
1324-08	0.00129832	0.00130293	0.00130366	0.00106622	0.00108233	0.00105754	0.0029345	0.00308185	0.00112772	0.00165854
1324-09	0.001304	0.00127816	0.00133258	0.00106767	0.00107131	0.00112439	0.00287375	0.00299923	0.00110755	0.00144644
1324-10	0.00129152	0.0013075	0.0013717	0.00116435	0.00120119	0.00126087	0.00285433	0.00299011	0.00088081	0.000843874
1324-11	0.00130822	0.00134877	0.00138791	0.00131318	0.00139207	0.00137605	0.00288708	0.00323431	0.000744768	0.00066046
1324-12	0.0013588	0.00136505	0.00139805	0.00156886	0.00159869	0.00153672	0.00297766	0.00360674	0.000805658	0.000607755
1325-01	0.00141351	0.00136625	0.00139758	0.00177273	0.00171934	0.00167981	0.00295404	0.00374162	0.000893773	0.000703024
1325-02	0.00142076	0.00133899	0.00136513	0.00181669	0.00172402	0.00167927	0.00295232	0.00383477	0.000872359	0.000756986
1325-03	0.00138324	0.00133568	0.00132041	0.00181556	0.00163895	0.0016215	0.00299272	0.00394068	0.000890522	0.000652033
1325-04	0.00135327	0.00136088	0.00129096	0.00171736	0.00154291	0.00152788	0.0030653	0.00410399	0.000957973	0.000963222
1325-05	0.00134013	0.00138014	0.00124834	0.00155724	0.00136401	0.00133753	0.00309747	0.00400208	0.000958075	0.0009412
1325-06	0.00132025	0.00142052	0.00124037	0.00136057	0.00121942	0.0011749	0.00310937	0.00369767	0.000870657	0.000995592
1325-07	0.00132433	0.00144481	0.00128306	0.00124199	0.00113187	0.00112019	0.0030645	0.0033746	0.00112581	0.00153441
1325-08	0.00131304	0.00143688	0.00126537	0.00119074	0.00107694	0.00108824	0.00293386	0.0031475	0.00115994	0.00130479
1325-09	0.00129919	0.00143694	0.00125636	0.00120394	0.00112018	0.0010983	0.00284333	0.0030775	0.00107506	0.00134729
1325-10	0.00131046	0.00144054	0.00125419	0.00127614	0.00126845	0.00117958	0.00280158	0.00302368	0.00091632	0.000926499
1325-11	0.00130438	0.00142353	0.00127051	0.00140159	0.00144219	0.00131642	0.00283194	0.00322048	0.000804651	0.000640512
1325-12	0.00131747	0.00143746	0.00129832	0.00157164	0.00162153	0.00146323	0.00286415	0.00342992	0.000729355	0.000490409
1326-01	0.00131522	0.00145841	0.00127862	0.00169414	0.00175197	0.00156525	0.00291263	0.00371358	0.000718108	0.000472063
1326-02	0.00129774	0.00142691	0.00125016	0.00169293	0.00172724	0.00155386	0.00293124	0.003968	0.000821592	0.000697763
1326-03	0.00125623	0.00138322	0.00120816	0.00158866	0.00166868	0.00146555	0.00296826	0.00402459	0.00104676	0.000966894
1326-04	0.00122502	0.00135151	0.0011798	0.00144846	0.00156118	0.00135657	0.00300438	0.00409297	0.000984083	0.000959505
1326-05	0.0012101	0.00135487	0.00117336	0.00128401	0.00144589	0.00121719	0.00318225	0.00438345	0.000891093	0.000971506
1326-06	0.00123007	0.00135685	0.00118633	0.00115487	0.00125861	0.00110712	0.00315624	0.00393189	0.000886394	0.00101441
1326-07	0.0012399	0.00133639	0.0012037	0.00107769	0.0011457	0.00100646	0.00304317	0.00338019	0.00106876	0.00130439
1326-08	0.00124853	0.00130066	0.00119667	0.00108435	0.00109419	0.000985436	0.00293639	0.00312275	0.0010837	0.00130511
1326-09	0.00126901	0.001305	0.00120525	0.00116035	0.00111022	0.0010519	0.00283039	0.00303073	0.000974465	0.00113935
1326-10	0.00126194	0.00129337	0.00122236	0.00127676	0.00120706	0.0012076	0.00284099	0.00308847	0.00096267	0.001143
1326-11	0.00125853	0.00131689	0.00125152	0.00139555	0.00138599	0.00136364	0.00283861	0.00327342	0.000675509	0.000559756
1326-12	0.00127677	0.00134523	0.00128434	0.00153149	0.00159264	0.00153823	0.00292118	0.00375488	0.000777959	0.000615946
1327-01	0.00128643	0.00133255	0.00129515	0.001672	0.00173697	0.00168771	0.00294372	0.00402334	0.000790561	0.000558375
1327-02	0.00127507	0.0013045	0.0012682	0.00172629	0.00181663	0.00168162	0.00288367	0.00397433	0.000825505	0.000601522
1327-03	0.00123727	0.00126055	0.00126794	0.00162245	0.00175853	0.00162367	0.00297599	0.00429733	0.000958518	0.000856284
1327-04	0.00124843	0.00121973	0.0012915	0.00150164	0.00162215	0.00152129	0.00298753	0.00424786	0.00102762	0.000897415
1327-05	0.00125418	0.00119083	0.00129623	0.00137015	0.0014061	0.0013656	0.00307468	0.00428307	0.00105683	0.00121879
1327-06	0.00126725	0.00118418	0.00130968	0.001235	0.00126033	0.001191	0.00304036	0.0038676	0.000986823	0.00128685
1327-07	0.00126661	0.00118929	0.00130137	0.00112372	0.0011419	0.00107122	0.00296415	0.00336145	0.000974149	0.00119682
1327-08	0.00125445	0.00120761	0.00129037	0.00107822	0.00113383	0.00099827	0.00283839	0.00314119	0.00102866	0.00125307
1327-09	0.0012604	0.00122637	0.00130009	0.00109582	0.00117806	0.00105732	0.00270305	0.0029508	0.00098953	0.00122462
1327-10	0.00127234	0.00125348	0.00128988	0.00119305	0.00129201	0.00118838	0.0026115	0.00289572	0.000822424	0.000863378
1327-11	0.00128077	0.00127588	0.00129884	0.00133056	0.00149819	0.00133663	0.00261982	0.0029741	0.000722856	0.000652831
1327-12	0.00131434	0.00132976	0.00133355	0.00153882	0.00173941	0.00150878	0.00267931	0.0032757	0.000765765	0.000476689
1328-01	0.00133075	0.00135682	0.00136376	0.00169922	0.00184713	0.00162654	0.00268881	0.00344724	0.000844176	0.000564246
1328-02	0.00130565	0.00137036	0.00137194	0.0016949	0.00186988	0.00165942	0.00265009	0.00344673	0.000939459	0.000826457
1328-03	0.0012702	0.00138219	0.00132854	0.00162305	0.0017946	0.00160237	0.00267129	0.00356285	0.00103775	0.000866831
1328-04	0.00125958	0.00138659	0.00126025	0.00153464	0.00164372	0.00143715	0.00280916	0.00387274	0.00101717	0.00105203
1328-05	0.00126245	0.00138291	0.00124228	0.00139213	0.00143242	0.00128078	0.00294686	0.00406616	0.000989078	0.00104609
1328-06	0.00129543	0.00138261	0.00121797	0.00125418	0.00125022	0.0010842	0.0029957	0.00380768	0.0010082	0.00137191
1328-07	0.0012924	0.00139183	0.00120565	0.00116868	0.00115654	0.0010164	0.00292622	0.00335473	0.000988088	0.00120924
1328-08	0.00128834	0.00139361	0.00119714	0.00113838	0.00113552	0.00101327	0.00281214	0.00300965	0.00121022	0.00136335
1328-09	0.00128557	0.00138882	0.00119328	0.00116845	0.00117016	0.00103437	0.00274655	0.00286206	0.00112236	0.0013597
1328-10	0.00128326	0.00141145	0.00120605	0.00125411	0.001311	0.00114121	0.00274163	0.00290235	0.000835864	0.00088492
1328-11	0.00125892	0.00143479	0.00123092	0.00136195	0.00144768	0.00132096	0.00284039	0.00317772	0.000772805	0.0006399
1328-12	0.00131205	0.00147324	0.00122737	0.00158972	0.00166624	0.00144461	0.0029231	0.0035638	0.000723777	0.000548458
1329-01	0.00135514	0.00150355	0.00122773	0.00177132	0.00183291	0.00153976	0.00289356	0.00374143	0.00800765	0.0206204
1329-02	0.00130222	0.00146572	0.00123781	0.00171827	0.00183562	0.00158134	0.00292511	0.00379909	0.0187245	0.0477868
1329-03	0.00128001	0.00143387	0.00123252	0.00171608	0.00177598	0.00158272	0.00301284	0.00407857	0.027016	0.0682091
1329-04	0.00120365	0.0013991	0.00121002	0.00152448	0.0016535	0.00147677	0.00308316	0.00421433	0.03277	0.081289
1329-05	0.00115649	0.00134978	0.00120096	0.00130373	0.00141912	0.00134774	0.00310103	0.00407968	0.0349196	0.0863912
1329-06	0.0011682	0.0013518	0.00122938	0.00116693	0.00128863	0.00122202	0.00310636	0.0037687	0.0350599	0.0841925
1329-07	0.00122099	0.00136219	0.00123233	0.00113054	0.00117625	0.00112989	0.00306223	0.00347054	0.0341806	0.079975
1329-08	0.0012159	0.00137012	0.00121791	0.00107232	0.00112826	0.00109508	0.00300862	0.00329712	0.0324638	0.074269
1329-09	0.00122753	0.00140735	0.00124148	0.00110776	0.00120927	0.00114206	0.00297728	0.00326819	0.0305088	0.0705147
1329-10	0.010924	0.0102908	0.0128717	0.0292327	0.0267072	0.0328848	0.0118599	0.0298816	0.0282171	0.0661421
1329-11	0.0485508	0.04415	0.048174	0.123839	0.107343	0.122151	0.0410397	0.110676	0.0267164	0.0629945
1329-12	0.0745245	0.0688592	0.070564	0.185162	0.165302	0.176392	0.0609278	0.161547	0.0250267	0.0603655
1330-01	0.0876438	0.082693	0.0855462	0.21876	0.20216	0.217875	0.0717408	0.191437	0.0225662	0.0560751
1330-02	0.0870767	0.0835478	0.0890233	0.218569	0.205475	0.228422	0.0765324	0.204971	0.0191562	0.0470049
1330-03	0.0757991	0.0796444	0.0828393	0.19236	0.200438	0.212062	0.0761152	0.203997	0.0154554	0.0370517
1330-04	0.0636815	0.0671292	0.0683955	0.158418	0.164789	0.173683	0.0710177	0.187055	0.0116972	0.0273953
1330-05	0.0510996	0.0550719	0.0540124	0.121717	0.130185	0.131963	0.0625403	0.15789	0.0088259	0.0197409
1330-06	0.0408671	0.0448625	0.0450869	0.0896087	0.0971215	0.102624	0.0540395	0.12722	0.007055	0.0148101
1330-07	0.0340909	0.0372901	0.0390564	0.0683002	0.0723909	0.0822599	0.0467381	0.101806	0.00575587	0.0110815
1330-08	0.0308856	0.0329939	0.0368549	0.058915	0.0607546	0.074035	0.0417365	0.0855619	0.00483941	0.00842541
1330-09	0.0291445	0.03137	0.0341562	0.0551928	0.0574837	0.0675516	0.0386884	0.0771658	0.00416914	0.00706771
1330-10	0.0274268	0.0300937	0.0323641	0.0534511	0.0574215	0.0641583	0.0359174	0.071294	0.00335546	0.00546437
1330-11	0.0259985	0.0281838	0.0314441	0.0524221	0.0561521	0.0642903	0.0335053	0.0673353	0.0027596	0.00420684
1330-12	0.024304	0.0264541	0.0297194	0.0503798	0.0553248	0.0634253	0.0311772	0.0635764	0.00236827	0.00359193
1331-01	0.0213271	0.023819	0.0277294	0.0457327	0.0505669	0.0609425	0.0279632	0.0588213	0.00198909	0.00263318
1331-02	0.0182689	0.0208577	0.0251137	0.0382514	0.0448232	0.056131	0.0244409	0.0511549	0.00166295	0.0020948
1331-03	0.0147356	0.0169407	0.0207021	0.0291491	0.0351961	0.0449785	0.021003	0.0436279	0.00146388	0.00149412
1331-04	0.0121045	0.0135678	0.0163899	0.0222288	0.0261771	0.033733	0.0183583	0.0372823	0.00132575	0.00142358
1331-05	0.0101707	0.0117097	0.0138432	0.0172778	0.0210793	0.0267688	0.0163827	0.0313738	0.00119124	0.0013902
1331-06	0.00866936	0.0101288	0.012144	0.0131727	0.0165399	0.0216205	0.0144141	0.0252028	0.00109514	0.0013334
1331-07	0.00745134	0.00912506	0.0109976	0.0100002	0.0133376	0.0177994	0.0126179	0.0195917	0.0011309	0.00140876
1331-08	0.00685771	0.00829662	0.0102914	0.00876794	0.0112647	0.0159539	0.0112818	0.0159683	0.00128673	0.00161436
1331-09	0.0065561	0.00795912	0.009964	0.00853178	0.0107165	0.0153376	0.0104286	0.0142218	0.00118059	0.00149121
1331-10	0.00639494	0.00763004	0.00977587	0.0088429	0.0104848	0.0154413	0.00983814	0.0134973	0.000968526	0.00114648
1331-11	0.00614317	0.00726294	0.00943542	0.00903626	0.0102928	0.0158585	0.00944484	0.0136352	0.000817918	0.000702942
1331-12	0.00590676	0.00675418	0.00900316	0.00929662	0.00998132	0.015844	0.00897757	0.013737	0.000763577	0.000539436
1332-01	0.00544364	0.00611341	0.00837162	0.00899268	0.00953436	0.015101	0.00847464	0.0136894	0.000866387	0.000579765
1332-02	0.00456679	0.00546587	0.00776738	0.00735357	0.00859544	0.0143115	0.00776531	0.0126851	0.000903732	0.000583545
1332-03	0.00401156	0.00484503	0.00693471	0.00617386	0.00732032	0.0123204	0.00718394	0.0118588	0.000983894	0.000729016
1332-04	0.00357599	0.0043074	0.00625472	0.00514429	0.00614114	0.0104574	0.00700486	0.0115211	0.000997471	0.00082413
1332-05	0.00325294	0.0039321	0.00570076	0.00421115	0.00508309	0.00867491	0.00682596	0.0107123	0.00109186	0.00116623
1332-06	0.00306264	0.00365106	0.00533797	0.00351793	0.00426527	0.00731601	0.00649036	0.00906633	0.00101038	0.00138608
1332-07	0.0029903	0.00347103	0.00506218	0.00316417	0.00365411	0.00636654	0.0060568	0.00759236	0.000996121	0.00120513
1332-08	0.00292214	0.00333889	0.00488412	0.00297464	0.00337697	0.00581958	0.0056596	0.0066708	0.00104808	0.00127917
1332-09	0.00287139	0.00332808	0.00472191	0.00296657	0.00345954	0.0055877	0.00541808	0.00635495	0.00109854	0.00131998
1332-10	0.00291866	0.0033277	0.00470176	0.00317772	0.00374358	0.00585561	0.00523412	0.00622598	0.00086525	0.000981581
1332-11	0.00292643	0.00334732	0.0046739	0.00346606	0.00408187	0.00630561	0.0051265	0.00629877	0.000825599	0.000727199
1332-12	0.00289045	0.00339117	0.0045757	0.0037605	0.00451323	0.00675432	0.00497299	0.00636545	0.0007897	0.000680329
1333-01	0.00284388	0.0032314	0.00442248	0.00396781	0.00458784	0.00685485	0.0048264	0.00643431	0.000760544	0.000475044
1333-02	0.0027013	0.00299291	0.00419475	0.0038676	0.00432792	0.0065291	0.00465429	0.00638409	0.000905033	0.000538944
1333-03	0.00257571	0.00283346	0.00385124	0.00359907	0.00407694	0.00565832	0.00458514	0.00634774	0.00103313	0.000763667
1333-04	0.00243154	0.00267519	0.00356481	0.00318825	0.00364861	0.00472003	0.00453464	0.0061846	0.00113969	0.00111859
1333-05	0.00229789	0.00259544	0.00335535	0.00271506	0.00324369	0.00402264	0.00450421	0.00588972	0.000984945	0.00117457
1333-06	0.00225677	0.00256319	0.00315604	0.00238447	0.00280782	0.00323875	0.00454606	0.00572304	0.000930345	0.00123704
1333-07	0.00216783	0.00254038	0.00305706	0.00209849	0.00253357	0.00285723	0.00419143	0.00455213	0.00103898	0.00139065
1333-08	0.00212891	0.00251135	0.00294554	0.00197352	0.00245596	0.00263629	0.00398457	0.00408486	0.00115012	0.00137959
1333-09	0.00216986	0.00247922	0.0028951	0.00205327	0.00246584	0.00269421	0.0038549	0.00404286	0.00103222	0.00110127
1333-10	0.0021703	0.00247511	0.00288592	0.00229645	0.00267446	0.00289479	0.00376923	0.00406369	0.000851289	0.00089039
1333-11	0.00216526	0.00244704	0.00287756	0.00260505	0.00294448	0.00320534	0.0037133	0.0042163	0.000788966	0.000728862
1333-12	0.00216856	0.00243161	0.00287652	0.00278525	0.00315821	0.00356337	0.00372024	0.00452646	0.000780708	0.000565404
1334-01	0.00214565	0.00240557	0.00284028	0.00289735	0.00324369	0.0038	0.0036681	0.00488755	0.00079315	0.000555242
1334-02	0.00205472	0.00225853	0.00268209	0.00277116	0.00302031	0.00358411	0.0035795	0.00505023	0.000903168	0.000707347
1334-03	0.00198736	0.0021553	0.00254036	0.00256511	0.00280604	0.00329669	0.00362864	0.0054127	0.000935334	0.000738816
1334-04	0.00192195	0.00203864	0.00242046	0.00232941	0.00248439	0.00290637	0.00357079	0.0051964	0.00101658	0.000972277
1334-05	0.00186433	0.0019316	0.00232365	0.00207271	0.0021206	0.00255163	0.00359669	0.00509483	0.000896323	0.00111559
1334-06	0.0018435	0.00185582	0.00226533	0.00181403	0.00176878	0.00223194	0.00360175	0.00483679	0.000875334	0.00109226
1334-07	0.00182347	0.00183644	0.00220694	0.00160602	0.00158352	0.00202607	0.00341192	0.00413881	0.00105755	0.00139781
1334-08	0.00180758	0.00178881	0.00212118	0.00151383	0.00141353	0.00184416	0.00325799	0.00369323	0.00113646	0.00142244
1334-09	0.00179339	0.00178313	0.00212182	0.00154495	0.00140772	0.00184731	0.00316722	0.0035431	0.00111304	0.00136752
1334-10	0.0017695	0.00176319	0.00210567	0.00166655	0.00150693	0.00196704	0.00307525	0.0035582	0.000971864	0.000936091
1334-11	0.0017554	0.00174933	0.00213508	0.00184969	0.00169344	0.00222939	0.0030628	0.00373494	0.000694587	0.000499672
1334-12	0.00175821	0.00173124	0.00212981	0.00207839	0.00187474	0.00253196	0.00305691	0.00392329	0.000709758	0.000618514
1335-01	0.0016988	0.00171202	0.00210758	0.00223445	0.00200884	0.00269385	0.00303112	0.00408708	0.000761014	0.000499899
1335-02	0.00160358	0.00167371	0.00205656	0.00216101	0.00197721	0.0027048	0.00303957	0.00429971	0.000897241	0.000627616
1335-03	0.00153694	0.00162242	0.00196368	0.00203656	0.00191139	0.00254423	0.00300053	0.00429262	0.00102408	0.000793753
1335-04	0.00147457	0.00156745	0.00187953	0.00185532	0.0017644	0.00232055	0.0031093	0.00452511	0.000979872	0.000871806
1335-05	0.00141907	0.00149109	0.00183433	0.00160472	0.00150559	0.00209719	0.00324326	0.00472067	0.000994841	0.00123628
1335-06	0.0014008	0.00147114	0.00181422	0.00142632	0.00130288	0.00185843	0.00326413	0.00435944	0.000885455	0.00112061
1335-07	0.00141372	0.00147334	0.00182247	0.00133707	0.0012546	0.00169071	0.00312052	0.0037212	0.000979237	0.0011342
1335-08	0.00139065	0.00145264	0.00180358	0.00129112	0.00122796	0.0015733	0.00295967	0.0032235	0.00110068	0.00122053
1335-09	0.00138853	0.00145528	0.00178896	0.00130505	0.00126292	0.0016297	0.00290546	0.00311427	0.000978111	0.00128639
1335-10	0.00139353	0.00144815	0.00177768	0.00140881	0.00136955	0.00177574	0.00292572	0.00318193	0.000816506	0.000931373
1335-11	0.00138704	0.00143595	0.00177387	0.00152917	0.00151145	0.00198721	0.00299282	0.00341267	0.000798749	0.000862691
1335-12	0.00140379	0.00141399	0.00178862	0.00168519	0.00162712	0.00221237	0.00303068	0.00373045	0.000751689	0.000585661
1336-01	0.00140599	0.00141808	0.00181162	0.00180041	0.0017452	0.00237166	0.00304152	0.00404285	0.00393367	0.000806589
1336-02	0.00139302	0.00138339	0.00175914	0.00182264	0.00172062	0.00227008	0.00309292	0.00426454	0.00633075	0.000899154
1336-03	0.00134267	0.00130919	0.00171125	0.00168929	0.00160004	0.00211682	0.00315581	0.00438716	0.00634544	0.00102573
1336-04	0.00133116	0.00129309	0.00167812	0.00159553	0.00153167	0.00186787	0.00319236	0.00431478	0.00564883	0.00108326
1336-05	0.00131219	0.00126714	0.00163371	0.00141618	0.00133958	0.0016104	0.00334078	0.00439235	0.0051571	0.00139358
1336-06	0.00130947	0.00128373	0.00161857	0.00127216	0.00118919	0.00140154	0.00336535	0.00410135	0.00456145	0.00137264
1336-07	0.00272367	0.00272473	0.00327496	0.00119529	0.00109385	0.00123683	0.0049191	0.00368259	0.0050237	0.00152753
1336-08	0.00728998	0.00745206	0.00849749	0.00121045	0.00105487	0.0011632	0.0104068	0.00350605	0.00492296	0.00178624
1336-09	0.00954957	0.00955033	0.0115581	0.00124825	0.00108228	0.00116622	0.0152826	0.00339236	0.00335318	0.00148087
1336-10	0.0103241	0.00936386	0.0128339	0.00135733	0.00124447	0.00129651	0.0184044	0.00344085	0.0021303	0.000923258
1336-11	0.0115546	0.0109958	0.0133681	0.00157498	0.00130245	0.00155872	0.0199805	0.00374916	0.00159752	0.000707466
1336-12	0.0123273	0.0117229	0.0137356	0.00194462	0.00148736	0.00200532	0.0203259	0.0043562	0.00137373	0.000640058
1337-01	0.0122341	0.0116954	0.0136384	0.0023533	0.00181679	0.00242961	0.019925	0.00532486	0.00126233	0.000779099
1337-02	0.0120587	0.0113169	0.0135308	0.00264677	0.00211227	0.00274792	0.0193792	0.00630333	0.00116346	0.000612806
1337-03	0.0117276	0.0109535	0.0130338	0.00279165	0.00229878	0.00284732	0.0187603	0.0070724	0.00119784	0.000844273
1337-04	0.0112961	0.0106489	0.0124819	0.00291332	0.0022795	0.00286537	0.0182133	0.00756395	0.00121041	0.000997068
1337-05	0.0106297	0.0102992	0.0119888	0.00275186	0.00227384	0.00264457	0.0178547	0.00754568	0.0011513	0.00119607
1337-06	0.0102116	0.00983561	0.0110209	0.00252461	0.00220214	0.00235067	0.0172993	0.00750164	0.000933369	0.00108871
1337-07	0.00944425	0.00896373	0.00976598	0.00235245	0.0020502	0.00210157	0.0161816	0.00665945	0.00107438	0.00132114
1337-08	0.00840732	0.00795756	0.00868043	0.00226546	0.00196709	0.00201766	0.0148103	0.00592322	0.00129838	0.00162799
1337-09	0.00757269	0.00704588	0.00780144	0.00225036	0.00192277	0.00189845	0.013375	0.00554558	0.0010449	0.00124226
1337-10	0.00670187	0.00630216	0.00706115	0.00237271	0.00205619	0.00198209	0.0122121	0.00550482	0.000950881	0.0011176
1337-11	0.00608106	0.00564467	0.00648619	0.00253696	0.00222189	0.00223264	0.0111628	0.00583563	0.000762721	0.000670801
1337-12	0.00564654	0.00536144	0.006069	0.00276495	0.00240388	0.00257289	0.0103713	0.00634256	0.000739913	0.000461316
1338-01	0.0052891	0.00493822	0.00578345	0.00287124	0.00256768	0.00285609	0.00956634	0.00695548	0.000795297	0.000652354
1338-02	0.00483939	0.00456588	0.00538707	0.0028807	0.00255292	0.00286069	0.00889305	0.00740082	0.00088	0.000600797
1338-03	0.00446728	0.00425098	0.0051195	0.00278495	0.00238374	0.00274376	0.00837783	0.00762215	0.00104922	0.000911841
1338-04	0.00421882	0.00401913	0.00495779	0.00263559	0.0022147	0.00257489	0.0080638	0.00780944	0.00101301	0.000944521
1338-05	0.00410517	0.00381037	0.00480353	0.00237299	0.00201211	0.0023005	0.00833284	0.00901224	0.000948219	0.00104977
1338-06	0.00393083	0.00366967	0.00456818	0.00206779	0.00177021	0.0020825	0.00789445	0.00754558	0.000962679	0.00123977
1338-07	0.00365142	0.00350459	0.00424918	0.00181354	0.00162045	0.00184522	0.0075158	0.00663487	0.00111895	0.00154053
1338-08	0.00344518	0.00331921	0.00402007	0.00170982	0.00156265	0.00175684	0.0069241	0.00572151	0.00117895	0.00154794
1338-09	0.00317299	0.00315361	0.00382231	0.00170883	0.00158734	0.00179866	0.00647076	0.00533511	0.00101433	0.00114558
1338-10	0.00303773	0.0029634	0.00358445	0.00187991	0.00174465	0.00197858	0.00614804	0.00528435	0.000924667	0.000949289
1338-11	0.00294078	0.00281785	0.00338648	0.00218126	0.00196489	0.00222726	0.0059552	0.00551765	0.00068923	0.000576352
1338-12	0.00284172	0.0027809	0.00329083	0.00242279	0.00219575	0.00259768	0.00573747	0.00566136	0.000766911	0.00052302
1339-01	0.00276743	0.00272367	0.00316598	0.00255815	0.00233989	0.00276074	0.00548797	0.00569868	0.000763494	0.000522054
1339-02	0.00265206	0.00260935	0.00301279	0.00249255	0.00233745	0.00265402	0.00534373	0.00573419	0.000967097	0.000745103
1339-03	0.00258483	0.00255276	0.00293631	0.00241911	0.00221933	0.00251546	0.00527974	0.00589207	0.00105993	0.000867331
1339-04	0.00258682	0.00248075	0.00289118	0.00237791	0.00209212	0.00234975	0.00517134	0.00560766	0.000987351	0.0008281
1339-05	0.00256444	0.00241729	0.00284039	0.00221329	0.00190747	0.00209636	0.00517503	0.00548177	0.00095574	0.000999829
1339-06	0.00259181	0.00241364	0.00282963	0.00206163	0.00175579	0.00186544	0.00526378	0.00524503	0.000895324	0.00110064
1339-07	0.00262652	0.00238018	0.00278837	0.00201329	0.00166933	0.00163959	0.00505571	0.00470579	0.00103873	0.00130599
1339-08	0.00252886	0.00232302	0.00268685	0.00191881	0.00164759	0.00158659	0.0047958	0.00415164	0.00120446	0.00130201
1339-09	0.00249543	0.0022426	0.00267245	0.00194788	0.00166566	0.00170227	0.00454649	0.00390495	0.000968009	0.00109919
1339-10	0.00249247	0.00218667	0.002624	0.00212916	0.00182053	0.00196592	0.00437442	0.00387386	0.000860776	0.00100288
1339-11	0.00246302	0.00214209	0.00259545	0.00233743	0.00202723	0.00221619	0.00427456	0.00406094	0.000739984	0.000728096
1339-12	0.00245757	0.00211533	0.00259842	0.00263135	0.00224337	0.00251134	0.00427448	0.00453428	0.000715734	0.000544641
1340-01	0.00243304	0.00214942	0.00257121	0.00290918	0.00237618	0.00274772	0.0042019	0.00484228	0.000760245	0.000625833
1340-02	0.00239083	0.00212856	0.00251057	0.00288246	0.00237544	0.00276421	0.00406048	0.00488953	0.000839844	0.000655299
1340-03	0.00230189	0.00209494	0.00243404	0.00270144	0.00225406	0.00265868	0.0039332	0.0049171	0.00110948	0.000999997
1340-04	0.00221933	0.00207567	0.00239445	0.00236172	0.00206131	0.00249556	0.00388197	0.0049293	0.00109705	0.00102304
1340-05	0.0021831	0.00206911	0.00236437	0.00206122	0.0018916	0.00227049	0.00394943	0.00500585	0.000851006	0.000968905
1340-06	0.00215877	0.0020788	0.00235386	0.00180723	0.00173412	0.00203177	0.00389431	0.00450166	0.000827108	0.00102099
1340-07	0.00214685	0.00204839	0.00234594	0.00164596	0.00154359	0.00194143	0.00373947	0.00396686	0.00104078	0.00122164
1340-08	0.00211614	0.00202924	0.00232833	0.00156059	0.00151383	0.00191076	0.00353769	0.00352262	0.00109421	0.00133945
1340-09	0.00209997	0.00202182	0.00228465	0.00157091	0.00152887	0.00193868	0.0034342	0.00343978	0.00112483	0.00124609
1340-10	0.00210147	0.00199036	0.00223877	0.00171797	0.00163134	0.00203314	0.0033858	0.00342812	0.000840907	0.000855592
1340-11	0.00210175	0.0019794	0.0021931	0.00195969	0.00180332	0.00221906	0.00339018	0.00370928	0.000792921	0.000734401
1340-12	0.00209053	0.00195804	0.00221244	0.00218402	0.0020426	0.00251836	0.00341254	0.00403236	0.000727337	0.000478896
1341-01	0.00398952	0.00283109	0.00403522	0.00752751	0.00467127	0.0070838	0.00636851	0.0132933	0.00316608	0.00660568
1341-02	0.013202	0.00745528	0.013512	0.0288998	0.0165714	0.0262164	0.015733	0.0388336	0.00601689	0.0121586
1341-03	0.0189103	0.0127908	0.0198966	0.0432518	0.0307882	0.0417249	0.0238215	0.0604801	0.0073981	0.015494
1341-04	0.0200929	0.0146234	0.022198	0.0464559	0.0348952	0.0475728	0.0295578	0.0753568	0.00787973	0.0168728
1341-05	0.0210954	0.0138898	0.0241267	0.0489648	0.032143	0.0506043	0.0322992	0.08003	0.00745636	0.0164829
1341-06	0.0232963	0.0116995	0.0257366	0.0520934	0.0255596	0.0524929	0.032738	0.0774721	0.0070701	0.0153653
1341-07	0.0225801	0.0106112	0.026351	0.0472499	0.0210399	0.0526428	0.0316864	0.0712668	0.00686514	0.0142562
1341-08	0.0214949	0.0101265	0.0262306	0.0430268	0.0186629	0.0516859	0.0298835	0.0639717	0.00618858	0.0125079
1341-09	0.020661	0.00971342	0.0257857	0.040715	0.0174875	0.0508693	0.0284105	0.0594207	0.00549502	0.0112823
1341-10	0.0199765	0.00945069	0.0253934	0.0394351	0.0171318	0.0515529	0.0271892	0.0574537	0.00467435	0.00931331
1341-11	0.0192785	0.0090494	0.0232535	0.0387582	0.0168001	0.0484309	0.0259377	0.0555699	0.004002	0.00790641
1341-12	0.0187078	0.00859423	0.0221897	0.039332	0.0166519	0.0483291	0.0240385	0.0522343	0.00330299	0.00631816
1342-01	0.0177485	0.0080265	0.0201449	0.0390901	0.0163624	0.0449578	0.0216212	0.0468655	0.0027793	0.00493558
1342-02	0.01559	0.00701981	0.016993	0.0351156	0.0142894	0.0376451	0.0192261	0.0414102	0.00224306	0.00362732
1342-03	0.0124509	0.00594256	0.0139225	0.0271058	0.0117442	0.0298528	0.017	0.0359387	0.00195576	0.00290419
1342-04	0.0101766	0.00509318	0.0115299	0.0206874	0.00962528	0.0237043	0.014996	0.0307756	0.00172327	0.00239469
1342-05	0.00882222	0.00460046	0.00978345	0.0168119	0.00820933	0.018839	0.0133433	0.0257417	0.00143766	0.00210261
1342-06	0.00805774	0.00418853	0.00870409	0.0141648	0.00681568	0.0151717	0.0122311	0.0215179	0.00128714	0.00179208
1342-07	0.0073762	0.00395743	0.00788875	0.0119073	0.00601329	0.0121768	0.0110151	0.0173271	0.00124767	0.00158117
1342-08	0.00697238	0.00376207	0.00749687	0.0107855	0.00549348	0.0108619	0.0098962	0.0142537	0.00132643	0.00166757
1342-09	0.00670329	0.0036717	0.00745271	0.0102712	0.00530587	0.0106832	0.00920003	0.0129074	0.00128417	0.00149769
1342-10	0.00638272	0.00353849	0.00746043	0.0100298	0.00522883	0.011204	0.00875442	0.0124557	0.00103108	0.00106693
1342-11	0.0062352	0.00346863	0.00747627	0.0102668	0.00531847	0.0118944	0.00837114	0.0123477	0.000820428	0.000753722
1342-12	0.00611156	0.00350911	0.00723517	0.0105174	0.00567283	0.0121954	0.00799456	0.0124675	0.000800206	0.000734538
1343-01	0.00587621	0.0034916	0.00663778	0.0103686	0.00581454	0.011535	0.00757068	0.0124848	0.000784083	0.000640239
1343-02	0.00525017	0.00334197	0.00575957	0.00902594	0.0054922	0.0101982	0.00702877	0.0119508	0.000924849	0.000742434
1343-03	0.00471348	0.00306169	0.00504402	0.00773335	0.00482207	0.00869286	0.00656181	0.011187	0.00102071	0.000810316
1343-04	0.00430641	0.0028671	0.00445849	0.00663056	0.00419101	0.00720608	0.00624241	0.0103489	0.00103897	0.000945261
1343-05	0.00392991	0.00265125	0.00402337	0.00554607	0.00351251	0.00602615	0.00607992	0.00963823	0.000821327	0.000975433
1343-06	0.00360156	0.0025048	0.00368508	0.00452633	0.00298276	0.00490812	0.0060047	0.0089482	0.000923972	0.00111043
1343-07	0.00339409	0.00243394	0.00353618	0.00381828	0.00263738	0.0042215	0.00550116	0.00721228	0.00103795	0.00133669
1343-08	0.00327674	0.0023541	0.00347017	0.00349549	0.00245087	0.00393931	0.00518882	0.00627992	0.00108365	0.00138041
1343-09	0.00324856	0.00229728	0.00344658	0.00345804	0.00241068	0.00394962	0.00496047	0.0059155	0.0011511	0.0013786
1343-10	0.00321744	0.00228839	0.00343304	0.00357327	0.00248822	0.00415563	0.00481669	0.00583989	0.000845516	0.000981523
1343-11	0.00322231	0.00224135	0.00347729	0.00389345	0.00265087	0.00452415	0.00475715	0.00586374	0.000707335	0.000619777
1343-12	0.00317587	0.0022287	0.00340653	0.00412024	0.00289238	0.00477119	0.00472556	0.00622465	0.000785881	0.000711377
1344-01	0.00312915	0.00218791	0.00332859	0.00435208	0.00314089	0.00493215	0.00458326	0.00618934	0.000808682	0.000524787
1344-02	0.00291031	0.00204563	0.0031166	0.00404925	0.0029072	0.00458318	0.00444932	0.0061193	0.000937622	0.000616256
1344-03	0.00266615	0.00193337	0.00292445	0.0035685	0.00268725	0.00421997	0.00441634	0.00621286	0.00101994	0.00086223
1344-04	0.00251232	0.00184808	0.0027515	0.0032115	0.00242031	0.00370986	0.0043667	0.00595238	0.00110247	0.000967077
1344-05	0.00239865	0.00182381	0.00256673	0.00284019	0.0022073	0.00314374	0.00437224	0.00573562	0.000945708	0.00108761
1344-06	0.00233041	0.00182249	0.00246349	0.00246396	0.00200145	0.00275304	0.00428164	0.00513893	0.00101287	0.00124003
1344-07	0.00226245	0.00183661	0.00237962	0.00220591	0.0018471	0.00242797	0.00409361	0.00440671	0.001001	0.0011571
1344-08	0.00223829	0.00185293	0.00232144	0.00207661	0.00182416	0.00229929	0.00391008	0.00397964	0.00104464	0.0011534
1344-09	0.00225016	0.00190087	0.00232284	0.00210783	0.00190388	0.00234611	0.00380446	0.00394451	0.0011009	0.00134169
1344-10	0.00225469	0.00192798	0.00233364	0.00224347	0.00211113	0.00247057	0.00373611	0.00401229	0.000811964	0.000805971
1344-11	0.00229448	0.00190096	0.00232238	0.00250702	0.00231953	0.00269147	0.00372523	0.00416673	0.000684272	0.000606108
1344-12	0.00233252	0.00191994	0.00234207	0.00282552	0.00250598	0.00301175	0.00365242	0.00432709	0.000694832	0.000422045
1345-01	0.049786	0.0485113	0.0402731	0.0208895	0.0250907	0.0131718	0.0319452	0.0126595	0.0608168	0.0103794
1345-02	0.252429	0.241737	0.228604	0.134517	0.177542	0.10461	0.15268	0.111793	0.135131	0.0523467
1345-03	0.3554	0.349757	0.333922	0.256148	0.343734	0.195977	0.247135	0.254706	0.168081	0.107286
1345-04	0.370605	0.377266	0.359849	0.314343	0.417489	0.237325	0.295175	0.347597	0.182308	0.142707
1345-05	0.361387	0.365331	0.344598	0.318151	0.41527	0.229664	0.313124	0.375082	0.18622	0.156518
1345-06	0.337135	0.3442	0.330148	0.292248	0.392937	0.213534	0.318503	0.363762	0.185597	0.151299
1345-07	0.315513	0.324698	0.31493	0.25561	0.366725	0.208742	0.317857	0.339621	0.1835	0.1401
1345-08	0.295218	0.302561	0.28309	0.234003	0.337868	0.192742	0.314642	0.325335	0.180081	0.131978
1345-09	0.276044	0.284723	0.252823	0.224239	0.329466	0.184765	0.310315	0.325477	0.17544	0.134175
1345-10	0.255187	0.264983	0.224867	0.227733	0.323995	0.184255	0.306751	0.339643	0.171218	0.146103
1345-11	0.230028	0.247784	0.198107	0.22406	0.322768	0.178181	0.303758	0.35718	0.168429	0.160488
1345-12	0.197526	0.22346	0.175356	0.204072	0.315954	0.171064	0.29727	0.385972	0.165516	0.172999
1346-01	0.169297	0.194566	0.147064	0.178356	0.283905	0.14248	0.285908	0.40203	0.162411	0.18242
1346-02	0.144769	0.161183	0.121355	0.155063	0.225186	0.110307	0.270794	0.394478	0.158785	0.188944
1346-03	0.12433	0.133395	0.103747	0.127111	0.17152	0.0870771	0.253295	0.375099	0.154076	0.18928
1346-04	0.108421	0.113049	0.090465	0.1043	0.134114	0.0715381	0.236652	0.345641	0.148487	0.184756
1346-05	0.0930196	0.0975166	0.0795366	0.0848214	0.107288	0.0604755	0.22171	0.304383	0.14163	0.171204
1346-06	0.0794842	0.084419	0.0708364	0.0661665	0.0854238	0.0521423	0.206313	0.257333	0.137553	0.153571
1346-07	0.0675911	0.0718681	0.0624528	0.0542006	0.06916	0.0439471	0.190632	0.214878	0.140997	0.138647
1346-08	0.0588118	0.0617065	0.0555686	0.0465959	0.0586366	0.0385357	0.177323	0.185143	0.131118	0.12166
1346-09	0.0518826	0.0536801	0.0500706	0.0437238	0.0534344	0.0356262	0.166583	0.170303	0.112679	0.111522
1346-10	0.0461563	0.0485965	0.0463302	0.0426649	0.0523305	0.0359822	0.157633	0.167024	0.0990358	0.10735
1346-11	0.0424377	0.0442883	0.0433748	0.0446178	0.0521548	0.0380949	0.150018	0.172858	0.0910304	0.104639
1346-12	0.0391361	0.0399518	0.0402328	0.0472093	0.0510583	0.0386096	0.141286	0.175818	0.0834088	0.103577
1347-01	0.0357669	0.0359763	0.0368075	0.0477486	0.0480431	0.0376662	0.130822	0.175612	0.0763	0.0993997
1347-02	0.0326242	0.0322239	0.0333289	0.0441594	0.0433109	0.0335483	0.119643	0.16988	0.0690967	0.0923668
1347-03	0.0297505	0.0293148	0.0302832	0.0399074	0.0380845	0.0292144	0.109766	0.157342	0.0617778	0.0807134
1347-04	0.0276284	0.026848	0.0283195	0.0356831	0.0334827	0.0264013	0.101245	0.143048	0.054153	0.0676528
1347-05	0.0258256	0.0245052	0.0264515	0.0317744	0.0288976	0.0231681	0.0940695	0.12587	0.0476962	0.0563225
1347-06	0.0237719	0.0225341	0.0246938	0.0277539	0.0248669	0.0205589	0.0879952	0.106686	0.0429896	0.0461777
1347-07	0.0221126	0.0207965	0.0230499	0.0238511	0.0214137	0.0182156	0.0814409	0.0898376	0.0403092	0.0380539
1347-08	0.0209806	0.0189544	0.0214833	0.0219765	0.0185824	0.0166327	0.0754331	0.0798796	0.036497	0.0319666
1347-09	0.0195882	0.0176374	0.0201632	0.0208582	0.0178816	0.0162497	0.0703465	0.0747162	0.0317043	0.0282187
1347-10	0.018821	0.016777	0.0191077	0.021378	0.0180777	0.0169091	0.0655366	0.0731693	0.0263019	0.0262043
1347-11	0.017511	0.0157403	0.0182112	0.0220356	0.0189311	0.0179788	0.0612125	0.0734028	0.0234587	0.0252674
1347-12	0.016212	0.0147677	0.0172142	0.0221669	0.0194736	0.018715	0.0565355	0.0713617	0.0211055	0.0241286
1348-01	0.0149563	0.013521	0.0160207	0.0215211	0.0185337	0.0188504	0.0514725	0.0669316	0.0186711	0.0217322
1348-02	0.013591	0.0122478	0.014569	0.0194178	0.0166365	0.0174859	0.0467069	0.0618152	0.0166195	0.0193764
1348-03	0.0122146	0.0109175	0.0133413	0.0164837	0.0142263	0.0153304	0.0422441	0.0554082	0.0143904	0.0162657
1348-04	0.0107519	0.0101416	0.0125713	0.0133407	0.0125882	0.0139603	0.0385361	0.048393	0.0124366	0.0136407
1348-05	0.00975742	0.00942699	0.0114058	0.0111076	0.0110734	0.011967	0.0355648	0.0419821	0.0107751	0.0113322
1348-06	0.00880125	0.00886078	0.0104718	0.00922876	0.00971417	0.0101207	0.0327475	0.0350087	0.00955055	0.00979032
1348-07	0.00799502	0.00828762	0.00966901	0.00768369	0.00836322	0.00887267	0.0297922	0.0287275	0.008749	0.00814832
1348-08	0.00729337	0.00766219	0.00899563	0.00678049	0.00750296	0.0081894	0.0270762	0.0247484	0.00800754	0.00701892
1348-09	0.00686992	0.00726496	0.00845075	0.00659087	0.00722161	0.00788737	0.0246176	0.0221853	0.0068223	0.00639928
1348-10	0.00643262	0.00701001	0.00795766	0.0066279	0.00738193	0.00808185	0.0225021	0.0213519	0.0057085	0.00558048
1348-11	0.00607798	0.00680555	0.00754399	0.00687072	0.00769753	0.00844423	0.0205628	0.0210983	0.00472273	0.00471987
1348-12	0.00571786	0.00658689	0.00714412	0.00697209	0.00808891	0.00869516	0.0185593	0.0201943	0.00409345	0.00411939
1349-01	0.00542499	0.00626423	0.00662357	0.00694272	0.00809444	0.00843692	0.0166889	0.0194299	0.00368853	0.00372379
1349-02	0.00492794	0.00579382	0.00589002	0.00603718	0.00763474	0.00745775	0.015073	0.0182167	0.00313165	0.00298576
1349-03	0.0043953	0.00535012	0.00525132	0.00521553	0.00679362	0.00636588	0.0137065	0.0166555	0.00303151	0.00277256
1349-04	0.00397359	0.00497481	0.00479503	0.00444696	0.00605578	0.00544839	0.0126731	0.0153508	0.00261859	0.00253212
1349-05	0.00363512	0.00466066	0.004391	0.00378328	0.00522121	0.00460294	0.0118048	0.0137054	0.00222856	0.00217477
1349-06	0.00343653	0.00442006	0.00410325	0.00321743	0.00447484	0.00403381	0.0111192	0.0121845	0.00195489	0.00202074
1349-07	0.00324107	0.00423601	0.0037078	0.00283822	0.00396531	0.00330242	0.010234	0.00994507	0.0018147	0.00194853
1349-08	0.00302281	0.00402244	0.00337079	0.00257389	0.00360393	0.00293044	0.00938172	0.00864323	0.00187998	0.00211335
1349-09	0.0028834	0.00394711	0.00313275	0.0025366	0.00360902	0.00279255	0.00876198	0.00823248	0.00167712	0.00195566
1349-10	0.00277236	0.00386094	0.00295445	0.00261071	0.00380516	0.00290369	0.00823279	0.00814492	0.0014432	0.00157402
1349-11	0.00276042	0.00379112	0.00286883	0.00284606	0.00415321	0.00316568	0.00778439	0.00829022	0.00103079	0.00079829
1349-12	0.00264384	0.00368703	0.00278534	0.00302505	0.00456565	0.00341974	0.0074281	0.00887901	0.000922666	0.00067538
1350-01	0.00250073	0.00354775	0.00259838	0.00306077	0.00471697	0.00340829	0.00706118	0.00920291	0.00102371	0.000797456
1350-02	0.0023144	0.00330326	0.0023645	0.00286311	0.00439687	0.00317756	0.00666177	0.00928503	0.00106409	0.000935866
1350-03	0.00220944	0.003052	0.00220024	0.00270149	0.00392669	0.00293025	0.00642326	0.00933054	0.00097812	0.00107259
1350-04	0.00206682	0.0028076	0.0020434	0.00239913	0.00336138	0.00258	0.00611418	0.00874715	0.00101015	0.000903319
1350-05	0.00191534	0.00262409	0.00185023	0.00204402	0.00283128	0.00217486	0.00599171	0.00822878	0.0010029	0.00119449
1350-06	0.00184783	0.0025546	0.00167656	0.00180026	0.00251569	0.00181824	0.00574395	0.00703638	0.00106251	0.00142086
1350-07	0.00180158	0.00249173	0.00158285	0.00161292	0.00228156	0.00160473	0.00554399	0.00629866	0.00105463	0.00131249
1350-08	0.00173056	0.00236973	0.00150587	0.00149736	0.00216044	0.00147636	0.00518912	0.00554077	0.00108406	0.00132889
1350-09	0.00164807	0.00227841	0.00144423	0.0014829	0.00213011	0.00141307	0.00493532	0.00509705	0.00100458	0.00127756
1350-10	0.00159078	0.0021911	0.00142304	0.00158235	0.00219731	0.00148922	0.00475678	0.00505347	0.000871695	0.000831224
1350-11	0.00156033	0.00211786	0.00139192	0.0017402	0.0023814	0.001597	0.00471413	0.00523838	0.000805572	0.000788903
1350-12	0.00150587	0.00204576	0.00137432	0.00187517	0.002532	0.00173958	0.00460745	0.00533163	0.000751363	0.000535348
1351-01	0.0014675	0.00191927	0.00136461	0.00199968	0.00254989	0.00184103	0.00448221	0.00540643	0.000775818	0.000504319
1351-02	0.0013541	0.00177691	0.00127558	0.00183876	0.00234113	0.00171099	0.00432952	0.00534239	0.000876268	0.000655799
1351-03	0.00128908	0.00162917	0.00119421	0.00169115	0.00208296	0.00156326	0.00425665	0.00528165	0.000955311	0.000938689
1351-04	0.00124132	0.00151542	0.00118976	0.00149944	0.00176935	0.00147546	0.00454573	0.00608109	0.000975035	0.00100845
1351-05	0.00121165	0.0013714	0.0011098	0.00136437	0.00143411	0.00123818	0.00430884	0.00513992	0.000916561	0.00107233
1351-06	0.00114153	0.00128212	0.00107641	0.00112641	0.00119079	0.00109692	0.00423127	0.00455829	0.000956585	0.00120171
1351-07	0.00110892	0.00120977	0.00107082	0.00101363	0.00100025	0.00102195	0.00406402	0.00406403	0.0010794	0.00126814
1351-08	0.00107692	0.00117522	0.00105668	0.000958687	0.000938629	0.000981758	0.00389442	0.00374904	0.00118742	0.00143923
1351-09	0.00103695	0.00115713	0.00104642	0.000954895	0.000977207	0.00100221	0.00377963	0.00364175	0.00114019	0.00140635
1351-10	0.00101183	0.00116384	0.00102384	0.0010169	0.00106102	0.00105675	0.00367354	0.00363308	0.000892273	0.000907424
1351-11	0.000996141	0.00112464	0.000982874	0.00112048	0.00115891	0.00114525	0.00368865	0.00389185	0.000714676	0.000628056
1351-12	0.000995142	0.00108626	0.000957296	0.00121761	0.00125305	0.00127541	0.00364317	0.00418463	0.000719104	0.000584702
1352-01	0.000993911	0.00105152	0.000905539	0.00131272	0.00131084	0.00130519	0.00361497	0.00451943	0.000798049	0.00068287
1352-02	0.000938254	0.000981345	0.000873438	0.00122895	0.00122173	0.00122228	0.00355309	0.00462026	0.000854859	0.000672757
1352-03	0.000911766	0.000948171	0.000831754	0.00114429	0.0011488	0.00108627	0.00354524	0.00466489	0.000925227	0.000679055
1352-04	0.000870308	0.000932653	0.000814601	0.00103133	0.00106968	0.00102648	0.00358548	0.00476175	0.00101988	0.000868627
1352-05	0.000847146	0.000925341	0.000776966	0.000909916	0.000967353	0.000886512	0.0036263	0.00467889	0.000948572	0.00104093
1352-06	0.000851937	0.000928485	0.00077848	0.0008285	0.000862406	0.000808443	0.00362977	0.00438449	0.00100655	0.00137415
1352-07	0.000824459	0.000919849	0.000783076	0.000741109	0.000785112	0.000763278	0.00353167	0.00395498	0.00105569	0.00133686
1352-08	0.000785992	0.000897404	0.000767432	0.000699758	0.000737386	0.000752815	0.00337647	0.00363447	0.00133718	0.00199095
1352-09	0.000780203	0.000888217	0.000743637	0.000722299	0.00074516	0.000734389	0.00329515	0.00359588	0.00113674	0.0014659
1352-10	0.000775541	0.00090575	0.00073441	0.00077901	0.000869394	0.000798173	0.00318604	0.00352976	0.000889951	0.000854648
1352-11	0.000776911	0.000913811	0.000742835	0.000869888	0.000978654	0.000900609	0.00315452	0.00364712	0.000731127	0.000740731
1352-12	0.000804127	0.000918148	0.000773469	0.00100049	0.00108475	0.00101695	0.00313995	0.00391017	0.000684793	0.000472366
1353-01	0.000861578	0.000921051	0.000828429	0.00109173	0.00118173	0.00113078	0.00314029	0.00423505	0.000828039	0.000498025
1353-02	0.000888915	0.000898027	0.000819453	0.00114375	0.00114034	0.00109627	0.00313511	0.0043771	0.000913955	0.000684546
1353-03	0.000865695	0.000875842	0.000790313	0.001101	0.00109606	0.00106475	0.00301226	0.00427691	0.00100486	0.000828399
1353-04	0.00085445	0.0008552	0.000757468	0.001035	0.00101418	0.00100302	0.00305886	0.0044484	0.000960851	0.00085273
1353-05	0.000866755	0.000852723	0.000746782	0.000968161	0.000909658	0.000911791	0.0031722	0.00452854	0.00100476	0.00110483
1353-06	0.000876359	0.000867283	0.000763331	0.000856196	0.000796978	0.000824048	0.00318694	0.00417566	0.000911533	0.00113269
1353-07	0.000879347	0.000860192	0.000800306	0.000775349	0.000670351	0.000794199	0.00308606	0.00360394	0.00102874	0.00140801
1353-08	0.000885876	0.000852472	0.000828836	0.000783317	0.000634992	0.000805782	0.00291633	0.00317325	0.000988825	0.00112299
1353-09	0.000894165	0.000872351	0.000863356	0.000840712	0.000669116	0.000853317	0.00286989	0.00313678	0.00110933	0.00133346
1353-10	0.00090304	0.000899407	0.000887269	0.000940439	0.0007859	0.000932621	0.00284207	0.00313237	0.000877444	0.000926348
1353-11	0.000925588	0.000929255	0.000909529	0.00107081	0.000925142	0.00105442	0.00288333	0.00325002	0.000730447	0.000625898
1353-12	0.000935347	0.00095942	0.000936853	0.00115678	0.00107049	0.00116005	0.00290213	0.00346216	0.000665845	0.00045631
1354-01	0.000944965	0.00100493	0.000927645	0.00125867	0.00123872	0.00123138	0.00287338	0.00365737	0.000780578	0.000608669
1354-02	0.000949672	0.00102201	0.000905404	0.00126989	0.00131427	0.00126057	0.0029067	0.00385098	0.000889101	0.000691222
1354-03	0.000951841	0.00101121	0.000898587	0.00123722	0.00130064	0.00125993	0.00291115	0.00388091	0.00105875	0.000817754
1354-04	0.00094353	0.000983887	0.000914117	0.00112418	0.00122027	0.00119417	0.00303715	0.004044	0.00105462	0.000994185
1354-05	0.000954629	0.000969427	0.000927928	0.0010056	0.00108861	0.00103692	0.0031645	0.00412709	0.000895587	0.00100645
1354-06	0.00100408	0.000947736	0.000982879	0.000922538	0.000952649	0.000928411	0.00323618	0.00395963	0.000931662	0.00135033
1354-07	0.00103566	0.000952576	0.00101308	0.000871027	0.000892802	0.000854661	0.00311105	0.00351104	0.000944456	0.00117443
1354-08	0.00104986	0.000974943	0.00103319	0.000855187	0.000878521	0.000827481	0.00302484	0.00333676	0.00128065	0.0018816
1354-09	0.00108465	0.00100025	0.00106848	0.00095245	0.000891896	0.000900693	0.00295006	0.00324098	0.00106661	0.00130535
1354-10	0.00109523	0.000997056	0.00109609	0.00109948	0.000981145	0.00104129	0.00298313	0.00328904	0.00085873	0.000844366
1354-11	0.00110492	0.00101653	0.00110082	0.00125203	0.00117118	0.00115113	0.00303848	0.003469	0.00078954	0.000878311
1354-12	0.0011459	0.00104807	0.00110136	0.00141503	0.00137421	0.00130133	0.00310662	0.00385048	0.00071606	0.000501925
1355-01	0.00119575	0.00106418	0.00112494	0.0015542	0.00145064	0.00145119	0.00308494	0.00415342	0.000786234	0.00057205
1355-02	0.00119707	0.00107769	0.00111523	0.00157071	0.00147653	0.00148982	0.0031117	0.00444417	0.00090258	0.000563979
1355-03	0.001177	0.00105021	0.00107986	0.00151067	0.00138917	0.00143507	0.00302983	0.00426473	0.00104679	0.000835786
1355-04	0.00116788	0.00104399	0.00108315	0.00142985	0.00132985	0.00138028	0.00317371	0.0044817	0.000964674	0.000861257
1355-05	0.00117564	0.00103881	0.00106652	0.00130582	0.00119777	0.00119919	0.00323754	0.0045216	0.0010006	0.000956218
1355-06	0.00119308	0.00106644	0.00106945	0.0011872	0.00106096	0.00104667	0.00329876	0.00433688	0.000963259	0.0012809
1355-07	0.00121644	0.00109446	0.00108691	0.00113283	0.000977373	0.000996058	0.0031531	0.00382688	0.00105036	0.00135896
1355-08	0.0012088	0.00110766	0.00108157	0.00109886	0.000989519	0.00096588	0.00300051	0.00336325	0.0010673	0.00121758
1355-09	0.0011991	0.00114054	0.00108894	0.00111552	0.00109124	0.000972879	0.00291248	0.00322867	0.00119606	0.00150665
1355-10	0.00121226	0.00117205	0.00109766	0.00122289	0.001255	0.00106861	0.00285769	0.00319783	0.00096725	0.00097264
1355-11	0.00124122	0.00118527	0.00112932	0.00142093	0.00138502	0.00124815	0.00286736	0.00333271	0.000716984	0.00063647
1355-12	0.00128028	0.00122814	0.00115284	0.00162897	0.00155144	0.00144093	0.00284338	0.00347675	0.000725518	0.000573449
1356-01	0.00130532	0.00122506	0.00115084	0.00175692	0.00162948	0.00151551	0.00283254	0.00371119	0.000832158	0.000591799
1356-02	0.00126637	0.00123207	0.0011524	0.00173307	0.00167783	0.0015215	0.00282835	0.00389578	0.000958888	0.000645617
1356-03	0.00122797	0.00118656	0.00113268	0.00171823	0.00157836	0.00146331	0.0027646	0.00384709	0.00103402	0.000819136
1356-04	0.00118675	0.00116101	0.001122	0.00158707	0.00145761	0.0013933	0.00289454	0.00416668	0.000963122	0.000842695
1356-05	0.00117046	0.00115693	0.00113708	0.0013889	0.00129515	0.00132573	0.00298394	0.00414134	0.000948044	0.00114457
1356-06	0.00119504	0.00117659	0.00116604	0.00123188	0.00114705	0.00123282	0.00311125	0.00416592	0.000925617	0.00127567
1356-07	0.00121575	0.00117501	0.00117238	0.00114182	0.00101173	0.00116464	0.00297088	0.00358128	0.00106824	0.00147251
1356-08	0.00119827	0.00118795	0.00118126	0.00109785	0.000970929	0.0011917	0.00281468	0.00311011	0.000949205	0.0011
1356-09	0.00121262	0.00125222	0.00119925	0.00115687	0.00102731	0.00124408	0.00274043	0.0029068	0.000996486	0.00109268
1356-10	0.00122317	0.00129518	0.00120331	0.00124919	0.00119113	0.00132253	0.00273509	0.00289055	0.00083083	0.000892317
1356-11	0.00123829	0.00133519	0.00122377	0.00137592	0.00142806	0.00144223	0.00279	0.00307149	0.000752498	0.000668432
1356-12	0.00127474	0.00136429	0.00123091	0.00153069	0.00163315	0.00160028	0.00286681	0.00343495	0.000710204	0.000581414
1357-01	0.00128865	0.00136954	0.00124947	0.00161015	0.00174606	0.00172097	0.00285622	0.00367432	0.000834685	0.000670444
1357-02	0.0012721	0.0013795	0.00122235	0.00160974	0.00177705	0.00168222	0.00285307	0.00377329	0.000856664	0.000636016
1357-03	0.00124756	0.00137214	0.00118543	0.00158403	0.00173517	0.0015732	0.00289163	0.00391153	0.00106311	0.000951364
1357-04	0.00120052	0.00132497	0.00117671	0.00141383	0.00158054	0.00147046	0.00300984	0.00401845	0.00103391	0.00112978
1357-05	0.00118586	0.00128232	0.00115324	0.0012367	0.00139869	0.00127805	0.00314576	0.00405634	0.000919337	0.00106746
1357-06	0.00121173	0.0012743	0.00117386	0.00107879	0.00122401	0.00112066	0.00320076	0.00378474	0.000981528	0.00117658
1357-07	0.00123974	0.00125188	0.00120529	0.00100047	0.00110325	0.00103001	0.0031046	0.00339853	0.00104484	0.00109244
1357-08	0.00127322	0.00125931	0.00123378	0.000962867	0.00106423	0.00100643	0.00304396	0.00323956	0.00114238	0.00133067
1357-09	0.00130632	0.00125928	0.00126071	0.000972606	0.00109075	0.00104762	0.0029732	0.00310842	0.000974355	0.00105192
1357-10	0.00132301	0.00130016	0.0013122	0.00110748	0.00123841	0.00120596	0.00296019	0.00311728	0.000895089	0.0010221
1357-11	0.00136019	0.00133786	0.00133894	0.00132304	0.00141129	0.00138926	0.00301901	0.00329925	0.000746922	0.000621174
1357-12	0.00139495	0.00136109	0.00136022	0.00153995	0.00157707	0.00159572	0.0030455	0.00358448	0.000721567	0.000511215
1358-01	0.00143109	0.00134202	0.00139603	0.00173042	0.00170284	0.00175113	0.00303021	0.00378384	0.000790646	0.000515122
1358-02	0.00144514	0.00134933	0.00141969	0.00179954	0.00181068	0.00180433	0.00302031	0.00401405	0.000904053	0.000647339
1358-03	0.001437	0.00136115	0.00141366	0.00179812	0.00187151	0.00176888	0.00305636	0.00413268	0.00088418	0.000595104
1358-04	0.00141905	0.00133246	0.00136578	0.00169773	0.00173918	0.00163206	0.00310066	0.00413094	0.000994546	0.000904078
1358-05	0.0013951	0.00129828	0.00133158	0.00155379	0.00152884	0.00143457	0.00322003	0.00433006	0.00105622	0.00125666
1358-06	0.00138604	0.00131582	0.00133937	0.00138177	0.00138944	0.00127765	0.00328909	0.00421986	0.000983405	0.00136149
1358-07	0.00139132	0.00133714	0.00134003	0.00130276	0.00130532	0.00115884	0.00315875	0.00365154	0.00106634	0.00134437
1358-08	0.00139605	0.00130957	0.00132977	0.00123904	0.0012289	0.00112734	0.00306361	0.00331342	0.00121801	0.00161124
1358-09	0.00140584	0.00129702	0.00134312	0.00128357	0.0012456	0.00116144	0.0029791	0.00317544	0.00108768	0.00137933
1358-10	0.00141209	0.0013084	0.00134776	0.00138566	0.00133833	0.00126708	0.00292283	0.00324625	0.000946067	0.000977426
1358-11	0.00143809	0.00130833	0.00132419	0.00155585	0.00143914	0.00142779	0.00295284	0.00346649	0.000852534	0.000792473
1358-12	0.00145612	0.00135292	0.00135382	0.00176007	0.00166903	0.00164132	0.0029724	0.00368204	0.000770618	0.000549818
1359-01	0.00144656	0.0013865	0.00137225	0.00186226	0.00188288	0.00179563	0.00291406	0.00379744	0.000888753	0.000603085
1359-02	0.00140298	0.00136587	0.00136028	0.00181535	0.00184712	0.00180734	0.00291669	0.00400947	0.00100561	0.000810028
1359-03	0.00136069	0.00135614	0.00131661	0.00168581	0.00170882	0.0017346	0.00297616	0.00416752	0.00103728	0.000890924
1359-04	0.00132258	0.00136999	0.0012784	0.00154092	0.00155429	0.00160367	0.00311647	0.00444294	0.00103335	0.000835321
1359-05	0.00126955	0.00136126	0.00124524	0.00132685	0.0013609	0.00142946	0.00317217	0.00439405	0.00100425	0.00110417
1359-06	0.00127884	0.00137922	0.00126203	0.00119123	0.00119847	0.00127262	0.00317752	0.00403559	0.0010539	0.00144131
1359-07	0.00130472	0.00141114	0.00126154	0.00114294	0.0011488	0.00113364	0.00308877	0.00363608	0.00103909	0.00145938
1359-08	0.00131255	0.00141801	0.00128319	0.00113644	0.00114478	0.00108945	0.0030003	0.00332497	0.00108158	0.00130085
1359-09	0.00135714	0.0014072	0.00129564	0.00126547	0.00120592	0.00109941	0.00289873	0.00314274	0.00100606	0.00107302
1359-10	0.001326	0.00141115	0.00130465	0.00138098	0.00131815	0.00122419	0.00288089	0.00322287	0.00094388	0.00112534
1359-11	0.00129739	0.0014284	0.00134323	0.0014915	0.0014806	0.00146964	0.00290508	0.00332508	0.000802622	0.000641361
1359-12	0.00128672	0.00145803	0.00138166	0.00162729	0.00166366	0.00171018	0.00294774	0.00358028	0.000701188	0.000518858
1360-01	0.00134507	0.00147171	0.00137925	0.00179171	0.00179133	0.00184315	0.00294239	0.00385868	0.000804604	0.00055629
1360-02	0.00133534	0.00146296	0.00136487	0.00177151	0.00183983	0.00188442	0.00288559	0.00387017	0.000877602	0.000523956
1360-03	0.00133168	0.00142825	0.00131278	0.00171891	0.0017609	0.00172924	0.00286436	0.0039306	0.000975373	0.000859491
1360-04	0.00132767	0.00141514	0.00129689	0.00163109	0.00163105	0.00155479	0.00297505	0.00418424	0.00110599	0.0010541
1360-05	0.00129657	0.00140546	0.00131059	0.00142321	0.0014229	0.00136421	0.00316014	0.00448874	0.0010429	0.00119241
1360-06	0.00129473	0.00142826	0.00133195	0.00124188	0.00126196	0.00117125	0.00309292	0.00393203	0.000900859	0.00121852
1360-07	0.00129015	0.00142012	0.00135953	0.00112019	0.00115975	0.00110007	0.0029895	0.00344929	0.00111363	0.00140619
1360-08	0.0013099	0.00139705	0.00138395	0.00112054	0.00112239	0.0010979	0.00282301	0.0030364	0.0010741	0.00134738
1360-09	0.00130038	0.00139403	0.0013924	0.00112522	0.00112101	0.00114289	0.0027384	0.00288642	0.00102193	0.00127468
1360-10	0.00129565	0.00140287	0.0014096	0.001237	0.00124391	0.00127835	0.00273149	0.00288796	0.000841357	0.000891264
1360-11	0.00128679	0.00140302	0.00141823	0.00138877	0.00141614	0.0014631	0.00279076	0.00312159	0.000806929	0.000773384
1360-12	0.00129875	0.00144298	0.00139357	0.00155547	0.00166007	0.00160661	0.00287103	0.00347137	0.000757942	0.000606705
1361-01	0.0013066	0.00144626	0.00136892	0.00168781	0.0018004	0.00167809	0.00294075	0.00383315	0.000866785	0.000608602
1361-02	0.00128071	0.00140152	0.00135925	0.00169109	0.00177099	0.00170193	0.00297755	0.00397418	0.000864446	0.000657497
1361-03	0.00127603	0.00136408	0.00133823	0.00159282	0.00169053	0.00169344	0.00289999	0.00386502	0.00112116	0.000936947
1361-04	0.00126937	0.0013277	0.00130981	0.00150251	0.00155312	0.00159413	0.00307139	0.00425894	0.000979907	0.000886623
1361-05	0.00123688	0.00129919	0.00129607	0.00132824	0.00139145	0.00144555	0.0031521	0.00420122	0.000965392	0.000964214
1361-06	0.00126415	0.00131104	0.00130374	0.00121849	0.00124502	0.0012757	0.00322671	0.00405137	0.000996027	0.00131568
1361-07	0.00129797	0.00134103	0.0013082	0.00118273	0.00119057	0.001188	0.00317643	0.00370807	0.00109658	0.00139836
1361-08	0.00129201	0.00135042	0.0013003	0.00115662	0.00118404	0.00113913	0.00301792	0.00332955	0.0011367	0.00134592
1361-09	0.00129532	0.001394	0.0012832	0.00114502	0.00126712	0.00116823	0.00288893	0.00313083	0.00113194	0.0013398
1361-10	0.00127337	0.00145444	0.00126427	0.00123111	0.00141937	0.00125615	0.00288614	0.00321749	0.000908967	0.000993423
1361-11	0.00129954	0.00148919	0.00126665	0.00138394	0.00158646	0.00138044	0.00288659	0.00329667	0.000824335	0.000790876
1361-12	0.00131279	0.00149691	0.00130136	0.00155138	0.00180066	0.00157972	0.00289551	0.00345103	0.000737128	0.000551547
1362-01	0.00129108	0.00145471	0.00134031	0.00167041	0.00188564	0.00178717	0.00289789	0.00365357	0.000876338	0.000712709
1362-02	0.00125396	0.00142783	0.00131017	0.00166369	0.00188772	0.00176174	0.0029243	0.00384337	0.00087515	0.000778446
1362-03	0.00126099	0.00139807	0.00127281	0.00166508	0.00177162	0.00168106	0.00295101	0.00387211	0.00101318	0.000734917
1362-04	0.00123621	0.00137741	0.00123324	0.00154315	0.00163411	0.00156074	0.00305381	0.0040891	0.000955712	0.000842731
1362-05	0.0012033	0.00137817	0.00122079	0.0013606	0.0014011	0.00139506	0.00322472	0.00436054	0.000917482	0.00100039
1362-06	0.00120407	0.00143918	0.00120974	0.00121917	0.00125825	0.00121561	0.00316516	0.00385534	0.00087114	0.00108521
1362-07	0.00120272	0.00147726	0.00121357	0.00108682	0.00118803	0.00112379	0.00302686	0.00326087	0.00103932	0.001244
1362-08	0.00120089	0.00148665	0.00120584	0.00105447	0.00117913	0.00109209	0.00287613	0.00293972	0.00113441	0.00147154
1362-09	0.0012135	0.00149993	0.00124095	0.0010546	0.00124759	0.00115089	0.00277418	0.00275443	0.00119161	0.00165859
1362-10	0.00122866	0.00150913	0.00126129	0.0011591	0.0013991	0.00129589	0.00273851	0.0027707	0.000868376	0.000860004
1362-11	0.00123011	0.00152258	0.00126898	0.00132523	0.0016152	0.00146851	0.00276489	0.00283439	0.000703912	0.000619575
1362-12	0.00125696	0.00153978	0.00125953	0.00145317	0.00182621	0.00161607	0.00281244	0.00309561	0.000711942	0.000474047
1363-01	0.0012655	0.00153966	0.00124566	0.00154144	0.00195778	0.00173271	0.00282396	0.00334914	0.000783766	0.000518191
1363-02	0.00125227	0.00154014	0.00122714	0.00153514	0.00199804	0.00172046	0.0027744	0.00346579	0.000968023	0.000765478
1363-03	0.00123581	0.00147883	0.00121135	0.00151501	0.00188683	0.0016162	0.0028167	0.0036257	0.00101421	0.000694227
1363-04	0.00124454	0.00145446	0.00122877	0.0015049	0.00180313	0.00154444	0.00292159	0.00383021	0.00106683	0.00106126
1363-05	0.00123721	0.00143087	0.00122308	0.00135921	0.00160796	0.00134887	0.00307955	0.0039188	0.000926045	0.000935759
1363-06	0.00125438	0.0014496	0.00126408	0.00121802	0.00146029	0.0012046	0.00313331	0.00371116	0.000931051	0.0011481
1363-07	0.00127751	0.00147216	0.00131411	0.00116262	0.00139449	0.00115899	0.00304395	0.00327025	0.00101585	0.00117021
1363-08	0.00129321	0.00144927	0.00133959	0.00114994	0.00135703	0.00114836	0.00295794	0.00302309	0.00121012	0.00163168
1363-09	0.00128297	0.00144897	0.00135694	0.00114002	0.00136291	0.00119637	0.00288094	0.0029072	0.00099261	0.00123609
1363-10	0.00128217	0.00146556	0.00137379	0.00123152	0.00146778	0.00135548	0.00286747	0.00293845	0.000879997	0.00102216
1363-11	0.00128216	0.00150423	0.00139439	0.00135125	0.00165541	0.00151967	0.0028839	0.00308088	0.000751489	0.000672783
1363-12	0.00131297	0.00148871	0.00140405	0.00150712	0.001803	0.00167931	0.00288943	0.00330435	0.000794303	0.000667351
1364-01	0.00137541	0.00149036	0.00141093	0.00171264	0.0019775	0.00179809	0.00292547	0.00358237	0.000715837	0.000519821
1364-02	0.00137667	0.00147032	0.00139811	0.00175059	0.00196922	0.00178399	0.00290304	0.00369605	0.00081441	0.000633375
1364-03	0.00137582	0.00144815	0.00137445	0.00170528	0.00187725	0.00171925	0.00298112	0.00385912	0.000886285	0.000632223
1364-04	0.00137402	0.00142623	0.00134471	0.00158689	0.00170256	0.00159166	0.00313165	0.00419524	0.00088014	0.000780691
1364-05	0.00133987	0.00139704	0.00131507	0.00133118	0.00150912	0.00137904	0.00322463	0.00416029	0.00092354	0.00105896
1364-06	0.00136896	0.00141275	0.0013154	0.00118935	0.00139609	0.00117694	0.00320683	0.00375834	0.000990369	0.00126883
1364-07	0.00138746	0.00146049	0.00131448	0.00113399	0.00137381	0.00107113	0.00314921	0.00344995	0.00106608	0.00138083
1364-08	0.00140268	0.0014515	0.00132171	0.00114883	0.00134166	0.00106618	0.00304574	0.00320044	0.00112582	0.00140252
1364-09	0.00142831	0.00144829	0.00129994	0.00122436	0.0013705	0.00108374	0.00292013	0.0030854	0.000994982	0.00119305
1364-10	0.00145823	0.00145082	0.00131031	0.00139556	0.00147571	0.001197	0.00290133	0.00304761	0.000842325	0.000875346
1364-11	0.00147323	0.00145871	0.00133753	0.00158193	0.00162894	0.00137129	0.00292006	0.00322453	0.000740063	0.000675555
1364-12	0.0014992	0.00146037	0.00135985	0.00178274	0.00180374	0.00158327	0.00299411	0.00355145	0.000765602	0.000610667
1365-01	0.00150443	0.00143558	0.00136073	0.00195137	0.00191795	0.00171465	0.00300311	0.00374788	0.000781114	0.000534615
1365-02	0.00147171	0.00138529	0.00132841	0.00194036	0.00181871	0.00173246	0.00297628	0.00381654	0.000816082	0.000560088
1365-03	0.00139032	0.00133535	0.00129285	0.00179777	0.00169376	0.00171555	0.00295977	0.00385261	0.000955588	0.000757539
1365-04	0.00133657	0.00131333	0.00123903	0.00163487	0.00154834	0.00154754	0.00307223	0.00399156	0.000975142	0.000816149
1365-05	0.00132988	0.00131531	0.00122105	0.00146499	0.00140053	0.00140087	0.00309615	0.00388892	0.000986876	0.00122625
1365-06	0.00138081	0.00133087	0.0012737	0.00136026	0.00126791	0.0012958	0.00317778	0.00378906	0.00102769	0.00136129
1365-07	0.00139764	0.00135524	0.00131028	0.00130191	0.0011821	0.00124039	0.00305627	0.00337693	0.00103126	0.00133763
1365-08	0.00140412	0.00137373	0.00132109	0.0012893	0.00120544	0.0012219	0.00290802	0.0030711	0.00111061	0.00131882
1365-09	0.00139623	0.00138459	0.00134271	0.00130585	0.00129654	0.00124419	0.00281596	0.00299291	0.00109201	0.00132417
1365-10	0.00140578	0.00138004	0.00135646	0.00140608	0.00142021	0.00134344	0.00275325	0.00296641	0.000888435	0.000919484
1365-11	0.00141635	0.00138874	0.0013388	0.00154976	0.0015749	0.00144037	0.00274793	0.00310585	0.000824252	0.000800277
1365-12	0.00143195	0.00140635	0.00134407	0.00172133	0.00173347	0.00157217	0.00282105	0.00336777	0.000739502	0.000557806
1366-01	0.00144819	0.00143688	0.00138191	0.00189246	0.00188891	0.00172302	0.0028039	0.00360694	0.000854302	0.000617246
1366-02	0.00140116	0.00142341	0.00133033	0.00187077	0.00186426	0.00168796	0.00283804	0.00391113	0.000967914	0.000805702
1366-03	0.00138133	0.00142154	0.0012833	0.00184948	0.00178409	0.00165826	0.002871	0.00404517	0.00109143	0.000978093
1366-04	0.00135612	0.00142415	0.00125444	0.0017564	0.00169671	0.0015282	0.00301797	0.00440038	0.00115401	0.00096323
1366-05	0.00135498	0.00139488	0.00125315	0.00159452	0.00147739	0.00136152	0.00327108	0.00489206	0.00093629	0.00106571
1366-06	0.00135207	0.00141243	0.00127964	0.00139101	0.00131842	0.00120047	0.00321692	0.00430776	0.000848892	0.000964936
1366-07	0.00136265	0.00143182	0.00129729	0.00122442	0.00122146	0.00112578	0.00310673	0.00376445	0.00100223	0.00113686
1366-08	0.00134873	0.00141716	0.00131569	0.00114504	0.00115528	0.00116409	0.00292518	0.00319497	0.00113502	0.0014842
1366-09	0.00136372	0.00143677	0.00133356	0.00114946	0.00119497	0.00121239	0.00281698	0.00297731	0.00111667	0.00137553
1366-10	0.00137344	0.00147171	0.00134777	0.00128635	0.00130201	0.001311	0.00285198	0.00310543	0.000900591	0.000902182
1366-11	0.00141658	0.00147857	0.00137677	0.00152542	0.00144545	0.00148142	0.00289358	0.0032315	0.000711675	0.000487893
1366-12	0.00146276	0.00150258	0.00138746	0.00177619	0.00163507	0.00165302	0.0029345	0.00342827	0.00071102	0.000539693
1367-01	0.00150295	0.00149304	0.0014333	0.0019111	0.0017701	0.00178861	0.00298877	0.00362798	0.000804814	0.000627023
1367-02	0.0015357	0.00147637	0.0014575	0.00198101	0.00182056	0.00177379	0.00299064	0.00367589	0.000886233	0.000653003
1367-03	0.00151488	0.00141901	0.00142528	0.00187132	0.00173916	0.00164461	0.00305681	0.00381337	0.000887229	0.000709647
1367-04	0.00146721	0.00138313	0.00138801	0.0016453	0.00164781	0.00150695	0.00321035	0.00403469	0.000983705	0.00088314
1367-05	0.00143174	0.00133202	0.00135541	0.00143574	0.00147306	0.00132239	0.00325205	0.00384024	0.000967731	0.00107049
1367-06	0.00140943	0.00132686	0.00135092	0.0012287	0.00129349	0.00116522	0.00332552	0.0036421	0.000911547	0.00114519
1367-07	0.00140417	0.0013492	0.00135462	0.00112829	0.00122216	0.00106067	0.00324924	0.00329846	0.00105971	0.00133453
1367-08	0.001384	0.00135304	0.00135926	0.00110553	0.00119271	0.00103475	0.00309461	0.003055	0.00114156	0.00145072
1367-09	0.00138146	0.00135972	0.00137977	0.00109594	0.0011804	0.0010872	0.00303294	0.0029434	0.00105485	0.00130968
1367-10	0.00133915	0.0013417	0.00139413	0.00107232	0.00126852	0.00120318	0.00298581	0.00290445	0.00100031	0.00105592
1367-11	0.0013574	0.00136677	0.001397	0.0011768	0.00143069	0.00135421	0.00301193	0.00299832	0.000795514	0.000710008
1367-12	0.00138694	0.00139947	0.00141363	0.00138582	0.00164271	0.00153341	0.00309057	0.00330644	0.000682337	0.000481282
1368-01	0.00139868	0.00136743	0.00141916	0.00155535	0.00174206	0.0017265	0.0030647	0.00356165	0.000751466	0.000437684
1368-02	0.00137749	0.00128202	0.00138998	0.00159184	0.0016987	0.0017122	0.00309726	0.00378684	0.000913851	0.000785962
1368-03	0.00135077	0.00120602	0.00136753	0.00157112	0.00157441	0.00166898	0.00308737	0.00381581	0.00108045	0.00083624
1368-04	0.00134208	0.00119259	0.00134515	0.00147663	0.00150238	0.00156284	0.00315607	0.00383767	0.000926958	0.000906069
1368-05	0.00134747	0.00118745	0.00133795	0.00135551	0.00133835	0.00140129	0.00328275	0.0039607	0.00101512	0.00114926
1368-06	0.00135469	0.00121116	0.00135492	0.0012406	0.00116475	0.00126281	0.00341973	0.00397025	0.00104324	0.00131461
1368-07	0.00134915	0.0012515	0.00134896	0.00114168	0.00111636	0.00116456	0.00338315	0.00374686	0.00109562	0.00134908
1368-08	0.00132878	0.00130268	0.00134982	0.0010934	0.00113626	0.00115706	0.00323194	0.00347403	0.0012003	0.00147921
1368-09	0.00131138	0.00131945	0.00133139	0.00108965	0.00120895	0.00119165	0.00310113	0.00333562	0.00119712	0.00145035
1368-10	0.00128546	0.00131233	0.00132263	0.00119284	0.00135174	0.00128842	0.00301348	0.00330329	0.000914456	0.000881045
1368-11	0.00127746	0.00133009	0.00134695	0.0013498	0.00152167	0.00145055	0.00305051	0.0035265	0.000745097	0.000595148
1368-12	0.00128846	0.00135362	0.00135682	0.0014947	0.00170475	0.00161166	0.003105	0.00381666	0.000788267	0.000571111
1369-01	0.00128573	0.00134717	0.00139043	0.00162634	0.00182573	0.00179537	0.00310442	0.00403327	0.000828022	0.000554002
1369-02	0.0012673	0.00132132	0.00137469	0.00163377	0.00179676	0.00182895	0.00309111	0.00425438	0.000854261	0.000603999
1369-03	0.00125242	0.00130107	0.00133875	0.00157795	0.00169038	0.0017564	0.00308528	0.00428927	0.000915233	0.000669597
1369-04	0.00122188	0.00131012	0.00132516	0.00149054	0.00157641	0.00163416	0.00311118	0.00435073	0.00105979	0.00096737
1369-05	0.00121296	0.00130059	0.00129805	0.00132071	0.00139362	0.00145989	0.00317777	0.00434618	0.000971158	0.00122508
1369-06	0.00122855	0.00130675	0.00128244	0.00115272	0.00123631	0.00126872	0.00318131	0.00401644	0.00103683	0.00140786
1369-07	0.0012523	0.00132023	0.00127539	0.00109573	0.00113518	0.00114151	0.00299335	0.00332617	0.000974844	0.00117184
1369-08	0.00123898	0.00133367	0.00127074	0.00106911	0.00111808	0.00107964	0.00289032	0.00308054	0.00112557	0.00140005
1369-09	0.00122535	0.00131228	0.00126567	0.00109632	0.0010515	0.00104828	0.00277782	0.00291186	0.00108765	0.00123806
1369-10	0.00124331	0.00131525	0.00127869	0.00121257	0.001136	0.00116616	0.00271142	0.00286595	0.000944208	0.00101334
1369-11	0.00128469	0.00133016	0.00135039	0.00139271	0.00129293	0.00143831	0.0027273	0.00299685	0.000728941	0.00056674
1369-12	0.00130105	0.00135969	0.00138113	0.00160226	0.0014788	0.00169011	0.00281266	0.00332746	0.000715499	0.000482564
1370-01	0.00132831	0.0013722	0.00138057	0.00178668	0.0016477	0.00183312	0.00279178	0.00341269	0.000780118	0.000558921
1370-02	0.00131044	0.00135066	0.00136425	0.00176877	0.00166117	0.00180369	0.00276979	0.00354512	0.000883895	0.000721986
1370-03	0.00130322	0.00133284	0.00135075	0.00170308	0.00160254	0.00174037	0.00280555	0.00366116	0.00105296	0.000981327
1370-04	0.00131075	0.00130609	0.00135605	0.00152776	0.00149978	0.00163486	0.00296604	0.00401252	0.000938312	0.000896646
1370-05	0.0013445	0.00128706	0.00134745	0.00138949	0.00131575	0.00145695	0.00304995	0.00404571	0.00100414	0.0011478
1370-06	0.00138176	0.00129087	0.00137676	0.00126457	0.00117298	0.00132202	0.0030897	0.00384957	0.000964694	0.00129817
1370-07	0.00138801	0.00128541	0.00138122	0.00117747	0.00109405	0.00122019	0.00301	0.00334282	0.00106442	0.00136912
1370-08	0.00136977	0.00129097	0.00136233	0.00111223	0.0010707	0.00113378	0.00285953	0.00301565	0.00112654	0.00133425
1370-09	0.00135259	0.00127798	0.00135118	0.00111874	0.00109485	0.00115483	0.00274984	0.0028384	0.00108638	0.00131682
1370-10	0.00135827	0.00126281	0.00135551	0.00126363	0.00119551	0.00125659	0.00272606	0.0028923	0.00087502	0.000950362
1370-11	0.0013702	0.00129255	0.00134217	0.00141777	0.00137817	0.00141313	0.00278885	0.00310856	0.000774575	0.00069871
1370-12	0.00137659	0.00127184	0.00135325	0.001576	0.00150587	0.00158144	0.0028837	0.00337907	0.00075398	0.000657429
1371-01	0.00140778	0.00124787	0.00137372	0.00172462	0.00159764	0.00172127	0.00289932	0.00362873	0.000793123	0.000527875
1371-02	0.0013906	0.00122323	0.00136998	0.00170922	0.00160391	0.00173204	0.00287813	0.00380894	0.000866229	0.000591271
1371-03	0.00133371	0.00124953	0.00135128	0.00166223	0.00164071	0.00165042	0.00293527	0.00403921	0.00104197	0.000863634
1371-04	0.00128417	0.00121621	0.00130936	0.00155535	0.00155901	0.00152232	0.00313275	0.00445352	0.00101078	0.000978539
1371-05	0.00124099	0.00118636	0.0012747	0.00136475	0.00139735	0.00134715	0.00334684	0.00485331	0.00102474	0.00119744
1371-06	0.00120945	0.0011882	0.00125867	0.00115221	0.00123942	0.00118973	0.00324735	0.00421143	0.000937845	0.00109603
1371-07	0.00120957	0.00117816	0.00128	0.00107618	0.00110987	0.00112876	0.00315054	0.00365271	0.000991979	0.00117985
1371-08	0.00119429	0.00118456	0.00125041	0.0010781	0.00107951	0.00107271	0.0030129	0.00325816	0.00111256	0.00136474
1371-09	0.00118859	0.00119221	0.00123379	0.00109883	0.00110446	0.00107472	0.00291777	0.0031512	0.00105087	0.00129271
1371-10	0.00119411	0.00121241	0.00124036	0.00118476	0.00121197	0.00118578	0.00287733	0.00317882	0.000864664	0.000929403
1371-11	0.00121586	0.00125486	0.00124049	0.00131196	0.00139319	0.00136	0.00293156	0.00335721	0.000783475	0.000761215
1371-12	0.00122688	0.00128396	0.00125053	0.00146915	0.00161224	0.00154051	0.00299126	0.00354882	0.000727804	0.00058507
1372-01	0.00125228	0.00130218	0.00125168	0.00158509	0.00173714	0.0016414	0.00298445	0.00369321	0.000736818	0.000543409
1372-02	0.00125853	0.00130393	0.00124734	0.00162515	0.00173059	0.00167049	0.00302065	0.00383649	0.000944382	0.000692414
1372-03	0.00124214	0.00129487	0.00123369	0.0016	0.00165639	0.00168851	0.00301334	0.0037802	0.000913085	0.000694162
1372-04	0.00124489	0.00131761	0.00121946	0.0015648	0.00161181	0.00161318	0.00319198	0.00407638	0.00106126	0.00108748
1372-05	0.00122636	0.00131555	0.00118494	0.00138627	0.00142373	0.00140474	0.00324455	0.00398238	0.000952637	0.00110946
1372-06	0.00124576	0.0013304	0.00117513	0.00124121	0.00124613	0.00121738	0.00333983	0.00391932	0.000988161	0.00135517
1372-07	0.00124796	0.00131326	0.00118237	0.00116225	0.00113908	0.00112165	0.00324209	0.00345837	0.00101563	0.00120844
1372-08	0.00124938	0.00132898	0.00119619	0.00115116	0.00109942	0.00107263	0.00313962	0.00321596	0.00116802	0.0013071
1372-09	0.00125762	0.00135093	0.00121437	0.00119701	0.00113898	0.00107256	0.0030142	0.0030794	0.0010686	0.00139692
1372-10	0.00128875	0.0013879	0.00122337	0.0013514	0.00126711	0.00115823	0.00294876	0.00309476	0.000771425	0.000739488
1372-11	0.00131372	0.00142993	0.00127505	0.00150802	0.00144023	0.00139186	0.00293256	0.00323743	0.000742315	0.000599266
1372-12	0.00134587	0.00145791	0.00132263	0.00167076	0.00161233	0.00160952	0.00295058	0.00348007	0.000778359	0.000634426
1373-01	0.00140535	0.00147844	0.00130803	0.00181479	0.00176722	0.0017592	0.00292203	0.00365209	0.000861162	0.000581527
1373-02	0.00148836	0.00145041	0.00127549	0.00189697	0.00180109	0.00180969	0.00293896	0.00382713	0.000920381	0.000639725
1373-03	0.00148764	0.00139759	0.00122097	0.00183797	0.00170811	0.00172598	0.00297522	0.0039803	0.000973635	0.000732039
1373-04	0.0014966	0.00135796	0.00122042	0.00174019	0.00160539	0.00161672	0.00310084	0.00417382	0.00110176	0.000981865
1373-05	0.00148189	0.00131374	0.00124409	0.00156883	0.00142446	0.00146291	0.00323838	0.00426965	0.000959084	0.00092715
1373-06	0.00148997	0.0012848	0.00127612	0.00140856	0.00124886	0.00129307	0.00324624	0.00399185	0.000867598	0.00108211
1373-07	0.0014936	0.00128241	0.00131758	0.00128482	0.00116177	0.00122509	0.00318571	0.0036893	0.0010615	0.00127021
1373-08	0.00149426	0.00126796	0.00135011	0.00123285	0.00113458	0.00124506	0.00304573	0.00327816	0.0010482	0.00120589
1373-09	0.00148834	0.00127134	0.00138548	0.00125338	0.00118642	0.0013213	0.00293188	0.00313362	0.00101621	0.00122443
1373-10	0.00147255	0.00129446	0.00135774	0.00136236	0.00127345	0.00135604	0.00287986	0.00314583	0.000939642	0.00108572
1373-11	0.00148802	0.00132994	0.00136821	0.00150077	0.00139573	0.00150912	0.00291746	0.00331445	0.00076873	0.000726773
1373-12	0.00150685	0.00133867	0.00142519	0.00167671	0.00154755	0.00170043	0.00299153	0.00368936	0.000768682	0.000621915
1374-01	0.00151288	0.00133562	0.00144601	0.00184368	0.00169693	0.00183338	0.00308183	0.00423768	0.000725422	0.000563167
1374-02	0.00145573	0.00132931	0.00139924	0.00180392	0.00174666	0.0017937	0.00306955	0.00433933	0.000863286	0.00065148
1374-03	0.00138442	0.00131576	0.00137445	0.00165789	0.00171149	0.00172265	0.00305365	0.00428978	0.00103849	0.000822288
1374-04	0.0013126	0.00131371	0.00137746	0.00143049	0.00165534	0.00163466	0.00316099	0.00454742	0.00100331	0.00102927
1374-05	0.00130702	0.00132262	0.00135806	0.00126284	0.00148615	0.00145099	0.00315115	0.00436365	0.000915988	0.00106363
1374-06	0.00132276	0.0013395	0.00135407	0.00112158	0.00133035	0.00132394	0.003152	0.00393943	0.000943911	0.00137326
1374-07	0.0013336	0.00132325	0.00133286	0.00105558	0.00124076	0.00122344	0.00307179	0.00353763	0.000905378	0.00123382
1374-08	0.00136421	0.00134096	0.00129146	0.00109992	0.00124033	0.00115893	0.00294379	0.00318526	0.00113443	0.00139405
1374-09	0.00137654	0.00138666	0.00127367	0.00118519	0.00131673	0.00114755	0.00283565	0.0030456	0.00102235	0.00118205
1374-10	0.00136088	0.00141008	0.00128886	0.00125191	0.00141617	0.00123837	0.00276968	0.0029413	0.000794099	0.000698084
1374-11	0.0013877	0.00140211	0.00130212	0.0014341	0.00155624	0.00138672	0.00276855	0.00306552	0.000810633	0.000658234
1374-12	0.00148397	0.00143035	0.00132058	0.00176265	0.00171927	0.00160818	0.00288854	0.00352469	0.000809974	0.000527843
1375-01	0.00149716	0.00145194	0.00132021	0.00196809	0.00181414	0.00175181	0.0029012	0.00372551	0.000799935	0.000599369
1375-02	0.00142345	0.00145742	0.00130685	0.00203226	0.00185381	0.00174255	0.00283335	0.00366059	0.000887611	0.000671643
1375-03	0.0013955	0.00144167	0.00129397	0.00202942	0.00177941	0.00172042	0.00288001	0.00376287	0.000871583	0.00069098
1375-04	0.00136726	0.00139956	0.00127353	0.0019346	0.00161131	0.00163599	0.00298616	0.00395991	0.000953468	0.00100492
1375-05	0.00136547	0.00137146	0.00125666	0.00175712	0.00140813	0.00143983	0.0032095	0.00441473	0.000989647	0.00124631
1375-06	0.00135121	0.00136557	0.00127453	0.00149706	0.00124233	0.00127279	0.00318698	0.00386303	0.00099606	0.00145492
1375-07	0.00132175	0.00136341	0.00128121	0.00127848	0.0011447	0.00117652	0.00306179	0.0034106	0.00104492	0.0013484
1375-08	0.00130569	0.00136667	0.00128041	0.00122132	0.00109882	0.00117482	0.00298013	0.00307407	0.00100037	0.00114148
1375-09	0.00131682	0.0013733	0.0012944	0.00122756	0.0011027	0.00121985	0.00289787	0.00298267	0.00111688	0.00131824
1375-10	0.00129591	0.00139741	0.00131777	0.0013035	0.00121433	0.00132254	0.0029137	0.0030386	0.000879716	0.000864746
1375-11	0.00132448	0.00141895	0.00132771	0.00154666	0.00139656	0.00142055	0.00293802	0.00320632	0.000699237	0.000488502
1375-12	0.00141759	0.00145287	0.0013479	0.001863	0.00165236	0.0016106	0.00293784	0.00347614	0.000769935	0.000607264
1376-01	0.00150206	0.00145066	0.00136742	0.00208959	0.00175495	0.00176745	0.00301087	0.00386357	0.000757008	0.000586191
1376-02	0.00150779	0.0014057	0.00137555	0.00210354	0.00170785	0.00183918	0.00296761	0.00389506	0.00089174	0.000680731
1376-03	0.0014726	0.00135534	0.00135669	0.00197096	0.00160464	0.00178604	0.00300483	0.00413433	0.00104362	0.000990096
1376-04	0.00148443	0.00131984	0.00135179	0.00182986	0.00151778	0.00169584	0.00306408	0.00428867	0.000914636	0.000831339
1376-05	0.00148095	0.0012743	0.00133156	0.0016172	0.00134568	0.00153032	0.00315975	0.00437242	0.000993291	0.00110715
1376-06	0.00150208	0.00128954	0.00133371	0.00139088	0.00122063	0.00136261	0.00324811	0.00422871	0.00104929	0.00133509
1376-07	0.00152369	0.00128248	0.00133305	0.00131419	0.00112737	0.00126253	0.00315207	0.00373084	0.00106175	0.00126692
1376-08	0.00151771	0.00127135	0.00131435	0.00132171	0.00107616	0.00119489	0.0030166	0.00340017	0.00115415	0.00151722
1376-09	0.00153363	0.00129149	0.00134151	0.00134183	0.00112722	0.00118538	0.00288668	0.00324648	0.0010342	0.00109918
1376-10	0.00154709	0.00131708	0.00136862	0.00148305	0.00124542	0.00126799	0.00285848	0.00328562	0.000934947	0.000957905
1376-11	0.00155974	0.00130993	0.00140071	0.00165924	0.00136704	0.00143959	0.00290854	0.00354903	0.000747517	0.000532818
1376-12	0.00156052	0.00130025	0.00146706	0.00184573	0.00151492	0.00169907	0.00293616	0.00376098	0.000758132	0.000592643
1377-01	0.00158553	0.00129042	0.001489	0.00202147	0.00164872	0.00183179	0.00300662	0.00403701	0.000784536	0.000634695
1377-02	0.00154833	0.00126816	0.00150722	0.00198586	0.0016476	0.00191296	0.00302759	0.00397733	0.000865091	0.000645862
1377-03	0.00149189	0.00123014	0.0015124	0.00193731	0.00153793	0.00184926	0.00305862	0.00413906	0.00103445	0.000909291
1377-04	0.00144577	0.0012214	0.00146326	0.00180232	0.00145485	0.0016704	0.0031003	0.00420748	0.000902387	0.000940233
1377-05	0.00140885	0.00121913	0.00144081	0.00154824	0.00131798	0.00153255	0.00322134	0.00448663	0.00103079	0.00116837
1377-06	0.00140552	0.00125118	0.0014653	0.00136069	0.00117185	0.00140958	0.00315612	0.0039908	0.000931263	0.00116074
1377-07	0.00140179	0.0012435	0.00144723	0.00126531	0.00111155	0.00132005	0.00298548	0.00327558	0.0011327	0.00135298
1377-08	0.00141114	0.00123468	0.001445	0.00125171	0.00108695	0.00129658	0.00279936	0.00286112	0.00122739	0.00156361
1377-09	0.00143502	0.00124246	0.00144789	0.00127751	0.00113665	0.00132578	0.00274354	0.00273593	0.0010133	0.00125981
1377-10	0.001421	0.00129263	0.00145766	0.00135197	0.00128776	0.00143588	0.00275828	0.00277824	0.000849077	0.000889818
1377-11	0.00143012	0.00132103	0.00147357	0.00152629	0.00146312	0.00161119	0.00280317	0.00297293	0.000831817	0.000812294
1377-12	0.0014594	0.00133173	0.0014778	0.00176601	0.00165008	0.00180995	0.0028215	0.00310965	0.000789172	0.000702484
1378-01	0.00145767	0.00133961	0.00142868	0.00192331	0.00178547	0.00184274	0.00281734	0.00334842	0.00506265	0.00105407
1378-02	0.00142345	0.00131734	0.00136534	0.00190542	0.00178566	0.00181044	0.00280433	0.00358327	0.00841518	0.00104871
1378-03	0.00140024	0.00129149	0.00133407	0.00177965	0.00171478	0.00176771	0.00285202	0.0036954	0.00857879	0.00109275
1378-04	0.00138461	0.00130672	0.00128771	0.00164196	0.00160297	0.00158465	0.00300328	0.00404874	0.00799904	0.00144789
1378-05	0.00137037	0.00131392	0.00123367	0.00147147	0.00146615	0.00137516	0.00308553	0.00404108	0.00729351	0.00149043
1378-06	0.00138224	0.00134211	0.00126487	0.00130289	0.00132099	0.00127176	0.00309191	0.00375942	0.00683956	0.00153926
1378-07	0.00261192	0.00240292	0.00430425	0.00121558	0.00121997	0.00118708	0.00462211	0.0032465	0.007371	0.0019775
1378-08	0.00757209	0.00740832	0.0137265	0.00114197	0.00118224	0.00117908	0.0109784	0.00299334	0.00743934	0.00156102
1378-09	0.0106461	0.0116158	0.0191691	0.00118288	0.00126505	0.00124842	0.0181155	0.0029581	0.00545973	0.00178005
1378-10	0.0113809	0.0139509	0.021517	0.00136458	0.00135486	0.0013882	0.0231614	0.00306874	0.00355462	0.00110262
1378-11	0.011797	0.0141322	0.0199349	0.00162135	0.0015422	0.00155799	0.0254483	0.00368861	0.00264311	0.000810341
1378-12	0.0113323	0.0132335	0.0200616	0.00203773	0.0019221	0.00186223	0.0252477	0.0043957	0.00210753	0.000631646
1379-01	0.0102127	0.0119988	0.0212209	0.00250565	0.00244075	0.00230444	0.0239817	0.00529244	0.0017483	0.000655013
1379-02	0.00943209	0.0115266	0.0215659	0.00280966	0.00272455	0.00282628	0.0225232	0.00633153	0.00160011	0.000723453
1379-03	0.00859317	0.0107506	0.0218056	0.00277115	0.00291681	0.00315516	0.0211112	0.00720734	0.00148686	0.000897748
1379-04	0.00787578	0.0107066	0.0223375	0.00268479	0.00320351	0.00334433	0.020096	0.00806828	0.00132467	0.00104949
1379-05	0.00738858	0.00990997	0.0217988	0.00253767	0.00304103	0.00329933	0.0193622	0.00822627	0.00123428	0.00122436
1379-06	0.00698229	0.00930374	0.0208664	0.00233156	0.00266655	0.00310826	0.0183892	0.00740578	0.00123115	0.00175838
1379-07	0.00631119	0.00847048	0.0190292	0.00214693	0.00245447	0.00282721	0.0169144	0.00647145	0.00111638	0.00136258
1379-08	0.00563912	0.0075014	0.0169398	0.00203532	0.00230129	0.00267914	0.0151848	0.00585079	0.00117269	0.0011248
1379-09	0.00497672	0.00666184	0.0150449	0.00202928	0.00228352	0.00286133	0.0135773	0.00555631	0.00122888	0.00142003
1379-10	0.00445757	0.00595842	0.0135764	0.0021828	0.00237224	0.00323509	0.012038	0.00557915	0.000968777	0.00102812
1379-11	0.0042252	0.00536488	0.0125004	0.00246824	0.00248038	0.00368283	0.0109646	0.00582985	0.000804589	0.000776271
1379-12	0.00395999	0.00493974	0.0118057	0.00273004	0.00261128	0.004326	0.0100509	0.00621209	0.000719044	0.000507774
1380-01	0.00367641	0.00451335	0.0110349	0.0029355	0.00281697	0.00485797	0.00914385	0.00644241	0.000851833	0.000560987
1380-02	0.00340579	0.00417782	0.0103599	0.00293909	0.00282612	0.00513158	0.00845166	0.00668972	0.000928399	0.000610774
1380-03	0.00311153	0.00393926	0.00977561	0.00266317	0.00270588	0.00486071	0.00781097	0.00654283	0.00097597	0.00092092
1380-04	0.00296861	0.00371645	0.0093191	0.00239659	0.00251235	0.00450526	0.0075028	0.00684482	0.00100227	0.000972995
1380-05	0.0028932	0.00352019	0.00870768	0.00210893	0.00222454	0.00408377	0.00738126	0.00700007	0.00100403	0.0011238
1380-06	0.00287001	0.00338499	0.00822242	0.00190143	0.00195145	0.0035599	0.00718161	0.00640028	0.000978814	0.00132217
1380-07	0.00274074	0.00326202	0.00779469	0.00169219	0.00180056	0.00316793	0.00675035	0.00538407	0.00109219	0.00144451
1380-08	0.00267216	0.00308057	0.00717442	0.00165916	0.00172539	0.00305408	0.0063249	0.00493772	0.00127352	0.00165551
1380-09	0.00255827	0.00293476	0.00661339	0.0016908	0.00171678	0.00312714	0.0059361	0.00473021	0.00115851	0.00154626
1380-10	0.00248654	0.00272093	0.00609199	0.00184933	0.00177103	0.003322	0.00558459	0.00475989	0.000987028	0.0011293
1380-11	0.00241017	0.00265463	0.00566685	0.00207275	0.00199321	0.00359533	0.00534886	0.00498031	0.000762128	0.000674267
1380-12	0.00237824	0.00260669	0.00531898	0.00237674	0.00232644	0.00392543	0.00518747	0.00543676	0.000766162	0.000541017
1381-01	0.0152224	0.0140135	0.0177623	0.0055658	0.00671357	0.00740813	0.0136691	0.00653659	0.0144875	0.00361187
1381-02	0.0510354	0.0467028	0.0548482	0.0238517	0.0277773	0.0228886	0.0388062	0.0189455	0.0244885	0.00971036
1381-03	0.0604886	0.0587145	0.0680808	0.038762	0.0427797	0.0367627	0.0539219	0.0426401	0.0266612	0.0161894
1381-04	0.0614942	0.0615475	0.0718384	0.0430166	0.0486731	0.0447568	0.0599355	0.0645528	0.0263702	0.0191759
1381-05	0.0601833	0.0614382	0.0699768	0.0459414	0.053076	0.0485887	0.0619816	0.069036	0.0254131	0.0197788
1381-06	0.0585168	0.0592597	0.06696	0.0462943	0.0529514	0.0470613	0.0622987	0.0659679	0.0240441	0.0185216
1381-07	0.0555768	0.0567241	0.0633075	0.0412209	0.0493315	0.0433516	0.0610484	0.0601193	0.0229117	0.016599
1381-08	0.0524004	0.0541922	0.0597672	0.0369178	0.0447705	0.0404649	0.059365	0.0564144	0.0219617	0.0155128
1381-09	0.0502902	0.0525876	0.0560144	0.0357849	0.0435309	0.0374754	0.0579894	0.055479	0.0207282	0.0147654
1381-10	0.0479341	0.0504809	0.0534319	0.0367884	0.0431238	0.0379217	0.0568851	0.0572886	0.0193851	0.0145955
1381-11	0.0459665	0.0487667	0.0518131	0.0392971	0.0437732	0.0435973	0.0559493	0.0596087	0.0182378	0.0150365
1381-12	0.0439574	0.0471445	0.0490545	0.0438879	0.0474395	0.0469793	0.0545056	0.0616418	0.0172728	0.0160545
1382-01	0.0413141	0.0430416	0.0457022	0.0470489	0.0467664	0.0465253	0.0519644	0.0617413	0.0164223	0.0169908
1382-02	0.0369749	0.0388646	0.0419684	0.0427705	0.0443607	0.0426927	0.0485908	0.0607193	0.0156459	0.0177519
1382-03	0.0333607	0.0354017	0.0391232	0.037533	0.0403911	0.039434	0.0450905	0.0566322	0.0146275	0.0168839
1382-04	0.0309964	0.0323514	0.0373686	0.0331225	0.0356526	0.0361222	0.0419564	0.0523217	0.0135459	0.0157149
1382-05	0.0291953	0.0305585	0.0351839	0.0299829	0.0319728	0.0326622	0.0392871	0.0461671	0.0124497	0.014639
1382-06	0.0276769	0.0285828	0.0330938	0.0265882	0.0279552	0.0290077	0.0368522	0.0395124	0.0114206	0.0129682
1382-07	0.0260693	0.0264785	0.0310149	0.0236089	0.0243278	0.0257136	0.0340171	0.0325077	0.0110088	0.0115364
1382-08	0.0244394	0.0250513	0.0292743	0.0222679	0.0228764	0.02352	0.0315543	0.0284011	0.0105648	0.0104501
1382-09	0.0232078	0.0238507	0.0274371	0.0217128	0.0233167	0.0231463	0.0297719	0.0268118	0.00897233	0.00949066
1382-10	0.0222873	0.0230481	0.025961	0.0222937	0.0245061	0.0241113	0.0281163	0.0269556	0.00753904	0.00829914
1382-11	0.0212323	0.0225621	0.0247324	0.0240016	0.0262792	0.0253505	0.0266542	0.0286353	0.00661471	0.00737068
1382-12	0.020235	0.0216737	0.0233399	0.0253269	0.0271309	0.0263681	0.0249932	0.0305953	0.0058623	0.00661088
1383-01	0.0187325	0.020573	0.0217234	0.0254355	0.0274438	0.0271589	0.0231939	0.0313523	0.00521654	0.00582895
1383-02	0.0172792	0.0191491	0.0201939	0.0242468	0.026633	0.025966	0.0213679	0.030952	0.00460093	0.00509042
1383-03	0.0156964	0.017413	0.0185055	0.0211824	0.0235776	0.0236124	0.0199472	0.029502	0.00402971	0.00424497
1383-04	0.0141446	0.0158402	0.0167988	0.0177564	0.0202072	0.0203097	0.0187759	0.0272345	0.00349489	0.00369936
1383-05	0.0126525	0.0142028	0.0151871	0.014856	0.0166595	0.016571	0.018056	0.0251338	0.00301483	0.00322955
1383-06	0.0114722	0.0127261	0.0141759	0.0121491	0.0134636	0.0141074	0.0170194	0.0215256	0.00266113	0.00295523
1383-07	0.0106448	0.0114119	0.0132655	0.0103124	0.0107299	0.0120622	0.0159704	0.0182873	0.00259109	0.00289448
1383-08	0.00988456	0.0102993	0.0122588	0.00943633	0.00927599	0.011024	0.0149856	0.0161988	0.00235931	0.00235743
1383-09	0.00948892	0.00969255	0.0115663	0.00936701	0.00905653	0.0108661	0.0140938	0.0153405	0.00216684	0.00223637
1383-10	0.00912779	0.00936994	0.0111874	0.0097525	0.0094285	0.0114777	0.0132954	0.0149497	0.00166798	0.00160836
1383-11	0.00875337	0.00904039	0.0107396	0.0102405	0.00996556	0.0120455	0.0126264	0.0150531	0.00135196	0.00124979
1383-12	0.00823947	0.00837918	0.0101988	0.0102892	0.010175	0.012641	0.0119915	0.0150656	0.00128447	0.00111143
1384-01	0.00768968	0.00776852	0.00946296	0.0102321	0.00992956	0.0123358	0.0111653	0.0149036	0.00116453	0.000816722
1384-02	0.00678145	0.00724708	0.00843684	0.00884277	0.00917206	0.0108574	0.0102887	0.0140689	0.00126549	0.000935908
1384-03	0.00605154	0.00675827	0.00763968	0.0073953	0.00824901	0.00921011	0.00944907	0.0128958	0.00115504	0.00100825
1384-04	0.005565	0.00617663	0.00716628	0.00625188	0.00689485	0.00815786	0.00900476	0.0122795	0.00116147	0.0011621
1384-05	0.0051238	0.00566573	0.00659797	0.00518036	0.00575018	0.00693104	0.00864666	0.0113609	0.00111945	0.00123833
1384-06	0.00481858	0.00539259	0.00604866	0.00441706	0.00483136	0.00580637	0.00803593	0.00944435	0.001091	0.00138096
1384-07	0.00452116	0.00517706	0.00564033	0.00381175	0.00429997	0.00493956	0.00749643	0.0078519	0.00116775	0.00141796
1384-08	0.00426642	0.00499536	0.00524817	0.00358364	0.00405924	0.00457945	0.0069755	0.00695644	0.00124703	0.00153159
1384-09	0.00416424	0.0049192	0.00509058	0.0036613	0.00416281	0.00456805	0.00649692	0.00630168	0.00109708	0.0012513
1384-10	0.00400529	0.00488478	0.00496197	0.00384398	0.0045498	0.00478651	0.00618517	0.00626736	0.00093817	0.000938662
1384-11	0.00382921	0.00473484	0.00486997	0.00403488	0.00502692	0.00521699	0.0060119	0.00649356	0.00074704	0.000655715
1384-12	0.003729	0.00457005	0.00473492	0.00436366	0.00543221	0.00556989	0.00584235	0.00703958	0.000737463	0.000579087
1385-01	0.00361312	0.00437316	0.00453182	0.00445669	0.00563422	0.00572576	0.00564086	0.00736004	0.000809186	0.000555247
1385-02	0.0033668	0.0041085	0.00419964	0.00408174	0.00550596	0.00543171	0.00537499	0.00742876	0.00102114	0.00072422
1385-03	0.00318352	0.00377559	0.00389613	0.00367794	0.00509121	0.00485165	0.00515426	0.00748619	0.0011004	0.000916596
1385-04	0.00303398	0.00351148	0.003618	0.00329055	0.0045442	0.00420887	0.00496836	0.00711585	0.000970359	0.000824784
1385-05	0.00285917	0.00328748	0.00342717	0.00286917	0.00393518	0.00371419	0.00504904	0.00717112	0.000910493	0.000983385
1385-06	0.0027472	0.0031331	0.0032743	0.00244868	0.00334046	0.00314854	0.00521738	0.00713594	0.00100447	0.00139728
1385-07	0.00265147	0.00302959	0.00316821	0.00215243	0.00291562	0.00286042	0.00488787	0.00595512	0.000981294	0.00111953
1385-08	0.00260837	0.00292143	0.00301791	0.0020755	0.0027625	0.00261355	0.00452035	0.00489089	0.00112953	0.00133321
1385-09	0.00253718	0.00287859	0.00291927	0.00205223	0.00283673	0.00249825	0.0043626	0.00466265	0.00115996	0.00131932
1385-10	0.00250338	0.00284263	0.00278825	0.00221361	0.00303789	0.00257026	0.00424052	0.00464242	0.000999698	0.0010638
1385-11	0.00246866	0.00282744	0.0027604	0.00248931	0.00325943	0.00285238	0.00420263	0.00484999	0.000718457	0.000594012
1385-12	0.00244513	0.00274669	0.0026757	0.00274477	0.00343629	0.00313355	0.00417219	0.00521615	0.000744049	0.000611543
1386-01	0.00245549	0.00262272	0.00252942	0.00300426	0.00347675	0.00324735	0.00410848	0.00548328	0.000803853	0.000629837
1386-02	0.00234899	0.00245862	0.0023836	0.00299194	0.00323764	0.00315178	0.00400935	0.00546651	0.000897376	0.000634788
1386-03	0.00218115	0.00232289	0.00224382	0.0026818	0.00297113	0.00293794	0.00395259	0.00528593	0.00100877	0.0008306
1386-04	0.00207	0.00211995	0.00209869	0.00239984	0.00254211	0.00262485	0.00401432	0.00535682	0.000892731	0.000819753
1386-05	0.00198608	0.00188801	0.00196791	0.00210107	0.00201145	0.00227205	0.00400842	0.00506162	0.000894304	0.00106394
1386-06	0.001928	0.00175542	0.00190137	0.00180237	0.00167237	0.0019137	0.00405638	0.00494699	0.000911826	0.00122413
1386-07	0.0018822	0.00166679	0.00184282	0.00159555	0.00149864	0.00164012	0.0038592	0.00429584	0.0011715	0.00149441
1386-08	0.00185204	0.0016301	0.00178972	0.00154449	0.00142269	0.00153218	0.0037181	0.003967	0.00120962	0.00141019
1386-09	0.00181342	0.00161663	0.00177179	0.00158281	0.00143824	0.00157615	0.0035786	0.00374297	0.00100637	0.00116834
1386-10	0.00178083	0.00158639	0.00174066	0.00171686	0.00153323	0.00170472	0.00344892	0.00364475	0.00083517	0.000929674
1386-11	0.00176701	0.00156703	0.00164943	0.00189625	0.00167976	0.0018671	0.00349987	0.0038748	0.000782675	0.00084427
1386-12	0.00177132	0.00154157	0.00163886	0.00207681	0.0018224	0.00204062	0.00348046	0.00404071	0.000691121	0.000474372
1387-01	0.00175342	0.00149556	0.00162475	0.0022191	0.00188973	0.00217548	0.00340585	0.0041831	0.000805755	0.000612876
1387-02	0.00166316	0.00143082	0.00151713	0.00217891	0.0018056	0.00199399	0.0033696	0.00436942	0.000888125	0.000741035
1387-03	0.00156161	0.00137434	0.0013851	0.00197156	0.0016506	0.00173134	0.00331974	0.00446661	0.0009179	0.000737757
1387-04	0.00149959	0.00132726	0.00132766	0.00176483	0.00147411	0.0016066	0.00336571	0.00463384	0.000971558	0.00090824
1387-05	0.00144507	0.00127123	0.00126311	0.0015539	0.00123982	0.00138831	0.00338382	0.00454552	0.000980496	0.00120409
1387-06	0.00140959	0.00124632	0.00122475	0.00134907	0.00111331	0.00115827	0.00340972	0.00424878	0.000924028	0.00120225
1387-07	0.00138518	0.00122356	0.00122269	0.00119068	0.00101072	0.00106623	0.00336295	0.00392544	0.000965111	0.00117831
1387-08	0.00136388	0.00119415	0.00116128	0.00115674	0.000962407	0.000965854	0.00312883	0.0032912	0.00120969	0.00146739
1387-09	0.00135895	0.00117901	0.00114573	0.0012045	0.000986286	0.000971211	0.0030221	0.00318307	0.00102544	0.00129961
1387-10	0.00135636	0.00116783	0.0011355	0.00132973	0.00107871	0.00105384	0.00295536	0.00315344	0.00077502	0.000714681
1387-11	0.00134986	0.00116439	0.00113033	0.0014858	0.00119938	0.00117746	0.00300753	0.00330347	0.000779834	0.000652623
1387-12	0.00131873	0.00114857	0.00111463	0.00165974	0.0012951	0.00129178	0.00310075	0.00365209	0.000731723	0.000627179
1388-01	0.00129243	0.00109131	0.00108688	0.00174163	0.00132383	0.00137554	0.00308105	0.00377153	0.000761001	0.00049898
1388-02	0.0012317	0.00102418	0.001049	0.00164493	0.00128244	0.00130991	0.00302407	0.00380321	0.000998757	0.000774879
1388-03	0.00118031	0.00097137	0.00101403	0.00155243	0.00119949	0.00118886	0.00304125	0.00385805	0.000992861	0.000889536
1388-04	0.00114356	0.000975762	0.000989684	0.00143757	0.00116347	0.00108463	0.00314351	0.00401196	0.000889638	0.000718663
1388-05	0.00110485	0.000933877	0.000960248	0.00127024	0.000977472	0.000972391	0.00326324	0.00398958	0.000896051	0.00107134
1388-06	0.0010685	0.000922844	0.000946098	0.00108863	0.000852843	0.000859045	0.00331013	0.00369542	0.000935846	0.00125406
1388-07	0.0010661	0.00092672	0.000965883	0.00104439	0.000781069	0.000831851	0.00320798	0.00343545	0.0011079	0.00127539
1388-08	0.00106895	0.00091056	0.000993862	0.0010043	0.000746468	0.000897309	0.00308443	0.00321407	0.00108967	0.00150184
1388-09	0.00107067	0.000900957	0.00100538	0.00100557	0.000762697	0.000947725	0.00300166	0.00314396	0.00114944	0.00137698
1388-10	0.00106927	0.0008857	0.000990304	0.00108122	0.000867442	0.00101966	0.00296499	0.00314915	0.000834731	0.000885402
1388-11	0.00105398	0.000880426	0.000981353	0.00121262	0.000969289	0.00109228	0.00297711	0.00326208	0.000681382	0.000629942
1388-12	0.00106037	0.000873165	0.000985899	0.00132375	0.00105716	0.00120643	0.00297658	0.00339022	0.000655415	0.000418402
1389-01	0.00105151	0.000901555	0.000999655	0.00141158	0.00117251	0.00129979	0.00303402	0.00376322	0.0156632	0.0026857
1389-02	0.001023	0.000912391	0.000959652	0.00141563	0.00121139	0.00127384	0.00316065	0.00414424	0.0295704	0.0159018
1389-03	0.000995128	0.000891284	0.000917708	0.00131872	0.0011704	0.00119667	0.00307149	0.00412353	0.0342173	0.031478
1389-04	0.0108319	0.0134168	0.0103005	0.00227048	0.00433887	0.00144783	0.0111042	0.00704822	0.0350695	0.0406271
1389-05	0.0545926	0.0601802	0.0478243	0.0183098	0.0269776	0.0106374	0.0424512	0.0294613	0.0345896	0.0416994
1389-06	0.0766721	0.0787463	0.0673667	0.0342299	0.0435645	0.0241871	0.0654211	0.0468106	0.0337149	0.0401412
1389-07	0.0835351	0.0802522	0.0716178	0.0381313	0.0438086	0.0261217	0.0744049	0.0503082	0.0329145	0.03804
1389-08	0.0836264	0.077295	0.0693159	0.0401833	0.0453911	0.0266695	0.0769346	0.0481231	0.0318065	0.0359042
1389-09	0.0816167	0.0743292	0.0667191	0.0426102	0.0459724	0.0265444	0.0768484	0.0458755	0.0303004	0.0351365
1389-10	0.0787111	0.0719566	0.0649883	0.0496618	0.049428	0.0286346	0.0749713	0.0463912	0.0288986	0.0357778
1389-11	0.0765352	0.0699425	0.0629393	0.0567565	0.053663	0.0317107	0.0724455	0.0525635	0.0279543	0.037154
1389-12	0.0716021	0.0676679	0.0592883	0.0570493	0.0583097	0.0350002	0.0694982	0.0609533	0.0269196	0.037966
1390-01	0.0651639	0.0640372	0.0567163	0.0545669	0.062983	0.0384623	0.0666432	0.0691633	0.0258165	0.0380453
1390-02	0.0601447	0.05945	0.0524609	0.0521044	0.0609584	0.0379889	0.0638616	0.0754695	0.0244748	0.0364016
1390-03	0.0551955	0.0551717	0.0485452	0.0472276	0.054973	0.0360924	0.0611731	0.0763674	0.0227435	0.0331957
1390-04	0.0505506	0.0497035	0.0443698	0.0416886	0.0470552	0.0316569	0.0588888	0.0743483	0.0209324	0.0300586
1390-05	0.0464504	0.0458491	0.0419415	0.037891	0.0405634	0.0295422	0.0571025	0.0695594	0.0189323	0.0263389
1390-06	0.0417442	0.0428058	0.0399594	0.032498	0.0353234	0.0274301	0.0554508	0.0626841	0.0176264	0.0235838
1390-07	0.0374929	0.0392783	0.0373602	0.0281247	0.030606	0.0252164	0.0530166	0.0549582	0.0170065	0.0205593
1390-08	0.0344578	0.0368917	0.0345439	0.0248184	0.0283797	0.0237299	0.0503129	0.0501799	0.0159568	0.0184017
1390-09	0.0312787	0.0346819	0.0318941	0.0237131	0.0280135	0.0234205	0.0478926	0.048196	0.014245	0.0166117
1390-10	0.0291505	0.0328544	0.0299342	0.0243522	0.0297161	0.0245147	0.0456932	0.0480083	0.0126047	0.0155384
1390-11	0.0272516	0.0312468	0.0287014	0.02492	0.0313203	0.0265393	0.0436498	0.0485105	0.0113058	0.014197
1390-12	0.0251602	0.0298236	0.02692	0.0253908	0.0329914	0.0276759	0.0413761	0.0477025	0.0102358	0.0134793
1391-01	0.0229879	0.0277967	0.0252669	0.0250283	0.0331359	0.028619	0.038763	0.0467345	0.00931832	0.0126902
1391-02	0.0207023	0.0261987	0.0237177	0.0227107	0.0318394	0.0286173	0.0357733	0.0449652	0.00838008	0.0113617
1391-03	0.0187097	0.0235739	0.0216787	0.0201413	0.0274706	0.0250161	0.0328122	0.0411275	0.00742838	0.00953661
1391-04	0.0172642	0.0214234	0.019911	0.0181395	0.0235283	0.0205682	0.0303448	0.0370315	0.00641226	0.00769974
1391-05	0.0160858	0.0192578	0.0184895	0.0163632	0.0200194	0.0175712	0.0280273	0.0324333	0.0055199	0.00640313
1391-06	0.015069	0.0176648	0.0169507	0.0143074	0.0169975	0.0150368	0.026141	0.0280903	0.0049608	0.00569618
1391-07	0.0136575	0.0164218	0.0155519	0.0120957	0.0147	0.0129099	0.0239679	0.0228381	0.00455288	0.00487322
1391-08	0.0123586	0.0152044	0.0143816	0.0107809	0.0133875	0.0117102	0.0218589	0.0193253	0.00421456	0.00436517
1391-09	0.0117806	0.0144812	0.013435	0.0105389	0.0133353	0.0114876	0.0201734	0.017961	0.00343484	0.00372636
1391-10	0.0113416	0.0137686	0.0129211	0.0107305	0.0139596	0.0121206	0.0186584	0.0172775	0.00275138	0.0028263
1391-11	0.0108715	0.0131145	0.0123492	0.0110842	0.0147363	0.0130427	0.0174889	0.0175221	0.00236655	0.00238784
1391-12	0.0104215	0.012569	0.0118468	0.0116744	0.0156871	0.0137944	0.0163606	0.0183163	0.00197185	0.00183658
1392-01	0.00979496	0.0115045	0.0111901	0.0118003	0.0150451	0.0140674	0.0151098	0.0182225	0.00168429	0.00159551
1392-02	0.00888414	0.0104543	0.010229	0.0108481	0.0134284	0.0130194	0.0139186	0.0181108	0.00163883	0.00146731
1392-03	0.00830629	0.00926283	0.00926977	0.00994622	0.0111576	0.0112953	0.012827	0.0177437	0.00150278	0.00136363
1392-04	0.00781534	0.00851574	0.00854049	0.00878641	0.00960266	0.0100093	0.012165	0.0167872	0.00139569	0.00130405
1392-05	0.0073992	0.00791007	0.00782068	0.00762736	0.00825363	0.00839341	0.0117137	0.0156601	0.00129944	0.00153673
1392-06	0.00696388	0.00732774	0.00758527	0.0066377	0.00708807	0.00737582	0.0112989	0.0138376	0.00124987	0.00145238
1392-07	0.00659297	0.00670389	0.00716029	0.00593616	0.00603697	0.00661118	0.0104901	0.0116525	0.00137296	0.00160457
1392-08	0.00623781	0.0062893	0.00684355	0.00549658	0.00548765	0.00623375	0.0098658	0.0104528	0.00137876	0.00168727
1392-09	0.00601121	0.00593034	0.00659306	0.0054757	0.00543826	0.00626598	0.0093104	0.00981353	0.00113214	0.0013938
1392-10	0.00588195	0.00569544	0.00633384	0.00581729	0.00556197	0.00650439	0.0087833	0.00958246	0.000952775	0.000980678
1392-11	0.0057482	0.00550782	0.00609222	0.00624833	0.00577829	0.00684823	0.00840523	0.00974495	0.000857147	0.000728564
1392-12	0.00558198	0.00519939	0.00582441	0.00661203	0.00601941	0.00711284	0.00805109	0.0099287	0.000778134	0.000650975
1393-01	0.00539026	0.00478173	0.00548871	0.00681625	0.00597244	0.00712953	0.00757764	0.00972786	0.00088835	0.000671654
1393-02	0.00502624	0.00438279	0.00495905	0.00635308	0.00546133	0.00652939	0.00717618	0.00958205	0.000972245	0.000729818
1393-03	0.00470445	0.00405163	0.00446495	0.0057275	0.00478649	0.00557836	0.00678227	0.00915474	0.000945284	0.00087566
1393-04	0.0044594	0.00372761	0.00412533	0.00503149	0.00413311	0.00497247	0.00639699	0.00863136	0.000991417	0.0010276
1393-05	0.00418001	0.00350114	0.00382093	0.00441774	0.00367582	0.00421217	0.0061412	0.00794348	0.0010409	0.00120681
1393-06	0.00394005	0.00334144	0.00359655	0.00378749	0.00314282	0.00351752	0.00589173	0.00703804	0.000920645	0.00130191
1393-07	0.00373992	0.0031906	0.00336873	0.00323818	0.00270306	0.0030065	0.00549878	0.00596902	0.00105932	0.00135766
1393-08	0.00355725	0.00306142	0.00319268	0.0029895	0.00250054	0.00280934	0.0050582	0.00502574	0.00116022	0.00135986
1393-09	0.00344368	0.00299696	0.00303684	0.002997	0.00252249	0.00273736	0.00475376	0.00463593	0.0010376	0.00121935
1393-10	0.00336207	0.00294626	0.00297108	0.00324597	0.00271589	0.00289084	0.00455576	0.00458194	0.000891971	0.00100863
1393-11	0.0032626	0.00290597	0.00288418	0.00355492	0.00301944	0.0031082	0.00444255	0.00475924	0.000771433	0.000621818
1393-12	0.00317054	0.0028516	0.00275203	0.00383232	0.00331184	0.00338152	0.00440649	0.00507602	0.000736919	0.000567211
1394-01	0.00306385	0.0027413	0.00265374	0.00400665	0.00339454	0.00355377	0.00428204	0.0052666	0.000715693	0.000492727
1394-02	0.00291276	0.00254397	0.00246476	0.00388082	0.00321805	0.00338033	0.00420347	0.00549534	0.000822771	0.000667045
1394-03	0.00270309	0.00238811	0.00225904	0.00352552	0.00297932	0.00301887	0.00406047	0.00543356	0.000875183	0.00071629
1394-04	0.00248886	0.00225462	0.00210652	0.00302841	0.00265678	0.00264691	0.00405223	0.00556757	0.00101991	0.000917488
1394-05	0.00228711	0.00212064	0.00198196	0.00259716	0.00230917	0.00229774	0.0040401	0.005341	0.000940588	0.000948255
1394-06	0.00220715	0.00206648	0.00189921	0.00225636	0.00199248	0.00197563	0.00402843	0.00487191	0.00096401	0.00118168
1394-07	0.00213229	0.00203254	0.00186171	0.00203088	0.00180967	0.00178415	0.00394249	0.00446006	0.00117841	0.0015311
1394-08	0.0020618	0.00196689	0.00183541	0.00190362	0.00172817	0.00170781	0.00372839	0.00390248	0.00113554	0.00134979
1394-09	0.00204427	0.00193972	0.00181529	0.00192596	0.00171451	0.00174668	0.0035759	0.00372672	0.00115479	0.00150329
1394-10	0.00200525	0.00189853	0.00177853	0.00203984	0.0017994	0.00187182	0.00351555	0.00370939	0.000869837	0.000857077
1394-11	0.00194501	0.00187309	0.00177744	0.00220933	0.00196793	0.00208114	0.00351126	0.00383794	0.000735598	0.000676609
1394-12	0.0019213	0.00182887	0.00173312	0.00244682	0.00217051	0.0022447	0.00357575	0.00413537	0.000676695	0.000459493
1395-01	0.00181886	0.00173135	0.0016943	0.00253988	0.00222058	0.00235065	0.00355074	0.0042832	0.000743997	0.000555817
1395-02	0.00169754	0.00161441	0.00160756	0.0023756	0.00210839	0.0022461	0.00341353	0.00402447	0.0008653	0.000624001
1395-03	0.00156624	0.00148962	0.0015268	0.00217362	0.00189785	0.00206608	0.00337839	0.00396428	0.0010517	0.000865911
1395-04	0.00146977	0.00140128	0.0014629	0.00192124	0.00168279	0.00184867	0.00338131	0.00397274	0.000905986	0.000726483
1395-05	0.00141764	0.00132804	0.00138024	0.00167994	0.0014238	0.00158103	0.00348065	0.00400846	0.000896128	0.000956501
1395-06	0.00139857	0.00128386	0.00133148	0.00146926	0.00119208	0.00134775	0.00351845	0.00385136	0.000879164	0.00130231
1395-07	0.00137305	0.00127388	0.00129259	0.00132719	0.00107625	0.00118096	0.00349245	0.00359449	0.000943856	0.00107451
1395-08	0.0013415	0.00125056	0.00126444	0.00125779	0.00104736	0.00116192	0.00341101	0.00339629	0.00114797	0.00144373
1395-09	0.00134219	0.00125498	0.00125681	0.00129755	0.00109351	0.00114982	0.00328741	0.00320887	0.000985756	0.00121561
1395-10	0.00137359	0.00125826	0.00122394	0.00143207	0.00121444	0.00122729	0.00321543	0.00317801	0.000852406	0.000906939
1395-11	0.00138148	0.00123734	0.0011941	0.00158238	0.00135013	0.00131913	0.00315373	0.00322857	0.000681577	0.000570631
1395-12	0.00138498	0.00123587	0.00119606	0.00176845	0.00148125	0.0014645	0.00320351	0.00355193	0.000735986	0.000511495
1396-01	0.00136478	0.00119144	0.0011935	0.00184754	0.0015448	0.00157951	0.00316198	0.00374131	0.000776298	0.000506367
1396-02	0.00130832	0.00109281	0.00115875	0.00177912	0.00143517	0.00151933	0.00311766	0.00384194	0.000859922	0.000634652
1396-03	0.00124266	0.00099371	0.00111849	0.00161384	0.00126419	0.00137826	0.00304874	0.00385195	0.00103134	0.000923082
1396-04	0.00120246	0.000927234	0.0010729	0.00143576	0.00110826	0.00121866	0.00315665	0.00421974	0.000968319	0.000921509
1396-05	0.00117987	0.000866622	0.00104716	0.00124056	0.000914268	0.0010518	0.00322765	0.0041837	0.000954308	0.00101689
1396-06	0.00116334	0.000840152	0.00101753	0.00107694	0.000836858	0.000892574	0.00328565	0.00402171	0.000944764	0.00122843
1396-07	0.00114848	0.000834785	0.00101956	0.00100183	0.000819551	0.000810965	0.00313837	0.00347758	0.00109727	0.00139613
1396-08	0.00114211	0.000802901	0.00100095	0.000984587	0.000810262	0.00079335	0.00300327	0.0031579	0.00109646	0.00138197
1396-09	0.00113908	0.000793016	0.000988551	0.0010167	0.000828649	0.000821169	0.00292521	0.00299699	0.000992094	0.00109006
1396-10	0.00110844	0.000780928	0.000973434	0.00108907	0.000876046	0.000898706	0.00286514	0.00301154	0.000832674	0.000867367
1396-11	0.00110524	0.000753886	0.00096035	0.00121796	0.000953107	0.000989764	0.00287131	0.00321613	0.000737183	0.000766298
1396-12	0.00110484	0.000744236	0.000951943	0.00134847	0.00101303	0.00108629	0.00292809	0.00344365	0.000711583	0.000572128
1397-01	0.00111296	0.000736975	0.000949561	0.00149342	0.00106349	0.00120704	0.00297894	0.0037369	0.000768189	0.000522147
1397-02	0.00108398	0.000731946	0.000900991	0.00142183	0.00104149	0.00115642	0.00302546	0.00404218	0.000839952	0.00060934
1397-03	0.00107054	0.000744793	0.000885164	0.0013796	0.000974298	0.00114913	0.00298501	0.00401982	0.000910745	0.000753286
1397-04	0.00103111	0.000736217	0.000865677	0.0012942	0.000880256	0.00107443	0.0030795	0.00412726	0.000890814	0.000937027
1397-05	0.000966124	0.000716864	0.000838401	0.00110074	0.00076387	0.000915905	0.00326924	0.00450497	0.000957684	0.00109743
1397-06	0.000955694	0.000745351	0.000836777	0.000987697	0.000711011	0.000810989	0.00326917	0.00398036	0.00091596	0.00123303
1397-07	0.000937507	0.000755532	0.000847173	0.000904727	0.000702834	0.000770964	0.00322362	0.00354341	0.000996707	0.0012245
1397-08	0.000927062	0.00078592	0.00086865	0.000870115	0.000756228	0.000768783	0.00310226	0.00337057	0.00117018	0.00149736
1397-09	0.000949273	0.000796207	0.000885113	0.000887942	0.000787885	0.00078365	0.00296302	0.00307991	0.00112811	0.00138616
1397-10	0.000929787	0.000806771	0.0009073	0.000968223	0.000845468	0.00085766	0.00292861	0.00305258	0.00107789	0.0012395
1397-11	0.000918976	0.000819147	0.000918909	0.00106534	0.000934061	0.000996874	0.00296092	0.00318194	0.00080761	0.000643783
1397-12	0.000928372	0.000829797	0.00093456	0.00115748	0.000992423	0.00114233	0.00296324	0.00336784	0.000797785	0.000640027
1398-01	0.000920027	0.000803886	0.000950654	0.00122916	0.00100772	0.00125687	0.00298041	0.00356685	0.00070525	0.00040372
1398-02	0.000889866	0.000805305	0.000936176	0.0012051	0.00108276	0.00124315	0.00299786	0.00367028	0.000800122	0.000583772
1398-03	0.000853912	0.000778014	0.000944505	0.00113167	0.00104441	0.00124233	0.00296514	0.00362453	0.000977043	0.000774487
1398-04	0.000861619	0.000775392	0.000921724	0.00107272	0.000983412	0.00113772	0.00311305	0.00392388	0.000969849	0.000806696
1398-05	0.000854047	0.00078906	0.000919829	0.000941921	0.000850801	0.00099194	0.00322651	0.00400017	0.000939582	0.00120471
1398-06	0.000866554	0.000847685	0.00093925	0.000853469	0.000751637	0.000849169	0.0031951	0.00367698	0.000937754	0.00135247
1398-07	0.000893747	0.000887546	0.000979997	0.000815936	0.000726356	0.000817447	0.00310353	0.00334378	0.00105571	0.00140104
1398-08	0.000920493	0.000899831	0.000986209	0.000798089	0.000718451	0.000785965	0.00298708	0.0030418	0.00115664	0.00151456
1398-09	0.000918065	0.000904168	0.00101888	0.000815539	0.000742625	0.000820697	0.00289522	0.00292142	0.00107634	0.00138343
1398-10	0.000950732	0.000917014	0.00105889	0.00092807	0.000877491	0.000961493	0.00286148	0.00286766	0.000918636	0.000966988
1398-11	0.00097891	0.000965319	0.00109191	0.00107007	0.00106992	0.00112973	0.002892	0.00306346	0.000694179	0.000625165
1398-12	0.000996088	0.00101178	0.00112733	0.00117454	0.00121709	0.0012887	0.00293896	0.00348478	0.000741614	0.000587206
1399-01	0.00102038	0.00106937	0.00113835	0.00125473	0.00139484	0.00137404	0.00294467	0.00375934	0.000901287	0.000640165
1399-02	0.00103272	0.00108735	0.00111411	0.00126166	0.00144864	0.00138829	0.0029009	0.00378287	0.000872196	0.000631271
1399-03	0.00103876	0.00104911	0.00110273	0.00123352	0.00136803	0.00136983	0.00293048	0.00388058	0.000960507	0.000786899
1399-04	0.00103535	0.00104462	0.00107712	0.00115071	0.00130045	0.00124905	0.00313937	0.0043891	0.00103967	0.00104878
1399-05	0.00100427	0.00101217	0.00106888	0.000990766	0.00113587	0.00112497	0.00324459	0.00440208	0.00110888	0.0011234
1399-06	0.00101013	0.00101184	0.001075	0.000860876	0.000971905	0.00102426	0.00326609	0.00417628	0.00101414	0.00128544
1399-07	0.00102937	0.00100434	0.00112618	0.000810399	0.000881341	0.000969526	0.00314273	0.00368632	0.000936791	0.00117369
1399-08	0.00105276	0.00101004	0.00115887	0.000815726	0.000870979	0.000964288	0.00307134	0.00340494	0.00115915	0.0014634
1399-09	0.0010757	0.00103099	0.0011897	0.000841399	0.000915193	0.00100485	0.0029923	0.00335857	0.00101826	0.00128691
1399-10	0.00109599	0.00106555	0.00121129	0.000952673	0.00102744	0.00111287	0.00292575	0.00344805	0.000859434	0.00091605
1399-11	0.00111268	0.00110799	0.00123788	0.00112842	0.0012257	0.00126842	0.00286721	0.00341588	0.000787147	0.000747688
1399-12	0.00114118	0.00115743	0.00127593	0.00131884	0.00143715	0.00145301	0.00290824	0.00366348	0.000745406	0.000525304
1400-01	0.00115603	0.0011479	0.00130063	0.00142046	0.00151814	0.00162356	0.00291202	0.00378749	0.000740791	0.000469201
1400-02	0.00117154	0.00113152	0.00129751	0.00145821	0.00149529	0.0016484	0.00290452	0.00393826	0.000812208	0.000545807
1400-03	0.00118554	0.00110928	0.00126934	0.00147959	0.00140295	0.00156848	0.00295567	0.00415463	0.00102314	0.000832528
1400-04	0.00118889	0.00108922	0.00122479	0.00144088	0.00129682	0.00142659	0.00311008	0.0045203	0.000973075	0.000841472
1400-05	0.00115448	0.00107408	0.001198	0.00124003	0.00114668	0.0012521	0.00325215	0.00474658	0.000963105	0.00109196
1400-06	0.00117282	0.00109374	0.00119875	0.00112131	0.00100259	0.00110141	0.00313205	0.00395481	0.000955181	0.00131749
1400-07	0.00119025	0.00112763	0.00120486	0.00107282	0.000986605	0.00105047	0.00309042	0.00363356	0.000984709	0.00111519
1400-08	0.00116595	0.00113882	0.00120651	0.000998705	0.000999219	0.0010554	0.00291215	0.00314327	0.00112466	0.00132844
1400-09	0.00115764	0.00116404	0.00121545	0.000993095	0.00106798	0.00110568	0.00283997	0.00300307	0.00105333	0.00125655
1400-10	0.00116533	0.00120594	0.00121639	0.00107697	0.00122591	0.00121036	0.00284988	0.00296505	0.000901333	0.000933147
1400-11	0.00118728	0.00120884	0.00124098	0.00125565	0.00137086	0.00136857	0.00295361	0.0031559	0.000814987	0.000594737
1400-12	0.00123074	0.00125482	0.00125693	0.00144573	0.00158097	0.00154064	0.00308503	0.00359176	0.000729936	0.000539335
1401-01	0.00125573	0.00127909	0.00124196	0.0015612	0.00170421	0.00162169	0.00310507	0.0039091	0.00077995	0.000513534
1401-02	0.0012375	0.0012476	0.00127658	0.00157457	0.00166232	0.00171277	0.00310489	0.00406445	0.000891615	0.000684244
1401-03	0.00117554	0.00127213	0.00127203	0.00147147	0.00164807	0.00167951	0.00312893	0.00412244	0.00102433	0.000826686
1401-04	0.00114266	0.00127971	0.00125217	0.00138405	0.00159304	0.00159896	0.00323168	0.00436156	0.00101465	0.000853013
1401-05	0.00114763	0.00122903	0.00121287	0.00127508	0.00137843	0.00142448	0.00337192	0.00441499	0.000996516	0.00112654
1401-06	0.00115799	0.00124853	0.00122926	0.00116022	0.00122829	0.00129531	0.00335592	0.00392775	0.000956305	0.00121273
1401-07	0.00118166	0.00125347	0.00125054	0.00111549	0.00115437	0.00121682	0.00329292	0.00370973	0.00111397	0.0013026
1401-08	0.00117674	0.00125678	0.00125152	0.00106149	0.00114605	0.00118683	0.00317596	0.00344629	0.00111188	0.00142015
1401-09	0.00118517	0.00128242	0.0012728	0.0010915	0.00119216	0.00120541	0.00309446	0.00327905	0.000997871	0.00121395
1401-10	0.0011961	0.0012954	0.00130961	0.00117938	0.00127923	0.00130893	0.00305697	0.0032756	0.000748598	0.000714209
1401-11	0.00120239	0.00132076	0.00133724	0.00130945	0.00139379	0.00144064	0.00307613	0.00336855	0.000770174	0.000589667
1401-12	0.00123598	0.00135881	0.00139664	0.00146782	0.0015908	0.00166397	0.00308841	0.00356513	0.000712337	0.000502574
1402-01	0.00126926	0.00139876	0.00139932	0.0015894	0.00175972	0.00177909	0.00308639	0.0038109	0.000857361	0.000599496
1402-02	0.00127037	0.00142698	0.00137969	0.001558	0.00184554	0.00177364	0.00306588	0.003917	0.000859852	0.000723596
1402-03	0.00124473	0.00142352	0.00140479	0.00147786	0.00179058	0.00177746	0.00308892	0.00405777	0.000929108	0.000851983
1402-04	0.00123661	0.00139987	0.00140084	0.00137667	0.0016403	0.00167732	0.00315529	0.00417362	0.000970935	0.0011267
1402-05	0.00122447	0.00137976	0.00138498	0.00121533	0.00146542	0.00151523	0.00320215	0.00408639	0.00106744	0.00132707
1402-06	0.00126498	0.0013977	0.00139242	0.00112022	0.0013428	0.00134786	0.00327796	0.00412302	0.00097749	0.00134096
1402-07	0.00128802	0.00142231	0.0014179	0.00108629	0.00128965	0.00126903	0.00314624	0.00353835	0.00109474	0.00131461
1402-08	0.00130297	0.00142875	0.00144086	0.00112454	0.00131461	0.00124795	0.00305725	0.00323177	0.00118699	0.00147289
1402-09	0.0013314	0.00142441	0.00145943	0.0012066	0.00137988	0.00128745	0.00298635	0.00317027	0.000949661	0.00114766
1402-10	0.00133995	0.00140172	0.00147494	0.00134201	0.00146748	0.00139578	0.00296068	0.003262	0.000789245	0.000876005
1402-11	0.00138269	0.00139801	0.00147269	0.00150227	0.00157725	0.00155696	0.00291144	0.00334372	0.00070826	0.000571623
1402-12	0.00141785	0.00142138	0.0014927	0.00164552	0.00174112	0.00173406	0.00290495	0.00356646	0.000671715	0.00050519
1403-01	0.00142159	0.00148296	0.00150963	0.00174086	0.00196329	0.00190941	0.00288408	0.00386391	0.000737547	0.00055878
1403-02	0.00144044	0.00146736	0.00146699	0.00180969	0.00196447	0.00190228	0.00286447	0.00406453	0.000821379	0.000555208
1403-03	0.00143022	0.00142514	0.00137504	0.00175882	0.00186142	0.0017492	0.0029259	0.00431943	0.000945734	0.000777457
1403-04	0.00140577	0.00138732	0.00131816	0.00165876	0.00170583	0.00160132	0.00296409	0.00432182	0.00103578	0.00095954
1403-05	0.00137899	0.00133751	0.00128922	0.00149041	0.00146273	0.00141234	0.00311259	0.00456621	0.00101499	0.00121732
1403-06	0.00138995	0.00131622	0.00130901	0.0013522	0.00127718	0.00128981	0.00314778	0.00429117	0.00092381	0.00111126
1403-07	0.00137528	0.00131158	0.00131648	0.00125479	0.00119423	0.00118276	0.00310368	0.0038353	0.00103446	0.00126151
1403-08	0.00137932	0.00131147	0.00130642	0.00123347	0.00116894	0.0011479	0.00290612	0.00333335	0.00107818	0.0012057
1403-09	0.00141079	0.00133412	0.00131878	0.00130173	0.00126177	0.00116292	0.00278325	0.00315496	0.00100788	0.00129972
1403-10	0.00142957	0.0013379	0.00136457	0.00143292	0.00139388	0.00129021	0.00275077	0.0031195	0.000791961	0.000827617
1403-11	0.00142027	0.00134572	0.0013805	0.00156979	0.00154827	0.00144886	0.00276623	0.00322571	0.000733521	0.000700136
1403-12	0.00143807	0.00134314	0.00140371	0.00177115	0.00171507	0.00166688	0.00279354	0.00340681	0.000736129	0.000586916
1404-01	0.00143484	0.00136167	0.00139959	0.00187883	0.00184704	0.00178316	0.00282271	0.00355733	0.000772479	0.000583638
1404-02	0.00142187	0.00135234	0.00138816	0.00187174	0.00178905	0.00181038	0.0028407	0.0036217	0.000859777	0.000751469
1404-03	0.00141348	0.00132077	0.00132473	0.00183699	0.0016684	0.00167659	0.00287619	0.00362859	0.00095645	0.000876918
1404-04	0.0013761	0.00132563	0.0012833	0.00166754	0.00152325	0.00151564	0.00299771	0.00388064	0.00099431	0.00080905
1404-05	0.00133018	0.00131852	0.00127715	0.0014468	0.00131176	0.00134412	0.00311518	0.00392503	0.000991183	0.000985495
1404-06	0.00133369	0.00133032	0.0013037	0.00127992	0.00114082	0.00119566	0.00312119	0.00361065	0.000937064	0.0012622
1404-07	0.00135524	0.00135602	0.00132924	0.00123493	0.00108796	0.00112032	0.00306858	0.00326782	0.000928375	0.00115289
1404-08	0.00139024	0.00136205	0.00134251	0.00126034	0.00106933	0.00111407	0.00293953	0.00298331	0.00110461	0.00138122
1404-09	0.00136973	0.00137129	0.00138145	0.00127348	0.00111261	0.00121102	0.00285725	0.00290979	0.00102354	0.00128499
1404-10	0.00136626	0.00139313	0.00139832	0.00137532	0.00121376	0.00138138	0.0028664	0.00289216	0.000859715	0.000878497
1404-11	0.00134613	0.00140264	0.00141184	0.00150604	0.00134182	0.0015634	0.0028832	0.00308205	0.000747322	0.000674488
1404-12	0.00134106	0.00141925	0.00141082	0.00162318	0.00150445	0.00172453	0.00286639	0.00325224	0.000740401	0.000576446
1405-01	0.00133375	0.00140067	0.00142985	0.00169815	0.00161825	0.00187539	0.00293086	0.00360429	0.000805479	0.000532239
1405-02	0.00133681	0.00136673	0.00145014	0.00173407	0.00163365	0.00193404	0.00291394	0.00385629	0.000905956	0.000712343
1405-03	0.00133341	0.00130568	0.0014048	0.00167848	0.00154639	0.00175909	0.00288873	0.00387325	0.00102536	0.000785393
1405-04	0.00133172	0.00126534	0.00136408	0.00155644	0.00142657	0.00160696	0.00297884	0.00402829	0.00111539	0.00119523
1405-05	0.00131801	0.00124476	0.00133509	0.00137032	0.00126838	0.00142707	0.00304761	0.00397808	0.000828571	0.000926777
1405-06	0.00135162	0.00128456	0.00132039	0.00124624	0.00116849	0.00124097	0.00313562	0.00379174	0.000869707	0.00115692
1405-07	0.00137589	0.00132469	0.00131959	0.00113796	0.0011346	0.00113418	0.00306233	0.00337621	0.00106183	0.00120001
1405-08	0.00139164	0.0013435	0.00131184	0.00111005	0.00115117	0.00110642	0.00295147	0.00315599	0.00122586	0.00141683
1405-09	0.00140587	0.00135978	0.00131927	0.00112551	0.00119508	0.00116324	0.00286407	0.00303721	0.0011574	0.00143118
1405-10	0.00142782	0.00135167	0.0013278	0.00125102	0.00128143	0.00125772	0.00281937	0.00306964	0.000896291	0.000978966
1405-11	0.00143809	0.0013874	0.00134668	0.00142534	0.00144854	0.0014054	0.00283592	0.00323595	0.000837384	0.000897959
1405-12	0.00145257	0.00143044	0.00137357	0.00160507	0.00163793	0.00155798	0.00287513	0.00352664	0.000734574	0.000495687
1406-01	0.0014464	0.00146227	0.00138081	0.0017318	0.00179488	0.00167285	0.00290217	0.00384106	0.000772352	0.000500375
1406-02	0.00143975	0.00142524	0.00137828	0.00178978	0.00179658	0.00173915	0.00290088	0.00397588	0.000915853	0.000675678
1406-03	0.0013924	0.00138594	0.00135303	0.00173139	0.00173192	0.0016864	0.00297234	0.00414835	0.000985841	0.000850222
1406-04	0.00134024	0.00134681	0.00131469	0.00162132	0.00159113	0.00157857	0.00309637	0.0044093	0.000984094	0.000952314
1406-05	0.00132165	0.00132972	0.00126636	0.00153449	0.00142495	0.00139734	0.00312092	0.00429056	0.000944149	0.00114405
1406-06	0.00131934	0.00134797	0.00122823	0.00138736	0.00131708	0.00119026	0.00314909	0.00400555	0.0009491	0.00125247
1406-07	0.00132186	0.00136961	0.00123108	0.00129117	0.0012261	0.00111356	0.00309094	0.00348868	0.00104788	0.00136419
1406-08	0.00130248	0.00137503	0.00123258	0.00124704	0.00118503	0.00109461	0.00293085	0.00317559	0.00117889	0.00137132
1406-09	0.00128838	0.00135256	0.0012244	0.00129701	0.00117063	0.00109158	0.00285177	0.00307089	0.00109746	0.00127001
1406-10	0.00133011	0.00135186	0.00122642	0.00141913	0.00129845	0.00117216	0.00277757	0.00308312	0.00095126	0.00107075
1406-11	0.00135907	0.0013809	0.00123136	0.00157175	0.00148587	0.00131891	0.00279638	0.00319693	0.000693199	0.000507612
1406-12	0.00136996	0.00141628	0.00125266	0.00176271	0.00170246	0.00148198	0.00281801	0.00335359	0.000742309	0.000566651
1407-01	0.00138086	0.00146379	0.00122438	0.00190968	0.00189699	0.00151292	0.0028285	0.00357024	0.000737003	0.000476346
1407-02	0.00132943	0.00148636	0.00119055	0.00183101	0.00196058	0.00151643	0.00286756	0.00383846	0.000931681	0.00070331
1407-03	0.00128442	0.00148169	0.00115572	0.00177087	0.00190397	0.00144673	0.00283901	0.003972	0.000909615	0.000877451
1407-04	0.00124248	0.00146173	0.00114093	0.00164878	0.0017569	0.00133783	0.00293992	0.00418909	0.00104496	0.000895108
1407-05	0.00121495	0.00140652	0.00112312	0.00144106	0.00147798	0.00115333	0.00308398	0.00430669	0.000911406	0.000955364
1407-06	0.00122753	0.00138694	0.00116749	0.00125784	0.00127483	0.00106885	0.00312398	0.00410551	0.000926971	0.00124247
1407-07	0.0012289	0.0014041	0.00119843	0.00114382	0.00119526	0.00100624	0.0029664	0.00345147	0.00108181	0.00139844
1407-08	0.00121975	0.00140328	0.00117348	0.00115016	0.00117465	0.00100996	0.00288902	0.00316831	0.00118405	0.00146586
1407-09	0.00124029	0.00137129	0.00115995	0.00120688	0.00117006	0.00106775	0.00281495	0.0030419	0.00100751	0.00113263
1407-10	0.00125309	0.00131058	0.00120529	0.00131202	0.00121845	0.00123183	0.0027568	0.00295452	0.000824735	0.000975088
1407-11	0.00125159	0.00130627	0.00124099	0.00143761	0.00135198	0.00137689	0.00281137	0.0031185	0.00073939	0.000627742
1407-12	0.00125188	0.00131999	0.00126151	0.00161303	0.00149048	0.00153808	0.00286568	0.0034243	0.000739836	0.000498482
1408-01	0.00129564	0.00131445	0.00123879	0.00176672	0.00155802	0.0016571	0.00296324	0.00386397	0.000734936	0.000490937
1408-02	0.0012993	0.00132938	0.00123565	0.00175601	0.00158993	0.00171367	0.00298149	0.00399756	0.000873533	0.000610429
1408-03	0.00130952	0.00132613	0.00124616	0.00170844	0.00152591	0.00165679	0.00304554	0.00408223	0.00104032	0.000799048
1408-04	0.00132221	0.00132169	0.00125169	0.00161133	0.00143973	0.00148814	0.00325439	0.00443045	0.00100611	0.00086804
1408-05	0.0013171	0.00129798	0.00124286	0.00140704	0.00128594	0.00126407	0.00338719	0.00449611	0.00101665	0.00117971
1408-06	0.00131513	0.00129017	0.00124476	0.00119916	0.00116442	0.00109473	0.00339222	0.00413031	0.000989913	0.0012129
1408-07	0.0013234	0.00129151	0.00122958	0.00111373	0.00110336	0.000994545	0.00329157	0.0037255	0.00109229	0.00137145
1408-08	0.00132311	0.00128547	0.00124605	0.00108332	0.00105564	0.000962553	0.00318115	0.00344612	0.00120597	0.00149549
1408-09	0.00135186	0.00126351	0.00126251	0.00115421	0.00107103	0.00102016	0.00302713	0.00325475	0.00119059	0.00148829
1408-10	0.00137033	0.00127321	0.00127224	0.00127228	0.00116577	0.00111396	0.00301263	0.0033353	0.000888729	0.000856496
1408-11	0.0013663	0.00129448	0.00126799	0.00140888	0.00131889	0.00125216	0.00302841	0.00348962	0.000714154	0.000632445
1408-12	0.00138583	0.00133839	0.00129343	0.00159801	0.00154531	0.00143224	0.00308558	0.00383804	0.00071909	0.000556872
1409-01	0.00141507	0.0013114	0.00131341	0.00175079	0.00160462	0.00159738	0.00307899	0.00405713	0.000826214	0.000586417
1409-02	0.00139796	0.00129567	0.00129211	0.00176412	0.00164121	0.0016118	0.00306172	0.00411587	0.000792714	0.000581307
1409-03	0.00137439	0.00127871	0.00128309	0.00166443	0.00162853	0.00160718	0.00309882	0.00426815	0.000930549	0.000815729
1409-04	0.00133723	0.00125796	0.00122367	0.00151241	0.00153629	0.0014486	0.00321602	0.0044843	0.00103054	0.00085994
1409-05	0.00130988	0.00121236	0.00118618	0.00130236	0.00131593	0.00129019	0.00338563	0.00489911	0.00097282	0.001108
1409-06	0.00130971	0.0012103	0.00117985	0.00114496	0.00115696	0.00113759	0.00332857	0.00428853	0.000998013	0.0012758
1409-07	0.00131171	0.00124266	0.00119031	0.00106896	0.00111469	0.00108321	0.00317195	0.00367388	0.00104499	0.00122541
1409-08	0.00128333	0.0012316	0.00117449	0.00102149	0.00111089	0.00103515	0.00299322	0.00334783	0.0011103	0.00122199
1409-09	0.00129636	0.00124136	0.00118896	0.00106151	0.00116785	0.00106064	0.00287663	0.00313449	0.00120456	0.00147502
1409-10	0.00128379	0.00124683	0.00121026	0.00117385	0.00125182	0.00117533	0.00278121	0.00305583	0.000951583	0.00112282
1409-11	0.00126017	0.00122716	0.00125413	0.00127443	0.00134085	0.00134409	0.0027605	0.00318756	0.000701379	0.000595872
1409-12	0.0012898	0.00122482	0.00126387	0.0014635	0.00146356	0.00150568	0.00277974	0.00336997	0.00069035	0.000457771
1410-01	0.00134031	0.00122193	0.00125343	0.00169184	0.00153143	0.00161554	0.00278961	0.00352716	0.000852878	0.000605675
1410-02	0.00135451	0.00119582	0.00125088	0.00174184	0.00149207	0.00169104	0.00279372	0.00367663	0.000983246	0.000715452
1410-03	0.00134105	0.00116792	0.00123714	0.00168959	0.00139773	0.00165971	0.00279022	0.0037962	0.000947597	0.000735153
1410-04	0.00132387	0.00117901	0.00125492	0.00158195	0.0013084	0.00162994	0.00283621	0.00396395	0.00105244	0.000961837
1410-05	0.00131516	0.00116966	0.00119763	0.00148915	0.00113594	0.00140818	0.00290542	0.00400594	0.00100891	0.0011874
1410-06	0.00132771	0.00119352	0.00120534	0.00137588	0.00101024	0.00123843	0.00302649	0.00389578	0.00107336	0.00135224
1410-07	0.00133753	0.00123512	0.00121017	0.00126225	0.000932049	0.00115864	0.00296234	0.00340561	0.00120161	0.00164286
1410-08	0.00132232	0.00124862	0.00119985	0.00118963	0.000892105	0.00109599	0.00283164	0.00303009	0.00114754	0.00149142
1410-09	0.00132943	0.00128651	0.00120808	0.00119478	0.000963651	0.00108244	0.00275791	0.00284106	0.00109865	0.00138515
1410-10	0.00135623	0.00132455	0.00120313	0.00130115	0.00110771	0.00115527	0.00272973	0.00287118	0.000957354	0.00106923
1410-11	0.00138179	0.0013469	0.00123157	0.00145243	0.0012581	0.00133985	0.00276454	0.00306904	0.000790355	0.000810403
1410-12	0.00140867	0.00138932	0.00129771	0.00168955	0.00145491	0.00157021	0.00280288	0.00334535	0.000679797	0.00054179
1411-01	0.00141518	0.00141748	0.00132467	0.00185201	0.00162438	0.00170403	0.00284417	0.0037513	0.000786399	0.000581472
1411-02	0.00139652	0.00138047	0.00129105	0.00187766	0.00161044	0.00166452	0.0028948	0.00389393	0.000977003	0.000696933
1411-03	0.00138348	0.00133659	0.00127233	0.00181611	0.00153128	0.00160054	0.00297951	0.00406816	0.000953899	0.000803389
1411-04	0.00135484	0.0013115	0.00127093	0.0016697	0.0014378	0.0014858	0.00307856	0.00413554	0.00097309	0.000888143
1411-05	0.00132109	0.00128834	0.00125645	0.00142171	0.00129538	0.00130603	0.00319668	0.00420791	0.000987851	0.00105036
1411-06	0.0013498	0.00132789	0.00128437	0.0012517	0.00117332	0.00115621	0.00319919	0.00383778	0.00104504	0.00135022
1411-07	0.00140795	0.00135118	0.00131241	0.00117148	0.00112109	0.00110047	0.00310862	0.00340261	0.00108422	0.00131674
1411-08	0.00143004	0.00136315	0.00131681	0.0011517	0.00111333	0.00110027	0.00302534	0.00327001	0.00112644	0.00139694
1411-09	0.00143052	0.00136431	0.0013335	0.00121764	0.001141	0.00114126	0.00291546	0.00309685	0.00113446	0.00142285
1411-10	0.00142886	0.00137472	0.00137035	0.00133768	0.00124506	0.00123815	0.00289796	0.00308	0.000897184	0.000878791
1411-11	0.0014416	0.00138527	0.00139856	0.00151675	0.00138145	0.00140902	0.00291553	0.00317171	0.000727675	0.00055758
1411-12	0.00145953	0.00139186	0.00143479	0.00170174	0.00156573	0.00159275	0.00294841	0.00344949	0.000740976	0.000515487
1412-01	0.00149489	0.00140271	0.00144058	0.00186921	0.00168833	0.001747	0.00294508	0.00367269	0.000788094	0.000472343
1412-02	0.00147659	0.00141958	0.00141664	0.00187026	0.00181213	0.00177492	0.00287311	0.0036405	0.000833051	0.000594911
1412-03	0.00146268	0.00137209	0.00138115	0.0018658	0.00174749	0.00168843	0.00291034	0.00381137	0.000979534	0.000794289
1412-04	0.00143653	0.00132666	0.00134743	0.00173547	0.00163692	0.00157119	0.00302826	0.00401752	0.000991992	0.000894069
1412-05	0.00138301	0.00128382	0.00129439	0.00151212	0.00142675	0.00136255	0.00324582	0.0044401	0.000990474	0.00109336
1412-06	0.00139885	0.00129392	0.00131542	0.00136347	0.00124726	0.00123089	0.00327789	0.00431663	0.0010728	0.00142891
1412-07	0.00140154	0.0013039	0.00132805	0.00124926	0.00118413	0.00116074	0.00313011	0.00367222	0.00106673	0.00133019
1412-08	0.00136255	0.00131387	0.00134	0.00116965	0.00120583	0.00113225	0.00295079	0.00316777	0.00112658	0.00135778
1412-09	0.00135432	0.00130244	0.00132641	0.00118754	0.00124478	0.00118032	0.00282887	0.00304616	0.00112361	0.00151536
1412-10	0.0013581	0.00131944	0.00134323	0.00129775	0.00134409	0.00130721	0.00275585	0.00297421	0.000878592	0.000927002
1412-11	0.00136917	0.00132147	0.00134785	0.0014722	0.00149819	0.00145803	0.00273668	0.00316659	0.000850549	0.000673075
1412-12	0.00136402	0.00133355	0.00136782	0.00165331	0.0016542	0.00166219	0.00278195	0.00348989	0.000697763	0.000519866
1413-01	0.00131686	0.00136405	0.001379	0.00168613	0.00183616	0.00183708	0.00276807	0.00366307	0.000782417	0.000585221
1413-02	0.0013182	0.0013582	0.00137307	0.00167626	0.00179777	0.00187858	0.00278995	0.00386802	0.000845701	0.000545299
1413-03	0.0012821	0.00136144	0.00136409	0.00159943	0.00170901	0.00180866	0.00278635	0.00392205	0.000934659	0.000744425
1413-04	0.00124262	0.00133928	0.00136837	0.00147367	0.00150168	0.00170734	0.00282919	0.00401061	0.000934159	0.000940386
1413-05	0.00125434	0.00133346	0.00136433	0.00136631	0.00134902	0.00156229	0.00291026	0.0040223	0.000836523	0.000930233
1413-06	0.00128175	0.00136212	0.00136582	0.00123393	0.00122625	0.0013528	0.00301012	0.00385672	0.000914612	0.00115728
1413-07	0.00131091	0.00139219	0.0013681	0.00114653	0.00115356	0.00118256	0.00288791	0.00332332	0.00105712	0.00155884
1413-08	0.00132496	0.00139449	0.00135932	0.00112104	0.0011222	0.00111864	0.00279963	0.0030202	0.00101202	0.0011944
1413-09	0.00134539	0.00139562	0.00138094	0.00118735	0.00112783	0.00116769	0.00271044	0.00289028	0.00114389	0.00147568
1413-10	0.00137207	0.0013688	0.00139959	0.00137029	0.00120292	0.00132719	0.00268351	0.00291805	0.000932442	0.00100294
1413-11	0.00139087	0.00136236	0.00142828	0.00153022	0.0013337	0.00154293	0.00273021	0.00297598	0.0007009	0.000587925
1413-12	0.00139924	0.00136796	0.00149752	0.00169386	0.00152109	0.0017948	0.00274213	0.00319839	0.000790794	0.00061049
1414-01	0.00142385	0.00137668	0.00153336	0.00187019	0.00164585	0.00191633	0.00280017	0.00352431	0.0108412	0.00228838
1414-02	0.00136722	0.00137206	0.001511	0.00177225	0.00163728	0.00187384	0.00284935	0.00382341	0.018221	0.00575764
1414-03	0.00133527	0.00133347	0.00149785	0.00163383	0.00152063	0.00183105	0.00291528	0.00401127	0.0195993	0.00929683
1414-04	0.00956084	0.00965086	0.0100245	0.00264482	0.00299623	0.00188101	0.00948235	0.00510155	0.0192407	0.0113013
1414-05	0.0363599	0.0393123	0.0390214	0.0113648	0.014324	0.00462118	0.0290659	0.0110582	0.018268	0.0110719
1414-06	0.0454961	0.0507896	0.0485006	0.0188296	0.0203405	0.00888507	0.0401206	0.0171765	0.0174645	0.0107803
1414-07	0.0464068	0.0523158	0.0507649	0.021808	0.02218	0.0110327	0.0445642	0.0184468	0.016708	0.0102096
1414-08	0.0450688	0.0520852	0.0494716	0.0213164	0.0224859	0.0115347	0.0461922	0.0181242	0.0158337	0.00946828
1414-09	0.041561	0.0514289	0.0482395	0.0198114	0.023288	0.0123448	0.0464564	0.0181988	0.0148919	0.00908451
1414-10	0.0398705	0.0504961	0.0467628	0.0217284	0.0268219	0.0143614	0.0459843	0.0198576	0.0137586	0.00902998
1414-11	0.0394269	0.0486527	0.0440852	0.0233583	0.0308764	0.0178112	0.0453364	0.0248008	0.0127422	0.00933112
1414-12	0.0372218	0.0453627	0.0412928	0.0238065	0.0342015	0.0188023	0.0440995	0.0300696	0.0120085	0.0101227
1415-01	0.0351597	0.0423351	0.0389453	0.0247571	0.0383349	0.0216275	0.042457	0.0361881	0.0111318	0.0106932
1415-02	0.032247	0.0401453	0.0367959	0.0238328	0.0401535	0.0234195	0.0408687	0.0417914	0.0104339	0.0106591
1415-03	0.0297871	0.0379513	0.0348148	0.0228856	0.0391269	0.0234377	0.0395965	0.0449038	0.00969694	0.0103398
1415-04	0.0266586	0.0364061	0.0330168	0.0198317	0.0367263	0.0216786	0.0386121	0.0445582	0.00895117	0.00952428
1415-05	0.0245275	0.0340833	0.031466	0.0177207	0.0323068	0.02064	0.0376693	0.0421803	0.00812259	0.00867682
1415-06	0.0226632	0.0316855	0.0295144	0.0161446	0.0276003	0.0189174	0.0367262	0.0382012	0.00747239	0.00785105
1415-07	0.0206446	0.0294391	0.0269918	0.0144495	0.0241433	0.0169329	0.0352727	0.0339928	0.00685256	0.00686479
1415-08	0.018422	0.0276709	0.0245433	0.0125914	0.0223487	0.0154732	0.0335202	0.0313694	0.00663877	0.00625548
1415-09	0.0171059	0.026515	0.0225825	0.0120474	0.022021	0.0149339	0.0321403	0.0304924	0.00570275	0.00562148
1415-10	0.0162305	0.0254762	0.0210846	0.0123036	0.0228637	0.0152882	0.0305922	0.0309075	0.0046791	0.00490291
1415-11	0.0152642	0.0246909	0.0199187	0.0125133	0.0243545	0.0161694	0.0290022	0.0316108	0.00401362	0.00435419
1415-12	0.0142267	0.0236261	0.0186633	0.0127282	0.0257594	0.0172798	0.0276374	0.0320182	0.00353189	0.00400424
1416-01	0.0130131	0.0215715	0.0172843	0.0125377	0.0245825	0.0181249	0.0260112	0.0317058	0.00315833	0.00340263
1416-02	0.0120074	0.0196936	0.0159215	0.011504	0.0227149	0.0172213	0.0242895	0.0311251	0.00279354	0.00285918
1416-03	0.0110586	0.018294	0.0147029	0.0104967	0.0204803	0.0154451	0.022379	0.0288136	0.00254156	0.00253663
1416-04	0.0101953	0.0172178	0.0139083	0.00911125	0.0181175	0.0142152	0.020642	0.0262174	0.00218075	0.0022443
1416-05	0.00931991	0.0161096	0.0132638	0.00784443	0.0158074	0.0128202	0.0193728	0.023346	0.0019423	0.00205925
1416-06	0.00861561	0.0151661	0.0125055	0.0066795	0.0136854	0.0112228	0.0181419	0.01952	0.00177627	0.00205616
1416-07	0.00800157	0.0143589	0.0117015	0.00576308	0.0121126	0.00979416	0.0166621	0.0157033	0.00181543	0.00208459
[truncated: 5,201 more rows]

## Sheet: Global annual mean TAS (Kelvin)
Year	UKESM1 r1	UKESM1 r2	UKESM1 r3	CESM2(WACCM6ma)	MPI-ESM1-2-LR r1	MPI-ESM1-2-LR r2	MRI-ESM2	MIROC-ES2L	IPSL-CM6A-LR
1250	286.983	286.834	286.916	287.626	286.358	286.382	287.321	288.253	285.658
1251	286.994	286.885	286.667	287.538	286.369	286.52	287.285	288.371	285.849
1252	286.868	286.889	287.031	287.591	286.553	286.496	287.463	288.348	285.983
1253	286.903	287.046	287.154	287.714	286.558	286.474	287.594	288.058	285.97
1254	286.98	286.933	287.1	287.575	286.428	286.526	287.424	288.003	285.98
1255	286.925	286.921	287.112	287.602	286.57	286.618	287.303	288.175	285.738
1256	286.975	286.906	287.088	287.682	286.743	286.583	287.314	288.324	285.782
1257	286.853	286.741	286.788	287.407	286.395	286.417	287.039	288.209	285.983
1258	285.865	285.807	285.98	285.573	285.274	285.217	285.875	287.084	285.248
1259	286.305	286.103	286.245	285.292	285.176	285.211	285.886	286.966	284.872
1260	286.408	286.367	286.57	285.712	285.716	285.645	286.24	287.246	285.083
1261	286.49	286.607	286.722	286.385	285.887	285.838	286.654	287.513	285.222
1262	286.709	286.462	286.652	286.854	285.851	286.005	286.828	287.639	285.368
1263	286.805	286.558	286.635	286.859	286.089	286.179	287.037	287.751	285.51
1264	286.824	286.516	286.716	286.935	286.323	286.466	287.048	287.839	285.592
1265	286.837	286.587	286.788	287.316	286.313	286.3	287.003	288.014	285.581
1266	286.691	286.775	286.688	287.327	286.286	286.118	287.107	288.036	285.571
1267	286.784	286.873	286.762	287.099	286.212	286.308	287.157	288.001	285.615
1268	286.829	286.717	286.924	287.105	286.241	286.536	287.08	287.995	285.679
1269	286.856	286.595	286.997	287.431	286.246	286.358	287.167	287.967	285.781
1270	286.798	286.67	286.829	287.454	286.43	286.199	286.997	288.061	285.542
1271	286.626	286.617	286.783	287.256	286.345	286.391	287.045	287.827	285.627
1272	286.702	286.662	286.73	287.565	286.416	286.593	287.044	287.931	285.786
1273	286.609	286.846	286.636	287.599	286.314	286.576	287.132	288.055	285.684
1274	286.787	287.077	286.756	287.357	286.189	286.535	287.223	288.073	285.709
1275	286.792	287.043	287.08	287.468	286.145	286.507	287.152	288.083	285.682
1276	286.448	286.798	286.625	287.55	286.18	286.349	286.994	287.89	285.491
1277	286.25	286.54	286.474	287.11	286.1	286.292	286.93	287.726	285.466
1278	286.521	286.599	286.448	287.007	286.264	286.335	286.934	287.739	285.639
1279	286.713	286.682	286.585	287.215	286.328	286.287	287.211	287.775	285.767
1280	286.749	286.796	286.643	287.508	286.459	286.298	287.336	287.899	285.711
1281	286.708	286.863	286.772	287.521	286.499	286.41	287.168	287.843	285.679
1282	286.714	286.928	286.715	287.512	286.426	286.557	287.195	288.053	285.732
1283	286.649	287.07	286.865	287.569	286.39	286.456	287.308	288.298	285.915
1284	286.661	286.987	287.055	287.586	286.326	286.398	287.147	288.234	285.654
1285	286.812	286.868	286.968	287.466	286.327	286.501	287.408	287.913	285.739
1286	286.282	286.495	286.324	287.114	285.982	286.083	287.03	287.394	285.443
1287	286.338	286.703	286.338	286.928	286.067	285.935	286.812	287.442	285.081
1288	286.38	286.716	286.5	287.204	286.278	286.052	286.799	287.734	285.179
1289	286.435	286.809	286.449	287.203	286.414	286.113	287.057	287.89	285.409
1290	286.487	286.909	286.446	287.241	286.592	286.19	287.167	287.943	285.345
1291	286.551	286.947	286.314	287.533	286.67	286.206	287.06	287.952	285.518
1292	286.815	286.939	286.484	287.595	286.643	286.33	287.149	287.962	285.473
1293	286.698	286.622	286.684	287.36	286.495	286.394	287.346	288.174	285.756
1294	286.647	286.658	286.766	287.45	286.266	286.274	287.294	288.034	285.832
1295	286.835	286.751	286.732	287.552	286.373	286.279	287.114	288.157	285.869
1296	286.847	286.801	286.941	287.567	286.536	286.467	287.148	288.113	285.745
1297	286.571	286.978	286.894	287.697	286.759	286.428	287.229	288.215	285.598
1298	286.526	287.153	286.994	287.699	286.689	286.537	287.161	288.411	285.514
1299	286.71	287.073	286.88	287.573	286.317	286.559	287.319	288.133	285.493
1300	286.861	287.034	286.872	287.444	286.18	286.479	287.301	288.054	285.578
1301	286.966	287.087	286.873	287.638	286.536	286.424	287.099	288.037	285.714
1302	286.77	287.042	287.051	287.751	286.708	286.431	287.288	288.042	285.687
1303	286.885	286.878	287.022	287.595	286.605	286.507	287.426	288.164	285.832
1304	286.994	287.05	286.93	287.58	286.238	286.443	287.147	288.383	285.979
1305	286.965	287.012	286.916	287.503	286.182	286.383	287.234	288.261	285.989
1306	286.886	286.946	286.771	287.381	286.381	286.46	287.461	288.104	285.809
1307	286.855	286.827	287.023	287.556	286.354	286.516	287.247	288.094	285.675
1308	286.874	286.945	287.051	287.711	286.249	286.479	287.172	288.182	285.718
1309	286.648	287.046	286.951	287.504	286.472	286.485	287.101	288.236	285.619
1310	286.671	287.151	286.965	287.633	286.614	286.363	287.21	288.203	285.538
1311	286.863	287.036	286.821	287.776	286.314	286.486	287.15	287.927	285.826
1312	286.992	287.133	286.773	287.685	286.249	286.348	287.256	288.072	285.893
1313	287.045	286.994	286.918	287.553	286.281	286.358	287.488	288.248	285.709
1314	286.907	286.971	286.975	287.71	286.382	286.368	287.118	288.206	285.826
1315	287.029	286.958	286.852	287.765	286.537	286.603	287.301	288.052	285.915
1316	286.98	286.917	286.814	287.559	286.632	286.601	287.304	288.103	285.698
1317	286.928	287.078	286.792	287.536	286.528	286.589	287.376	288.138	285.815
1318	287.072	287.038	286.868	287.722	286.515	286.465	287.361	288.141	285.809
1319	287.165	286.926	286.755	287.666	286.593	286.586	287.429	288.105	285.817
1320	287.043	286.87	286.863	287.628	286.654	286.593	287.395	288.182	285.853
1321	287.22	287.069	286.966	287.632	286.647	286.486	287.488	288.369	285.902
1322	287.097	287.019	286.973	287.588	286.466	286.541	287.328	288.271	285.626
1323	286.783	286.956	286.924	287.693	286.631	286.52	287.242	288.227	285.771
1324	286.889	287.084	286.86	287.687	286.693	286.495	287.189	288.265	285.635
1325	287.102	286.958	286.838	287.687	286.542	286.666	287.392	288.26	285.67
1326	287.03	287.046	286.999	287.635	286.691	286.535	287.28	288.282	285.98
1327	287.051	287.138	286.842	287.77	286.576	286.469	287.416	288.358	286.095
1328	287.163	286.91	286.628	287.605	286.492	286.409	287.37	288.384	285.91
1329	286.948	287.046	286.75	287.286	286.576	286.463	287.207	288.177	285.753
1330	286.72	286.94	286.788	287.365	286.457	286.462	287.067	288.074	285.731
1331	286.836	286.847	286.753	287.632	286.519	286.407	287.081	288.045	285.707
1332	286.967	286.923	286.843	287.51	286.547	286.532	287.151	288.129	285.866
1333	286.944	286.953	286.714	287.445	286.538	286.649	287.147	288.257	285.832
1334	287.03	286.829	286.868	287.775	286.587	286.522	287.093	288.285	285.848
1335	287.022	286.758	286.912	287.674	286.637	286.463	287.123	288.164	285.851
1336	286.893	286.739	286.858	287.432	286.515	286.313	287.139	288.092	285.762
1337	286.892	286.695	286.7	287.53	286.419	286.501	287.149	288.192	285.86
1338	286.873	286.785	286.852	287.73	286.472	286.583	287.049	288.322	285.836
1339	286.878	286.759	286.924	287.701	286.314	286.537	287.076	288.37	285.725
1340	286.905	286.786	286.803	287.803	286.27	286.552	287.115	288.372	285.845
1341	286.954	286.793	286.768	287.586	286.32	286.399	287.266	288.059	286.013
1342	286.87	286.863	286.642	287.711	286.555	286.432	287.232	288.011	285.95
1343	286.967	286.775	286.782	287.688	286.558	286.559	287.129	288.067	285.768
1344	286.885	286.782	286.794	287.615	286.505	286.525	287.191	288.186	285.701
1345	286.391	286.175	286.339	287.342	286.042	286.204	287.09	287.846	285.48
1346	286.482	286.279	286.512	287.149	285.912	286.077	286.827	287.388	285.418
1347	286.596	286.451	286.541	287.107	286.112	286.422	286.73	287.559	285.407
1348	286.682	286.576	286.676	287.244	286.249	286.426	286.816	287.74	285.525
1349	286.654	286.434	286.927	287.629	286.418	286.371	287.079	287.875	285.806
1350	286.67	286.44	286.834	287.536	286.382	286.268	287.353	288.109	285.824
1351	286.636	286.384	286.709	287.282	286.369	286.382	287.118	288.229	285.652
1352	286.716	286.537	286.867	287.549	286.559	286.336	287.268	287.856	285.64
1353	286.754	286.807	286.993	287.756	286.675	286.375	287.333	287.739	285.68
1354	286.925	286.63	286.962	287.554	286.642	286.48	287.298	287.811	285.935
1355	286.91	286.758	286.951	287.764	286.6	286.452	287.183	287.975	285.617
1356	287.04	286.78	286.885	287.839	286.597	286.455	287.248	288.249	285.813
1357	286.933	286.617	286.99	287.531	286.623	286.377	287.264	288.161	285.853
1358	286.849	286.518	287.09	287.527	286.542	286.452	287.205	288.161	285.693
1359	286.927	286.56	287.007	287.781	286.452	286.542	287.304	288.114	285.88
1360	287.102	286.738	286.825	287.754	286.649	286.446	287.412	288.1	285.989
1361	286.914	286.702	286.903	287.739	286.728	286.501	287.32	288.209	285.874
1362	286.981	286.448	286.833	287.839	286.585	286.561	287.303	288.061	285.764
1363	286.881	286.554	286.74	287.651	286.55	286.477	287.278	288.003	285.932
1364	286.703	286.609	286.839	287.617	286.685	286.426	287.106	287.972	285.936
1365	286.862	286.826	286.833	287.78	286.549	286.515	287.258	287.995	285.961
1366	287.105	286.883	286.804	287.924	286.551	286.522	287.357	288.128	286.043
1367	287.092	286.817	286.784	287.475	286.662	286.382	287.386	288.122	286.099
1368	287.081	286.791	286.852	287.647	286.61	286.503	287.276	288.047	285.988
1369	287.046	286.799	286.975	287.761	286.519	286.631	287.34	288.135	285.93
1370	287.148	286.753	286.836	287.848	286.387	286.763	287.408	288.005	285.906
1371	287.082	286.825	286.905	287.828	286.373	286.761	287.448	287.957	286
1372	286.964	286.815	286.975	287.647	286.413	286.467	287.318	288.076	286.03
1373	286.955	286.826	286.877	287.749	286.44	286.528	287.185	288.245	285.935
1374	286.958	286.716	286.764	287.827	286.528	286.594	287.311	288.143	285.858
1375	287.095	286.691	286.756	287.677	286.292	286.567	287.282	288.011	285.949
1376	287.121	286.94	286.69	287.669	286.433	286.629	287.036	288.187	285.894
1377	286.965	286.851	286.816	287.885	286.37	286.46	287.059	288.452	285.919
1378	286.974	286.777	286.987	287.693	286.342	286.579	287.283	287.991	285.903
1379	287.205	286.738	286.988	287.542	286.537	286.745	287.559	287.857	285.955
1380	287.034	286.849	286.711	287.717	286.556	286.68	287.418	288.125	285.996
1381	286.932	286.745	286.545	287.685	286.265	286.469	287.258	288.201	286.208
1382	286.805	286.826	286.854	287.436	286.254	286.392	287.377	288.075	285.841
1383	286.822	286.804	286.845	287.383	286.366	286.615	287.394	287.976	285.895
1384	286.745	286.846	286.781	287.642	286.547	286.628	287.379	288.044	285.994
1385	286.786	286.9	286.784	287.811	286.641	286.554	287.381	287.991	285.948
1386	286.75	286.707	286.839	287.635	286.675	286.562	287.232	288.048	285.911
1387	286.798	286.735	286.671	287.649	286.573	286.383	287.229	288.112	286.03
1388	286.908	286.831	286.845	287.595	286.378	286.526	287.308	288.127	286.014
1389	286.79	286.867	286.872	287.728	286.442	286.48	287.201	288.105	285.919
1390	286.761	286.805	286.603	287.513	286.463	286.297	287.082	288.178	286.112
1391	286.746	286.762	286.643	287.359	286.407	286.235	287.253	288.375	286.121
1392	286.76	286.895	286.683	287.527	286.467	286.394	287.467	288.16	285.835
1393	286.68	286.986	286.74	287.797	286.665	286.239	287.298	288.013	285.78
1394	286.805	286.883	286.801	287.732	286.742	286.357	287.252	288.051	285.806
1395	286.846	286.76	286.819	287.674	286.78	286.535	287.27	288.021	285.881
1396	286.881	286.781	286.822	287.788	286.651	286.494	287.1	288.218	285.788
1397	287.034	286.843	286.749	287.653	286.783	286.145	287.104	288.244	285.776
1398	286.986	286.902	286.715	287.539	286.784	286.218	287.193	287.991	285.872
1399	286.887	286.792	286.744	287.73	286.553	286.41	287.371	287.921	285.841
1400	286.833	286.807	286.688	287.855	286.614	286.534	287.175	287.988	285.86
1401	286.728	286.981	286.741	287.599	286.714	286.7	287.197	288.137	286.087
1402	286.87	287.036	286.792	287.652	286.708	286.629	287.246	288.209	285.998
1403	287.06	286.99	286.788	287.848	286.558	286.648	287.182	288.202	286.011
1404	286.839	286.881	286.932	287.786	286.585	286.586	287.163	288.192	286
1405	286.775	286.79	287.043	287.805	286.492	286.507	287.162	288.002	285.692
1406	287.001	286.991	286.904	287.876	286.407	286.452	287.162	288.005	285.824
1407	287.034	287.168	286.903	287.792	286.507	286.448	287.286	288.063	285.885
1408	286.888	286.986	287.147	287.562	286.572	286.579	287.198	288.159	285.837
1409	286.888	286.913	287.169	287.905	286.514	286.707	287.241	288.243	285.92
1410	286.989	287.095	286.994	287.81	286.625	286.569	287.273	288.289	285.831
1411	287.024	287.19	286.855	287.55	286.445	286.451	287.325	287.981	285.834
1412	286.874	287.141	287.13	287.688	286.421	286.559	287.38	287.871	285.872
1413	286.825	287.145	287.075	287.874	286.417	286.596	287.262	288.046	285.899
1414	286.833	287.018	286.98	287.664	286.384	286.514	287.283	288.095	285.638
1415	287.023	286.901	287.029	287.632	286.465	286.467	287.131	288.082	285.617
1416	286.901	286.907	287.03	287.665	286.548	286.593	287.201	288.042	285.755
1417	286.898	286.84	287.042	287.552	286.67	286.696	287.225	288.208	286.002
1418	286.972	287.019	287.052	287.565	286.626	286.709	287.22	288.336	285.988
1419	286.864	287.034	287.072	287.626	286.448	286.624	287.156	288.011	285.966
1420	286.927	286.863	287.051	287.5	286.431	286.594	287.545	287.843	285.877
1421	287.126	286.935	286.96	287.535	286.394	286.612	287.478	287.964	285.907
1422	287.048	287.084	286.947	287.754	286.499	286.561	287.154	288.329	285.831
1423	286.822	287.365	286.994	287.808	286.5	286.607	287.225	288.356	285.797
1424	286.775	287.352	287.049	287.833	286.315	286.537	287.289	287.991	285.721
1425	286.796	287.169	287.225	287.828	286.338	286.469	287.406	287.905	285.719
1426	286.973	287.105	287.324	288.033	286.577	286.491	287.41	288.034	285.641
1427	286.908	286.964	287.274	287.921	286.568	286.502	287.447	288.231	285.72
1428	287.026	286.863	286.912	287.734	286.36	286.511	287.356	288.331	285.771
1429	286.999	287.039	286.984	287.782	286.639	286.777	287.279	288.218	285.786
1430	286.934	287.118	287.086	287.902	286.428	286.783	287.35	288.098	285.736
1431	286.982	287.063	287.128	287.963	286.395	286.544	287.406	288.194	285.887
1432	286.95	286.919	287.103	287.921	286.38	286.332	287.474	288.217	285.771
1433	287.053	287.056	287.025	287.882	286.656	286.504	287.295	288.269	285.659
1434	287.141	286.967	287.001	287.861	286.605	286.492	287.252	288.18	285.889
1435	287.149	286.939	287.041	287.739	286.635	286.535	287.49	288.257	285.944
1436	287.2	287.048	287.054	287.878	286.624	286.81	287.488	288.286	285.668
1437	287.273	287.18	287.205	287.836	286.501	286.591	287.405	288.267	285.799
1438	287.226	287.046	287.125	287.654	286.555	286.342	287.185	288.109	285.908
1439	287.093	286.893	286.872	287.876	286.564	286.278	287.48	288.224	285.794
1440	287.095	287.088	286.912	287.837	286.545	286.322	287.495	288.288	285.754
1441	286.906	287.127	286.895	287.628	286.468	286.523	287.374	288.327	285.627
1442	286.877	287.234	286.988	287.789	286.601	286.563	287.231	288.067	285.442
1443	286.938	287.03	286.978	287.865	286.611	286.482	287.272	288.038	285.568
1444	286.977	286.958	286.983	287.662	286.471	286.338	287.118	287.985	285.687
1445	287.121	286.844	287.078	287.68	286.452	286.436	287.218	287.971	285.733
1446	287.181	286.832	287.165	287.841	286.386	286.443	287.328	288.115	285.687
1447	287.057	287.024	287.105	287.975	286.371	286.608	287.334	288.194	285.792
1448	286.935	286.939	287.053	287.992	286.474	286.6	287.304	288.028	285.677
1449	286.964	286.923	287.107	287.956	286.415	286.649	287.112	287.964	285.803
1450	286.797	286.845	286.95	287.918	286.34	286.434	287.245	288.057	285.751
1451	286.71	286.702	286.875	287.93	286.423	286.423	287.173	288.211	285.664
1452	286.867	286.701	287.007	287.9	286.526	286.514	287.26	288.078	285.653
1453	286.899	286.786	287.009	287.749	286.468	286.169	287.145	287.778	285.566
1454	286.442	286.558	286.563	287.288	286.301	286.053	287.117	287.856	285.282
1455	286.558	286.522	286.639	287.041	286.297	286.398	287.1	287.96	285.508
1456	286.731	286.63	286.784	287.3	286.229	286.427	287.278	287.939	285.562
1457	286.913	286.629	286.72	287.57	286.509	286.522	287.274	288.085	285.502
1458	286.703	286.518	286.54	287.266	285.993	285.781	286.672	287.374	285.121
1459	285.806	285.88	285.728	286.102	285.166	285.274	286.297	286.89	284.639
1460	286.137	286.233	286.24	286.175	285.272	285.523	286.43	287.208	285.054
1461	286.412	286.524	286.511	286.521	285.521	285.609	286.649	287.436	285.123
1462	286.49	286.639	286.641	286.996	285.916	285.966	286.918	287.4	285.175
1463	286.552	286.646	286.582	287.314	286.133	285.991	287.111	287.608	285.222
1464	286.695	286.761	286.57	287.22	286.138	285.957	287.095	287.914	285.395
1465	286.532	286.729	286.61	287.243	286.176	286.158	287.283	287.836	285.494
1466	286.52	286.724	286.636	287.416	286.244	286.339	287.386	287.734	285.466
1467	286.545	286.739	286.852	287.521	286.077	286.452	287.306	287.89	285.438
1468	286.544	286.842	286.602	287.466	286.103	286.558	287.162	288.007	285.427
1469	286.623	286.694	286.688	287.369	286.197	286.584	287.331	287.934	285.363
1470	286.679	286.591	286.659	287.475	286.306	286.505	287.423	287.993	285.452
1471	286.688	286.778	286.832	287.751	286.449	286.357	287.519	288.05	285.513
1472	286.663	286.936	286.983	287.608	286.412	286.269	287.285	288.166	285.605
1473	286.719	287.181	286.856	287.433	286.335	286.281	287.173	288.07	285.616
1474	286.776	287.048	286.696	287.68	286.392	286.318	287.211	288.108	285.244
1475	286.605	286.822	286.683	287.809	286.434	286.485	287.341	288.263	285.438
1476	286.726	286.954	286.756	287.567	286.506	286.476	287.504	288.17	285.617
1477	286.512	286.782	286.588	287.364	286.323	286.08	287.201	287.957	285.273
1478	286.564	286.664	286.686	287.506	286.324	286.202	287.236	288.046	285.253
1479	286.666	286.75	286.876	287.396	286.371	286.459	287.263	288.076	285.469
1480	286.794	286.849	286.712	287.387	286.35	286.385	287.398	288.215	285.479
1481	286.705	286.696	286.566	287.608	286.533	286.347	287.27	288.166	285.46
1482	286.595	286.729	286.707	287.721	286.653	286.333	287.231	287.89	285.539
1483	286.628	286.799	286.917	287.483	286.341	286.428	287.444	287.921	285.514
1484	286.579	286.898	286.881	287.54	286.276	286.412	287.348	288	285.604
1485	286.689	286.941	286.812	287.807	286.402	286.421	287.36	288.298	285.66
1486	286.733	286.945	286.841	287.84	286.49	286.481	287.428	288.122	285.588
1487	286.894	286.892	286.929	287.706	286.572	286.542	287.476	287.943	285.592
1488	286.869	286.845	286.904	287.755	286.451	286.49	287.246	288.124	285.442
1489	286.856	286.728	286.932	287.745	286.375	286.751	287.277	288.243	285.67
1490	286.762	286.862	286.765	287.798	286.371	286.563	287.381	288.091	285.558
1491	286.784	286.951	286.774	287.974	286.344	286.449	287.373	288.045	285.506
1492	286.865	286.945	286.894	287.763	286.575	286.581	287.242	287.994	285.47
1493	286.818	286.827	287.028	287.618	286.614	286.603	287.113	288.287	285.55
1494	286.845	286.725	286.993	287.806	286.628	286.617	287.205	288.384	285.577
1495	286.87	286.873	286.889	287.816	286.579	286.63	287.237	288.051	285.557
1496	286.775	286.938	286.886	287.719	286.525	286.578	287.339	288.028	285.566
1497	286.741	286.952	286.811	287.891	286.491	286.501	287.403	288.093	285.478
1498	286.765	286.968	286.8	288.031	286.442	286.423	287.299	288.237	285.576
1499	286.904	286.96	286.949	287.928	286.572	286.662	287.37	288.358	285.844
1500	286.917	286.836	286.997	287.902	286.445	286.53	287.329	288.118	285.737
1501	286.882	286.859	286.996	287.798	286.52	286.385	287.22	288.009	285.563
1502	286.748	286.754	286.93	287.792	286.46	286.369	287.181	287.967	285.575
1503	286.716	286.767	286.907	287.768	286.651	286.62	287.136	288.079	285.773
1504	286.65	286.786	286.971	287.904	286.545	286.83	287.137	288.176	285.927
1505	286.692	286.904	286.824	287.757	286.367	286.585	287.242	288.164	285.889
1506	286.784	286.905	286.93	287.578	286.376	286.457	287.42	288.105	285.958
1507	286.766	286.893	287.071	287.898	286.479	286.478	287.387	288.106	285.762
1508	286.711	286.952	287.065	287.974	286.385	286.552	287.362	288.193	285.678
1509	286.854	287.158	286.859	287.707	286.469	286.493	287.139	288.301	285.563
1510	286.842	286.876	286.82	287.903	286.492	286.594	287.046	288.089	285.676
1511	286.879	287.011	286.793	287.805	286.375	286.501	287.061	287.577	285.678
1512	286.777	287.086	286.798	287.718	286.405	286.569	287.261	287.74	285.645
1513	286.739	286.98	286.843	287.73	286.367	286.605	287.295	287.947	285.756
1514	286.65	286.93	286.967	287.954	286.37	286.482	287.224	288.048	285.881
1515	286.721	287.003	286.807	288.009	286.329	286.312	287.332	288.001	285.786
1516	286.794	286.955	286.759	287.748	286.441	286.528	287.297	288.077	285.861
1517	287.005	287.1	286.829	287.833	286.438	286.51	287.42	288.159	285.911
1518	287.037	286.96	287.046	287.978	286.483	286.344	287.266	287.925	285.664
1519	286.827	286.912	287.077	287.696	286.493	286.362	287.272	287.942	285.729
1520	286.812	287.149	287.054	287.654	286.547	286.392	287.386	288.227	285.735
1521	286.764	287.108	287.077	287.853	286.644	286.43	287.162	288.225	285.656
1522	286.95	287.076	287.037	287.698	286.798	286.536	287.253	287.848	285.851
1523	287.088	287.185	286.926	287.727	286.813	286.439	287.346	287.924	285.897
1524	286.832	287.151	286.888	287.709	286.55	286.425	287.332	288.047	285.881
1525	286.934	286.972	286.932	287.76	286.373	286.556	287.158	288.18	285.858
1526	287.027	286.921	287.058	287.888	286.388	286.588	287.175	288.215	285.737
1527	286.92	286.863	287.117	287.97	286.571	286.66	287.199	288.015	285.697
1528	286.787	286.856	286.989	287.736	286.48	286.799	287.155	288.082	285.691
1529	286.729	286.872	286.894	287.767	286.45	286.508	287.239	288.201	285.752
1530	286.848	287.019	287.017	287.743	286.512	286.33	287.308	288.315	285.867
1531	286.916	286.952	287.183	287.828	286.669	286.559	287.352	288.182	285.746
1532	287.073	286.978	287.137	287.912	286.598	286.652	287.29	288.042	285.756
1533	287.172	287.032	286.997	287.909	286.608	286.52	287.37	288.011	285.99
1534	286.899	286.927	286.991	287.767	286.625	286.42	287.319	288.067	285.935
1535	286.878	286.991	287.056	287.958	286.512	286.683	287.343	288.19	285.895
1536	287.002	287.017	287.066	288.012	286.639	286.673	287.417	288.227	285.775
1537	286.966	286.985	287.1	287.547	286.623	286.616	287.395	288.126	285.773
1538	286.849	287.077	287.201	287.763	286.471	286.796	287.494	288.179	285.684
1539	286.891	287.055	287.149	287.781	286.388	286.587	287.616	288.132	285.982
1540	286.839	286.914	287.273	287.672	286.567	286.622	287.517	288.181	285.862
1541	286.759	286.873	287.283	287.929	286.578	286.682	287.568	288.087	285.738
1542	286.78	286.973	287.15	287.845	286.604	286.537	287.543	288.187	285.667
1543	286.906	287.001	287.091	287.801	286.593	286.667	287.47	288.106	285.823
1544	287.013	286.958	286.998	288.053	286.706	286.657	287.41	288.195	285.837
1545	286.865	287.035	286.795	288.095	286.921	286.611	287.372	288.244	285.743
1546	287.029	286.933	286.954	287.95	286.804	286.667	287.427	288.207	285.986
1547	286.783	286.945	287.151	288.049	286.581	286.672	287.506	288.223	286.036
1548	286.917	287.052	287.001	288.167	286.515	286.682	287.302	288.069	285.86
1549	286.955	287.018	286.799	288.008	286.515	286.67	287.307	288.169	285.828
1550	286.999	286.985	286.937	288.092	286.584	286.547	287.387	288.332	285.874
1551	287.091	286.956	287.035	288.129	286.405	286.575	287.216	288.438	285.88
1552	286.939	286.889	287.096	287.963	286.538	286.571	287.27	288.167	285.809
1553	286.911	286.822	286.938	287.972	286.777	286.67	287.57	288.127	285.825
1554	286.842	286.812	286.952	287.951	286.543	286.602	287.545	288.2	285.631
1555	286.897	286.802	286.865	287.723	286.441	286.579	287.431	288.358	285.77
1556	286.943	286.916	286.933	287.834	286.562	286.605	287.454	288.226	285.956
1557	287.204	287.094	286.807	288.052	286.707	286.679	287.546	287.95	285.871
1558	286.931	287.044	286.777	287.689	286.479	286.515	287.61	287.866	285.751
1559	286.872	286.975	286.902	287.755	286.441	286.485	287.356	288.168	285.77
1560	286.882	286.857	286.756	287.968	286.54	286.435	287.343	288.206	285.791
1561	287.02	286.788	286.831	287.806	286.631	286.546	287.353	288.334	285.824
1562	287.134	286.862	286.914	288.004	286.532	286.604	287.437	288.258	286.007
1563	286.934	287.013	286.981	287.98	286.532	286.667	287.46	288.182	285.903
1564	286.932	286.788	287.026	287.965	286.564	286.52	287.399	288.213	285.6
1565	287.043	286.899	286.94	288.085	286.725	286.501	287.347	288.112	285.801
1566	287.063	287.043	287.003	288.009	286.635	286.61	287.432	288.025	285.942
1567	287.023	286.899	286.886	287.879	286.578	286.525	287.417	288.164	285.737
1568	286.873	286.846	286.71	287.849	286.496	286.561	287.407	288.219	285.747
1569	286.867	286.847	286.639	287.926	286.439	286.576	287.448	288.198	285.56
1570	286.812	286.818	286.644	287.82	286.453	286.628	287.478	287.94	285.718
1571	287.011	286.92	286.846	288.13	286.478	286.424	287.517	288.021	286.057
1572	286.988	286.777	287.036	288.089	286.43	286.356	287.479	288.148	285.967
1573	286.824	286.735	286.929	287.844	286.426	286.394	287.365	288.109	285.598
1574	286.846	286.839	286.923	288.077	286.572	286.5	287.477	288.053	285.757
1575	286.959	286.881	286.888	288.358	286.341	286.534	287.41	288.055	285.902
1576	286.883	286.797	286.816	288.089	286.445	286.472	287.437	288.1	285.8
1577	287.009	286.931	286.909	287.967	286.429	286.529	287.288	288.023	285.74
1578	287.018	286.905	286.834	288.189	286.368	286.677	287.236	287.941	285.687
1579	287.014	286.887	286.868	288.222	286.519	286.625	287.335	288.026	285.645
1580	286.906	286.805	286.831	288.045	286.646	286.461	287.321	288.176	285.72
1581	286.896	286.841	286.871	287.663	286.442	286.447	287.459	288.298	285.691
1582	286.882	286.898	286.879	287.774	286.145	286.386	287.424	287.975	285.499
1583	287.042	286.766	286.74	288.07	286.148	286.52	287.359	287.882	285.702
1584	286.926	286.882	286.807	287.894	286.24	286.515	287.392	287.954	285.711
1585	286.699	286.497	286.435	287.636	286.054	286.253	286.973	287.844	285.381
1586	286.614	286.485	286.458	287.311	286.035	286.263	287.15	288.06	285.269
1587	286.755	286.502	286.698	287.465	286.253	286.409	287.125	287.939	285.372
1588	286.791	286.556	286.703	287.804	286.357	286.37	287.074	287.97	285.489
1589	286.78	286.668	286.782	287.718	286.333	286.431	287.273	288.189	285.377
1590	286.822	286.851	286.809	287.65	286.272	286.426	287.249	288.031	285.288
1591	286.902	286.991	286.788	287.918	286.357	286.563	287.402	288.015	285.528
1592	286.84	286.806	286.81	287.941	286.516	286.635	287.408	288.247	285.6
1593	286.845	286.623	286.881	287.89	286.397	286.595	287.086	288.207	285.772
1594	286.941	286.689	287.006	287.797	286.447	286.494	287.175	288.031	285.375
1595	286.615	286.404	286.687	287.661	286.466	286.438	287.086	287.901	285.312
1596	286.455	286.416	286.533	287.472	286.187	286.272	286.941	287.857	285.089
1597	286.594	286.573	286.697	287.294	286.199	286.472	286.994	288.121	285.088
1598	286.752	286.5	286.843	287.614	286.391	286.406	287.141	288.023	285.328
1599	286.869	286.625	286.753	287.772	286.476	286.468	287.042	287.971	285.389
1600	286.702	286.49	286.439	287.402	286.135	286.175	286.782	287.426	285.15
1601	286.582	286.473	286.445	286.941	285.685	285.865	286.645	287.535	285.073
1602	286.429	286.573	286.617	287.15	286.084	286.092	286.776	287.831	285.342
1603	286.47	286.502	286.665	287.141	286.346	286.207	286.925	287.747	285.11
1604	286.786	286.624	286.714	287.273	286.488	286.303	286.936	287.771	285.013
1605	286.946	286.754	286.799	287.644	286.43	286.298	287.082	287.922	285.285
1606	286.725	286.743	286.628	287.761	286.496	286.295	287.034	288.006	285.047
1607	286.666	286.769	286.699	287.709	286.458	286.143	287.131	288.017	285.263
1608	286.73	286.767	286.76	287.641	286.311	286.276	287.148	287.992	285.465
1609	286.929	286.808	286.912	287.744	286.272	286.407	287.133	287.982	285.308
1610	286.947	286.623	286.925	287.85	286.249	286.418	287.365	287.99	285.441
1611	286.946	286.617	286.855	287.661	286.444	286.442	287.384	287.998	285.424
1612	286.917	286.571	286.952	287.827	286.43	286.408	287.254	287.963	285.72
1613	286.924	286.796	287.01	287.96	286.559	286.54	287.29	287.972	285.743
1614	287.056	286.956	286.986	287.857	286.512	286.488	287.401	287.994	285.49
1615	287.079	286.804	286.928	287.781	286.305	286.47	287.256	287.995	285.518
1616	286.966	286.832	286.886	287.92	286.327	286.383	287.201	288.027	285.505
1617	286.891	286.865	286.882	287.772	286.31	286.346	287.172	288.208	285.504
1618	286.906	286.8	286.878	287.7	286.301	286.535	287.242	288.161	285.433
1619	286.875	286.57	286.873	287.787	286.42	286.507	287.227	288.182	285.42
1620	287.035	286.599	286.738	287.937	286.389	286.513	287.179	288.36	285.406
1621	287.033	286.786	286.716	287.805	286.525	286.514	287.044	288.214	285.346
1622	286.994	286.706	286.9	288.038	286.557	286.511	287.18	288.096	285.41
1623	287.047	286.719	286.925	287.938	286.524	286.469	287.291	288.08	285.448
1624	286.889	286.827	286.951	287.799	286.498	286.464	287.263	288.067	285.453
1625	286.805	286.887	286.929	287.988	286.549	286.446	287.205	288.171	285.343
1626	286.917	286.865	286.821	287.918	286.52	286.46	287.299	288.33	285.537
1627	286.888	286.787	286.882	287.835	286.45	286.569	287.315	288.208	285.513
1628	286.861	286.735	286.825	288	286.582	286.404	287.027	288.048	285.559
1629	286.738	286.753	286.784	288.036	286.501	286.351	287.076	288.149	285.518
1630	286.956	286.841	286.884	287.983	286.587	286.389	287.25	288.118	285.434
1631	286.79	286.775	286.904	287.716	286.528	286.322	287.304	288.043	285.342
1632	286.783	286.848	286.844	287.983	286.468	286.41	287.245	288.156	285.51
1633	286.813	286.795	286.692	288.074	286.592	286.23	287.243	288.349	285.676
1634	286.771	286.706	286.743	287.768	286.556	286.268	287.215	288.186	285.565
1635	286.856	286.874	286.853	288.024	286.453	286.322	287.37	288.047	285.448
1636	286.998	286.813	286.94	288.195	286.31	286.321	287.517	288.241	285.63
1637	286.859	286.605	286.828	287.998	286.386	286.478	287.463	288.28	285.583
1638	286.786	286.657	286.694	287.921	286.319	286.528	287.517	288.041	285.512
1639	286.754	286.744	286.757	287.926	286.414	286.418	287.467	287.991	285.515
1640	286.677	286.698	286.963	288.107	286.504	286.514	287.283	287.934	285.675
1641	286.137	286.073	286.164	287.24	285.859	286.148	286.966	287.352	285.137
1642	286.203	286.221	286.167	287.121	285.744	285.969	286.754	287.566	285.065
1643	286.502	286.52	286.384	287.351	286.056	286.068	286.696	287.667	285.088
1644	286.626	286.664	286.313	287.492	286.268	286.185	287.015	287.718	285.079
1645	286.499	286.787	286.381	287.754	286.324	286.26	287.169	287.843	285.271
1646	286.236	286.671	286.362	287.681	286.137	286.255	287.32	287.946	285.426
1647	286.405	286.511	286.605	287.525	286.102	286.234	287.132	287.772	285.116
1648	286.531	286.696	286.499	287.775	286.133	286.225	287.153	287.831	285.135
1649	286.691	286.784	286.458	287.777	286.348	286.413	287.136	288.139	285.385
1650	286.782	286.712	286.464	287.685	286.382	286.465	287.272	288.206	285.358
1651	286.786	286.621	286.615	287.551	286.449	286.524	287.398	287.994	285.32
1652	286.891	286.872	286.691	287.795	286.5	286.673	287.357	287.928	285.687
1653	286.959	287.076	286.644	287.914	286.381	286.61	287.31	288.021	285.422
1654	286.768	286.907	286.629	287.747	286.278	286.539	287.381	288.036	285.102
1655	286.697	286.79	286.546	287.783	286.227	286.346	287.44	288.124	285.158
1656	286.787	286.824	286.744	287.78	286.211	286.274	287.287	288.119	285.456
1657	286.818	286.753	286.67	287.797	286.294	286.391	287.376	288.13	285.411
1658	286.705	286.554	286.567	287.753	286.51	286.274	287.362	288.196	285.409
1659	286.683	286.714	286.651	287.83	286.504	286.288	287.333	288.043	285.469
1660	286.96	286.747	286.685	287.779	286.142	286.343	287.193	287.896	285.453
1661	287.006	286.659	286.591	287.728	286.274	286.304	287.291	287.927	285.504
1662	286.89	286.734	286.534	288.005	286.526	286.417	287.22	287.907	285.51
1663	286.846	286.842	286.54	288.027	286.517	286.42	287.308	288.086	285.456
1664	286.944	286.915	286.662	288.025	286.449	286.42	287.349	288.202	285.459
1665	286.8	286.809	286.743	288.16	286.435	286.508	287.128	288.204	285.567
1666	286.805	286.8	286.747	288.174	286.592	286.497	287.154	288.32	285.776
1667	286.929	286.818	286.935	287.86	286.467	286.514	287.349	288.049	285.426
1668	286.833	286.675	287.008	287.696	286.218	286.392	287.292	287.976	285.21
1669	286.901	286.701	286.98	288.018	286.262	286.408	287.257	288.114	285.37
1670	286.848	286.662	286.798	288.009	286.293	286.371	287.113	288.176	285.324
1671	286.965	286.8	286.65	287.793	286.399	286.351	287.101	288.005	285.263
1672	287.048	286.911	286.699	287.874	286.411	286.428	287.295	287.945	285.431
1673	286.768	286.84	286.694	288.048	286.14	286.411	287.239	288.027	285.431
1674	286.638	286.804	286.704	287.753	286.084	286.314	287.186	287.829	285.322
1675	286.582	286.946	286.858	287.649	286.253	286.319	287.028	287.841	285.423
1676	286.62	286.766	286.915	287.815	286.331	286.522	287.105	287.927	285.551
1677	286.738	286.831	286.812	287.923	286.374	286.629	287.25	288.191	285.618
1678	286.772	286.856	286.733	287.781	286.376	286.448	287.235	288.224	285.576
1679	286.808	286.788	286.746	287.82	286.332	286.335	287.303	287.893	285.643
1680	286.866	286.667	286.833	287.761	286.634	286.422	287.147	287.973	285.729
1681	286.883	286.653	286.897	287.744	286.556	286.496	287.287	288.032	285.428
1682	286.852	286.807	286.835	287.754	286.274	286.289	287.323	288.258	285.499
1683	286.897	286.806	286.773	287.913	286.302	286.28	287.339	288.131	285.664
1684	286.866	286.665	286.8	288.048	286.305	286.389	287.151	288	285.648
1685	286.846	286.818	286.891	287.946	286.263	286.477	287.296	288.015	285.592
1686	286.831	286.834	286.974	287.925	286.5	286.371	287.302	288.056	285.727
1687	286.888	286.792	286.918	288.122	286.577	286.296	287.316	288.242	285.635
1688	286.942	286.629	286.82	288.141	286.609	286.306	287.225	288.246	285.472
1689	286.897	286.621	286.908	287.889	286.684	286.321	287.259	287.962	285.466
1690	286.973	286.692	286.767	287.964	286.547	286.333	287.302	287.91	285.52
1691	287.099	286.808	286.836	288.045	286.325	286.387	287.36	288.114	285.43
1692	287.063	286.974	287.052	287.983	286.332	286.476	287.173	288.191	285.558
1693	286.972	286.901	286.881	288.038	286.223	286.522	287.32	288.032	285.508
1694	286.862	286.765	286.598	288.06	286.39	286.544	287.23	287.9	285.524
1695	286.526	286.282	286.463	287.616	286.102	286.14	287.048	287.547	285.397
1696	286.529	285.951	286.337	287.207	285.884	285.927	286.735	287.499	285.192
1697	286.511	286.409	286.467	287.467	286.028	286.052	286.865	287.698	285.205
1698	286.407	286.603	286.471	287.634	286.133	286.177	287.006	287.679	285.248
1699	286.713	286.694	286.54	287.761	286.387	286.382	287.081	287.83	285.501
1700	286.852	286.833	286.729	287.828	286.499	286.34	287.195	288.024	285.527
1701	286.642	286.918	286.78	287.752	286.327	286.283	287.053	287.86	285.311
1702	286.695	286.748	286.582	287.885	286.179	286.418	287.019	287.879	285.499
1703	286.792	286.64	286.561	288.077	286.395	286.356	287.055	287.871	285.659
1704	286.763	286.565	286.681	287.808	286.442	286.516	287.183	287.968	285.638
1705	286.817	286.571	286.803	287.735	286.379	286.504	287.174	288.096	285.37
1706	286.946	286.752	286.847	288.145	286.392	286.428	287.199	288.12	285.447
1707	286.824	286.845	286.829	288.149	286.526	286.327	287.22	288.066	285.625
1708	286.971	286.833	286.762	287.785	286.436	286.34	287.306	288.063	285.838
1709	286.861	286.67	286.768	287.972	286.279	286.351	287.215	288.008	285.625
1710	286.71	286.718	286.839	287.997	286.32	286.547	287.145	288.087	285.38
1711	286.73	286.827	286.964	287.861	286.254	286.599	287.207	288.088	285.481
1712	286.808	286.837	286.847	288.031	286.254	286.356	287.065	288.067	285.474
1713	286.784	286.664	286.977	287.99	286.268	286.34	287.032	288.165	285.502
1714	286.603	286.803	286.867	287.826	286.48	286.337	287.253	288.384	285.65
1715	286.544	287.044	286.867	288.019	286.434	286.26	287.254	288.217	285.519
1716	286.722	286.95	286.81	288.124	286.331	286.272	287.181	288.225	285.673
1717	286.694	286.938	286.847	288.071	286.305	286.284	287.156	288.116	285.541
1718	286.681	286.964	286.887	288.109	286.402	286.366	287.17	288.065	285.369
1719	286.78	286.85	286.963	288.059	286.605	286.597	287.255	288.037	285.616
1720	286.901	286.853	286.905	288.044	286.517	286.609	287.305	288.174	285.567
1721	286.927	286.969	286.82	288.033	286.404	286.412	287.21	288.329	285.326
1722	286.623	286.907	286.892	288.066	286.361	286.223	287.217	288.056	285.475
1723	286.719	286.877	287.046	288.047	286.534	286.233	287.158	287.951	285.561
1724	286.796	286.884	287.013	288.043	286.379	286.244	287.242	288.082	285.643
1725	286.887	286.869	287.064	288.05	286.334	286.374	287.388	288.414	285.529
1726	286.89	286.969	287.043	288.187	286.332	286.556	287.24	288.066	285.573
1727	286.939	286.765	287.017	288.26	286.371	286.414	287.247	287.905	285.715
1728	286.79	286.753	287.01	288.033	286.37	286.516	287.33	288.061	285.462
1729	286.52	286.451	286.752	287.771	286.128	286.28	287.268	288.118	285.357
1730	286.541	286.561	286.746	287.922	286.133	286.278	287.299	288.13	285.444
1731	286.594	286.63	286.773	287.904	286.317	286.27	287.389	288.184	285.247
1732	286.713	286.639	286.796	288.108	286.427	286.31	287.133	288.234	285.4
1733	286.826	286.723	286.882	287.924	286.575	286.528	287.133	288.227	285.358
1734	286.817	286.774	287.131	287.763	286.589	286.442	287.229	288.181	285.184
1735	286.746	286.493	287.105	288.088	286.427	286.441	287.138	288.012	285.313
1736	286.788	286.663	286.878	288.148	286.356	286.436	287.124	288.243	285.553
1737	286.93	286.886	286.908	288.062	286.384	286.545	287.204	288.274	285.617
1738	286.985	286.895	286.905	288.209	286.473	286.601	287.251	288.122	285.687
1739	286.956	286.75	286.81	288.215	286.602	286.493	287.378	288.085	285.469
1740	286.964	286.697	286.726	287.921	286.429	286.253	287.169	288.104	285.316
1741	286.775	286.851	286.653	288.08	286.416	286.381	287.226	288.091	285.536
1742	286.752	287.002	286.656	288.266	286.477	286.626	287.316	288.288	285.361
1743	286.794	286.974	286.916	287.969	286.341	286.535	287.121	288.385	285.448
1744	286.933	286.804	286.873	287.86	286.355	286.566	287.155	288.231	285.64
1745	286.801	286.777	286.916	288.097	286.512	286.564	287.24	287.936	285.609
1746	286.787	286.77	286.964	288.174	286.688	286.72	287.401	287.961	285.47
1747	286.72	286.646	287.079	288.073	286.738	286.857	287.348	288.101	285.361
1748	286.895	286.686	286.981	288.239	286.684	286.797	287.463	288.211	285.632
1749	286.882	286.62	287.01	288.251	286.585	286.526	287.521	288.426	285.707
1750	286.784	286.779	286.96	287.995	286.646	286.549	287.558	288.481	285.67
1751	286.88	286.736	286.924	288.245	286.538	286.541	287.513	288.127	285.695
1752	286.961	286.877	286.891	288.111	286.454	286.664	287.478	287.981	285.583
1753	286.743	287.015	287.04	287.799	286.441	286.723	287.296	287.887	285.703
1754	286.815	286.788	287.054	287.925	286.478	286.638	287.28	288.016	286.031
1755	286.95	286.785	286.788	287.942	286.549	286.469	287.442	288.096	285.81
1756	287.036	286.866	286.761	287.874	286.395	286.401	287.335	288.194	285.719
1757	286.96	286.962	286.964	287.973	286.555	286.257	287.406	288.062	285.655
1758	286.809	286.829	286.711	288.125	286.595	286.464	287.345	287.891	285.524
1759	286.945	286.92	286.751	287.949	286.587	286.639	287.292	287.933	285.557
1760	286.983	286.766	286.813	287.853	286.372	286.515	287.305	288.167	285.818
1761	286.926	286.798	286.726	288.049	286.59	286.327	287.422	288.327	285.88
1762	286.813	286.817	286.707	288.071	286.437	286.336	287.445	288.233	285.627
1763	286.778	286.771	286.64	287.555	286.321	286.422	287.331	287.942	285.545
1764	286.763	286.763	286.707	287.442	286.363	286.461	287.215	288.001	285.65
1765	286.765	286.661	286.662	287.664	286.367	286.375	287.354	288.093	285.793
1766	286.71	286.633	286.611	287.57	286.361	286.379	287.364	288.068	285.658
1767	286.56	286.718	286.685	287.694	286.426	286.398	287.411	288.084	285.662
1768	286.779	286.695	286.678	287.828	286.371	286.401	287.246	288.209	285.714
1769	286.892	286.812	286.779	287.939	286.518	286.455	287.385	288.224	285.613
1770	286.879	286.728	286.742	287.675	286.564	286.473	287.409	288.185	285.587
1771	286.896	286.837	286.714	287.717	286.509	286.529	287.488	288.078	285.699
1772	286.825	286.856	286.782	287.825	286.456	286.37	287.445	288.064	285.769
1773	286.807	286.616	286.855	287.69	286.55	286.176	287.349	288.063	285.835
1774	286.823	286.758	286.843	287.802	286.606	286.188	287.4	288.065	285.601
1775	286.95	286.876	286.913	287.983	286.582	286.38	287.422	288.38	285.591
1776	287.041	286.802	286.912	287.837	286.566	286.345	287.344	288.426	285.839
1777	286.868	286.797	286.862	287.727	286.563	286.523	287.519	288.151	285.863
1778	286.901	286.996	286.758	287.848	286.465	286.424	287.249	288.065	285.672
1779	287.008	287.048	286.954	287.915	286.501	286.37	287.241	288.19	285.637
1780	286.949	286.975	287.194	287.795	286.566	286.388	287.343	288.254	285.637
1781	286.636	286.979	286.951	287.929	286.63	286.431	287.495	288.399	285.562
1782	286.831	287.057	286.795	287.844	286.674	286.326	287.463	288.291	285.672
1783	286.525	286.781	286.258	287.495	286.353	286.42	287.146	288.216	285.62
1784	286.54	286.807	286.619	287.717	285.79	286.084	287.033	288.1	285.287
1785	286.602	286.646	286.784	287.782	286.034	286.031	287.171	288.095	285.319
1786	286.564	286.79	286.733	287.521	286.234	286.092	287.392	288.233	285.413
1787	286.698	286.805	286.689	287.752	286.185	286.215	287.519	288.132	285.486
1788	286.925	286.911	286.818	287.824	286.276	286.344	287.419	288.082	285.494
1789	286.827	286.895	286.85	287.506	286.255	286.376	287.513	287.974	285.441
1790	286.715	286.933	286.817	287.77	286.436	286.395	287.278	288.065	285.412
1791	286.691	286.952	286.832	288.02	286.48	286.464	287.391	288.238	285.374
1792	286.618	287.032	286.867	287.907	286.263	286.508	287.376	288.274	285.534
1793	286.781	287.008	286.924	287.831	286.334	286.438	287.411	288.255	285.668
1794	286.923	287.052	286.859	287.838	286.519	286.43	287.434	288.267	285.613
1795	286.81	286.894	286.773	287.709	286.569	286.469	287.455	288.274	285.598
1796	286.716	286.775	286.806	287.863	286.456	286.409	287.242	288.273	285.466
1797	286.802	286.83	286.684	287.89	286.439	286.392	287.146	288.322	285.401
1798	286.875	286.89	286.753	287.829	286.383	286.338	287.146	288.396	285.467
1799	286.755	287.021	286.911	287.789	286.454	286.518	287.268	287.965	285.772
1800	286.74	286.995	286.862	287.722	286.657	286.781	287.376	287.835	285.768
1801	286.782	287.04	286.774	287.941	286.629	286.692	287.214	287.99	285.768
1802	286.767	286.932	286.856	287.966	286.425	286.668	287.241	288.149	285.722
1803	286.811	286.893	286.837	287.946	286.294	286.671	287.319	288.202	285.767
1804	286.897	286.88	286.719	287.775	286.35	286.776	287.462	288.164	285.818
1805	286.921	286.904	286.832	287.992	286.441	286.765	287.474	288.249	285.878
1806	286.927	287.033	286.83	287.819	286.502	286.716	287.166	288.311	285.7
1807	286.856	287.065	286.832	287.761	286.441	286.903	287.345	288.115	285.733
1808	286.726	286.857	286.889	287.862	286.617	286.649	287.387	288.121	285.657
1809	286.662	286.93	286.647	287.845	286.129	285.979	286.934	287.696	285.27
1810	286.069	286.281	286.044	287.186	285.864	285.635	286.859	287.392	285.123
1811	286.48	286.529	286.344	287.003	286.163	286.06	286.967	287.357	285.228
1812	286.632	286.54	286.555	287.053	286.233	286.319	287.161	287.652	285.37
1813	286.56	286.672	286.552	287.338	286.167	286.409	287.381	287.943	285.332
1814	286.506	286.585	286.725	287.46	286.36	286.331	287.394	288.072	285.394
1815	286.263	286.23	286.656	287.075	286.172	285.926	287.237	287.488	285.319
1816	286.117	286.13	286.26	286.303	285.387	285.156	286.747	287.139	284.774
1817	286.456	286.474	286.426	286.538	285.583	285.518	286.716	287.463	285.111
1818	286.523	286.66	286.552	286.796	285.954	285.737	286.781	287.544	285.376
1819	286.507	286.793	286.787	287.122	286.162	285.891	287.041	287.692	285.491
1820	286.644	286.795	286.894	287.367	286.118	286.069	287.205	287.754	285.396
1821	286.595	286.78	286.604	287.313	286.296	286.214	287.349	287.775	285.432
1822	286.612	286.579	286.615	287.276	286.325	286.182	287.362	288.019	285.528
1823	286.585	286.639	286.766	287.267	286.415	286.239	287.206	288.024	285.449
1824	286.638	286.752	286.732	287.544	286.394	286.267	287.129	287.923	285.492
1825	286.513	286.726	286.89	287.529	286.29	286.156	287.278	288.017	285.507
1826	286.576	286.61	286.789	287.161	286.408	286.188	287.398	288.127	285.614
1827	286.662	286.738	286.862	287.333	286.476	286.127	287.393	288.08	285.438
1828	286.772	287.024	286.913	287.494	286.551	286.331	287.386	287.915	285.571
1829	286.875	286.973	286.949	287.641	286.51	286.333	287.312	287.958	285.574
1830	286.715	286.772	286.883	287.696	286.578	286.458	287.284	288.012	285.292
1831	286.601	286.51	286.606	287.165	286.076	286.224	286.891	287.845	285.083
1832	286.438	286.351	286.321	286.602	286.02	285.926	286.909	287.783	285
1833	286.682	286.585	286.739	286.895	286.26	285.93	286.985	287.843	285.047
1834	286.675	286.648	286.785	287.267	286.246	286.149	287.184	288.032	285.207
1835	286.251	286.277	286.362	287.115	286.015	286.144	286.95	287.878	285.098
1836	286.342	286.261	286.369	286.751	286.036	286.122	286.987	287.801	285.063
1837	286.621	286.561	286.58	286.982	286.252	286.1	287.241	287.771	285.412
1838	286.791	286.654	286.666	287.405	286.374	286.115	287.307	287.969	285.726
1839	286.855	286.696	286.829	287.538	286.509	286.382	287.352	288.199	285.607
1840	287.028	286.731	286.83	287.493	286.545	286.253	287.264	288.107	285.666
1841	287.006	286.749	286.822	287.773	286.42	286.338	287.302	288.108	285.676
1842	286.836	286.71	286.879	287.864	286.371	286.499	287.344	288.071	285.599
1843	286.922	286.672	287.005	287.701	286.296	286.407	287.3	288.081	285.668
1844	286.909	286.763	287.042	287.903	286.512	286.336	287.373	288.19	285.486
1845	287.042	286.811	287.022	287.697	286.727	286.564	287.477	288.204	285.533
1846	286.915	286.668	287.094	287.54	286.493	286.629	287.483	288.238	285.557
1847	286.888	286.673	287.187	287.677	286.329	286.299	287.202	287.952	285.603
1848	286.967	286.763	287.013	287.732	286.341	286.286	287.292	288.189	285.654
1849	287.021	286.906	287.021	287.688	286.525	286.389	287.365	288.281	285.742

## Sheet: NH MJJA TAS (Kelvin)
Year	UKESM1 r1	UKESM1 r2	UKESM1 r3	CESM2(WACCM6ma)	MPI-ESM1-2-LR r1	MPI-ESM1-2-LR r2	MRI-ESM2	MIROC-ES2L	IPSL-CM6A-LR
1250	285.424	284.914	285.351	285.871	284.66	284.315	286.258	286.994	285.139
1251	285.195	285.377	284.947	285.36	284.378	285.197	286.149	287.293	285.041
1252	284.849	284.963	285.316	284.928	284.975	284.516	285.706	287.292	285.286
1253	285.252	285.262	285.43	285.211	284.737	284.779	286.246	287.223	284.839
1254	285.391	285.339	285.342	285.512	284.278	284.738	286.15	287.502	285.272
1255	285.338	284.945	284.945	285.093	284.391	285.276	285.958	286.93	284.459
1256	284.836	285.657	285.778	285.184	284.709	285.132	286.379	286.988	284.998
1257	285.242	285.284	285.208	285.043	285.345	285.098	286.238	287.476	284.829
1258	284.684	283.779	284.21	281.426	282.865	282.247	283.909	284.48	283.352
1259	284.992	284.242	284.378	281.298	282.782	283.204	284.571	285.036	283.792
1260	284.667	284.833	285.052	282.62	283.554	283.839	284.986	286.027	283.916
1261	284.463	284.917	285.091	283.477	284.162	284.355	285.019	286.301	284.433
1262	284.65	284.717	285.24	284.214	284.342	284.607	285.421	286.274	284.81
1263	284.89	284.558	284.808	284.082	283.642	284.369	285.196	286.64	284.065
1264	285.465	285.093	285.052	284.495	284.342	284.761	285.425	286.563	284.448
1265	285.319	284.83	285.046	284.512	284.404	284.565	285.499	287.286	284.976
1266	284.971	284.53	284.673	284.53	284.518	284.859	285.599	286.832	284.483
1267	285.23	285.132	284.95	284.653	284.378	284.56	285.774	286.883	285.456
1268	284.904	285.236	284.793	284.747	284.896	284.683	285.971	286.987	284.966
1269	285.24	284.656	285.137	285.102	284.591	284.892	285.847	286.572	285.124
1270	285.134	284.667	285.305	284.995	284.366	284.4	285.663	286.932	284.928
1271	285.378	284.38	284.845	284.927	284.403	284.917	285.52	286.78	285.259
1272	285.001	285.492	284.895	285.051	284.101	285.024	285.842	286.704	284.925
1273	284.501	285.275	285.519	285.083	284.26	284.755	285.918	287.037	285.071
1274	285.028	285.201	284.731	284.986	284.979	285.116	285.914	286.909	285.081
1275	284.656	285.153	285.061	285.215	284.756	284.672	285.946	286.825	285.661
1276	284.582	285.029	284.492	284.731	284.712	284.918	284.892	286.452	284.834
1277	284.14	284.438	284.282	284.034	284.814	284.997	284.965	286.266	284.867
1278	284.534	284.635	284.279	284.199	284.814	284.209	285.496	286.537	284.842
1279	285.108	284.876	285.094	284.97	284.84	284.327	285.695	286.698	284.387
1280	285.182	285.102	285.015	284.786	284.818	284.967	286.208	286.465	284.861
1281	285.094	285.299	284.904	285.335	284.747	284.669	285.72	286.785	284.712
1282	284.62	285.566	284.628	285.12	284.659	284.866	285.771	286.93	284.663
1283	284.883	285.615	284.676	285.412	285.129	284.601	286.422	286.923	284.803
1284	285.307	285.487	285.544	285.106	285.071	285.067	286.011	287.351	284.347
1285	285.256	285.431	284.624	285.313	285.502	284.813	286.355	286.752	284.787
1286	283.04	283.861	283.488	284.449	284.012	284.35	285.152	285.703	284.115
1287	284.077	284.474	283.757	283.525	284.318	283.883	285.157	286.071	283.535
1288	284.58	284.738	284.435	284.482	284.092	284.023	285.541	286.458	284.238
1289	284.848	284.891	284.646	284.545	284.857	284.229	285.712	286.682	284.48
1290	284.85	285.047	285.127	284.588	284.608	284.587	286.019	286.997	284.096
1291	284.877	285.218	284.737	285.114	284.825	284.144	285.872	286.824	284.455
1292	285.079	285.276	284.576	284.983	285.048	284.604	286.053	286.717	284.39
1293	284.586	285.109	285.089	285.195	284.719	284.877	286.362	286.859	284.883
1294	284.738	284.896	285.221	284.854	284.711	284.903	285.867	286.896	285.15
1295	284.891	284.773	284.574	285.025	284.56	283.968	285.982	286.856	285.231
1296	284.758	285.088	284.958	284.76	284.864	284.77	285.828	286.772	284.706
1297	285.231	285.244	284.878	285.215	285.085	284.491	286.145	287.043	284.846
1298	285.424	285.174	284.705	284.998	284.762	284.435	285.66	287.52	284.797
1299	285.247	285.58	285.27	285.109	285.46	284.856	286.085	287.029	284.494
1300	284.761	285.045	285.178	284.961	284.636	284.99	286.253	287.211	284.541
1301	284.947	285.174	285.366	285.1	284.71	284.842	285.821	286.565	284.77
1302	284.791	285.509	285.92	285.348	284.526	284.293	285.977	287.32	285.005
1303	285.56	284.971	285.123	285.433	284.621	284.967	286.272	286.489	284.784
1304	285.094	285.283	285.452	284.843	285.13	285.115	286.397	286.905	284.868
1305	285.041	285.019	285.274	285.33	284.772	284.751	285.651	286.98	285.307
1306	285.089	284.981	285.111	285.109	284.527	284.857	286.241	286.505	284.939
1307	285.099	285.178	285.396	285	284.3	284.835	285.93	287.017	284.515
1308	285.634	285.721	285.66	285.392	283.788	284.934	286.016	286.561	284.313
1309	284.678	285.307	284.864	285.096	284.567	284.823	285.711	287.152	284.922
1310	285.382	285.273	285.251	285.443	284.575	284.225	286.343	287.067	284.787
1311	285.337	285.257	285.548	285.15	284.373	284.545	286.066	286.777	285.021
1312	284.915	285.027	285.297	285.282	284.519	285.333	285.828	287.258	284.645
1313	285.279	285.104	285.252	285.173	284.966	284.874	286.318	287.299	284.748
1314	285.161	285.898	285.243	285.402	285.317	284.27	285.714	287.102	284.869
1315	285.202	285.397	285.414	285.595	284.43	285.283	286.309	287.099	285.116
1316	285.381	285.366	284.85	285.173	284.826	284.817	285.932	287.061	285.298
1317	285.215	285.056	285.432	285.226	285.011	284.847	286.091	286.622	285.162
1318	285.907	285.203	284.828	285.113	284.71	284.745	285.826	287.046	284.687
1319	285.304	285.11	284.747	285.224	285.219	284.552	286.188	287.154	285.219
1320	285.416	285.456	284.841	285.413	284.808	284.411	286.046	287.033	285.321
1321	285.317	285.287	285.458	285.218	285.124	285.037	286.179	287.41	285.319
1322	285.586	284.818	285.101	285.195	284.514	284.779	286.134	287.094	284.484
1323	285.427	285.402	285.057	284.935	285.242	284.793	286.074	287.36	284.85
1324	285.734	285.344	285.066	285.254	285.139	284.274	286.301	287.424	285.06
1325	285.599	285.371	285.422	285.086	284.47	284.857	285.991	287.088	285.144
1326	285.277	285.083	285.337	285.294	284.997	284.569	285.558	287.224	285.405
1327	285.268	285.04	285.054	285.359	285.15	284.537	285.982	287.49	284.937
1328	285.747	285.208	284.632	285.361	284.655	284.873	286.108	287.241	285.216
1329	285.514	285.186	285.151	285.038	284.564	284.698	285.672	286.969	284
1330	284.498	284.575	284.125	284.242	284.298	284.367	285.417	287.205	284.663
1331	285.041	284.64	284.808	285.248	284.853	284.181	285.356	286.8	284.521
1332	285.691	285.13	285.64	284.864	285.244	284.786	285.801	287.013	285.041
1333	285.479	284.665	285.202	284.652	284.834	285.152	285.482	287.276	284.609
1334	285.309	285.551	285.105	284.608	285.059	284.752	285.413	287.185	285.283
1335	285.8	285.101	284.987	285.011	284.932	285.127	285.773	287.012	284.813
1336	284.844	284.857	285.49	285.196	284.777	285.109	285.361	286.7	285.098
1337	285.743	285.086	285.154	284.336	285.168	285.3	285.717	287.226	285.278
1338	285.404	285.443	285.331	285.537	284.835	284.978	285.508	286.933	284.897
1339	285.444	285.221	284.69	285.236	284.763	284.719	285.806	287.272	284.485
1340	285.39	285.068	285.01	285.147	284.675	285.131	285.694	287.351	284.499
1341	284.77	284.79	284.646	284.683	284.335	284.946	285.802	287.218	284.662
1342	285.225	284.869	284.896	285.086	285.119	284.833	285.86	287.11	285.02
1343	285.487	285.043	285.169	285.128	284.948	285.508	285.636	287.002	284.863
1344	285.681	285.198	284.762	285.304	284.7	284.411	286.449	287.048	284.761
1345	284.693	283.581	284.081	283.954	283.885	284.365	285.392	286.164	284.41
1346	284.566	284.111	285.199	284.038	283.888	283.906	284.945	285.711	284.803
1347	284.542	284.273	284.786	284.48	284.397	284.788	285.419	286.383	284.508
1348	284.8	284.151	284.997	284.366	284.172	284.304	285.601	286.221	284.552
1349	285.079	284.122	285.254	284.784	284.43	284.221	285.422	286.515	284.791
1350	285.24	284.804	285.503	285.114	284.788	284.509	285.93	286.744	284.785
1351	284.915	285.09	285.096	285.273	284.591	284.476	285.818	287.362	284.567
1352	285.211	284.835	285.536	285.081	284.981	284.748	285.951	286.745	284.986
1353	285.325	284.687	285.208	285.524	284.995	284.67	285.536	286.545	284.361
1354	285.092	284.167	284.997	285.256	285.201	284.548	286.083	286.37	285.287
1355	284.921	284.736	285.345	285.17	284.79	284.518	285.481	286.215	284.49
1356	285.396	285.134	285.486	285.542	285.621	284.933	285.452	286.94	284.895
1357	285.03	284.954	285.492	285.443	285.004	284.788	286.168	286.982	285.072
1358	285.64	285.016	285.465	284.761	284.952	284.63	285.923	287.203	284.727
1359	285.409	284.584	285.824	285.175	285.022	285	285.799	286.896	284.403
1360	285.293	285.532	285.083	285.219	284.622	284.767	285.963	286.648	285.118
1361	285.139	285.248	285.338	285.144	285.347	284.819	285.696	286.92	284.818
1362	285.281	285.005	284.767	285.706	284.909	284.902	285.655	286.999	284.419
1363	284.754	285.256	285.482	284.935	284.818	284.401	285.675	286.881	284.976
1364	284.903	284.627	285.383	285.081	285.274	284.63	285.682	287.124	285.52
1365	285.385	285.101	284.802	285.202	285.041	285.039	285.735	287.142	285.077
1366	285.511	285.333	285.067	285.739	284.865	285.272	286.091	287.447	285.147
1367	285.652	285.634	285.104	285.095	284.702	284.262	286.127	286.899	285.093
1368	285.701	285.035	284.994	284.853	284.777	284.442	285.761	287.076	285.234
1369	285.89	284.55	285.364	285.299	285.522	284.879	285.895	287.176	284.995
1370	284.926	284.864	284.759	285.456	285.016	284.857	285.871	286.959	284.935
1371	285.561	284.618	285.14	285.418	284.59	284.646	285.854	286.559	285.072
1372	285.384	284.273	285.384	285.505	284.967	285.272	286.592	286.927	284.834
1373	285.744	285.088	285.254	285.905	284.88	285.276	285.815	286.684	285.522
1374	285.583	285.012	285.096	285.336	284.662	285.329	285.946	286.96	285.186
1375	285.297	284.784	285.129	285.5	284.594	284.734	285.963	286.743	285.076
1376	285.653	285.303	284.872	285.598	284.884	285.028	285.551	286.668	285.062
1377	285.525	284.845	284.677	285.477	285.325	284.871	286.387	287.119	285.307
1378	284.913	284.795	284.63	285.578	284.564	284.842	286.111	286.915	285.541
1379	285.326	285.105	285.355	285.152	285.105	285.159	286.458	286.754	285.108
1380	285.648	285.651	285.034	285.225	285.074	285.222	286.635	287.083	285.205
1381	286.03	284.478	284.652	284.992	284.617	285.031	285.746	287.051	285.622
1382	284.834	285.165	285.579	285.316	284.712	284.81	285.854	287.01	285.143
1383	285.24	285.041	284.506	285.045	284.696	284.47	286.247	287.04	285.106
1384	285.404	285.337	284.946	284.707	285.01	284.587	285.61	287.203	284.876
1385	284.895	285.077	284.769	285.408	284.715	284.551	285.983	286.55	285.226
1386	284.906	284.878	284.765	285.392	284.61	284.859	285.997	286.827	284.938
1387	285.173	284.999	284.751	285.22	284.91	284.618	286.295	286.631	285.184
1388	285.47	285.153	285.211	285.563	284.822	285.14	285.702	286.792	285.791
1389	284.712	284.878	284.973	285.259	284.648	284.679	285.583	286.704	285.382
1390	284.867	285.14	284.498	285.215	284.573	284.62	285.654	286.821	285.329
1391	284.959	285.158	284.027	284.885	285.2	283.654	285.738	287.221	285.236
1392	285.18	284.985	284.645	284.964	284.888	284.341	286.398	286.76	285.116
1393	285.376	285.225	284.415	285.216	285.421	284.103	285.954	286.85	284.799
1394	285.072	285.308	284.729	284.9	284.654	284.671	285.848	286.752	284.705
1395	285.492	285.549	284.686	285.525	284.859	284.397	285.879	286.743	285.098
1396	285.329	285.475	285.268	285.043	285.09	284.825	286.387	287.14	284.933
1397	285.229	285.157	284.879	285.438	285.419	284.759	285.843	287.165	285.176
1398	285.508	284.863	284.757	285.314	285.06	285.133	285.772	286.938	285.302
1399	285.16	284.946	284.536	285.142	284.822	284.415	286.089	286.63	285.065
1400	284.952	285.113	284.742	285.45	285.313	285.041	285.798	286.654	285.272
1401	285.008	284.888	284.842	285.367	285.067	285.177	285.615	286.909	284.984
1402	285.082	285.384	284.972	285.027	285.228	285.076	285.909	287.079	285.069
1403	285.176	285.238	285.168	285.533	284.585	284.706	285.769	286.887	285.204
1404	285.113	284.939	285.382	285.39	285.143	285.192	286.044	286.782	285.201
1405	285.067	285.123	285.318	285.178	285.151	284.861	286.046	286.699	285.351
1406	285.342	285.03	285.745	285.222	284.96	284.832	286.016	286.665	285.171
1407	285.638	285.26	285.044	285.539	284.187	285.006	285.663	286.431	285.249
1408	285.539	285.138	285.625	285.325	284.377	284.966	285.821	286.993	285.115
1409	285.167	285.532	285.686	285.895	284.765	285.474	285.958	287.059	285.066
1410	285.043	285.263	285.196	285.376	285.088	284.898	286.074	286.944	285.141
1411	285.401	285.34	284.657	285.397	284.782	284.625	285.821	287.19	285.152
1412	285.188	285.408	285.465	285.058	284.782	285.255	286.265	286.937	285.373
1413	285.236	285.703	284.687	285.42	284.802	284.905	286.073	287.28	284.962
1414	284.559	285.999	285.864	285.462	284.485	284.764	285.774	287.007	285.175
1415	285.034	285.382	285.268	285.201	284.44	284.944	286.119	286.836	285.238
1416	285.605	285.038	285.32	285.058	284.927	284.486	286.255	287.029	285.173
1417	285.474	285.311	285.396	285.194	284.809	284.993	286.135	286.851	285.228
1418	285.11	285.548	285.35	284.938	285.345	285.294	285.862	287.101	284.913
1419	285.166	286.043	285.26	285.578	285.007	284.85	285.663	286.628	285.326
1420	285.344	285.318	285.542	285.288	284.648	285.189	286.275	286.766	285.13
1421	285.601	285.483	285.335	285.264	284.709	285.507	286.152	286.648	284.599
1422	285.779	285.216	285.186	285.579	284.998	284.903	285.667	287.184	284.966
1423	285.36	285.678	285.342	285.225	284.895	284.93	285.872	287.059	285.144
1424	285.308	285.557	285.063	285.779	284.561	284.972	285.783	286.949	284.942
1425	285.648	285.931	284.802	285.107	284.874	284.73	286.223	287.129	284.761
1426	285.32	285.502	285.463	285.42	284.66	284.615	286.11	286.819	284.732
1427	285.107	285.129	285.318	285.832	284.687	285.159	286.013	286.799	284.989
1428	285.239	286.044	285.289	285.872	284.671	284.779	286.492	287.397	284.412
1429	285.348	285.814	285.612	285.526	284.752	284.897	285.607	287.409	284.623
1430	285.355	284.913	285.393	285.337	284.539	284.937	286.322	287.21	284.412
1431	285.437	285.268	285.105	285.382	284.989	284.849	285.914	287.396	285.083
1432	285.581	285.211	285.235	285.861	284.74	284.823	286.227	287.172	284.856
1433	285.686	285.43	285.896	285.618	285.034	285.021	286.051	286.985	285.015
1434	285.39	285.311	285.39	285.694	285.009	284.527	285.884	287.116	285.132
1435	285.44	284.942	285.408	285.834	284.885	285.3	285.818	287.034	285.236
1436	285.628	285.349	285.442	285.906	284.82	284.966	286.521	286.978	285.282
1437	285.459	285.449	285.327	285.811	284.797	284.714	286.033	287.473	284.408
1438	285.69	285.397	285.249	286.054	285.262	284.764	285.86	287.134	284.726
1439	285.542	285.366	284.737	285.38	284.866	284.87	286.239	287.31	285.433
1440	285.436	285.622	285.221	285.703	285.056	284.116	286.423	286.957	284.715
1441	285.283	285.331	285.011	285.375	285.125	284.33	285.683	287.435	284.741
1442	285.059	285.462	284.859	285.544	284.716	284.28	286.186	287.171	284.733
1443	285.551	285.11	285.022	285.766	285.137	284.75	285.637	287.218	284.39
1444	285.837	285.541	285.11	285.697	285.124	284.644	286.072	286.85	284.317
1445	285.553	284.963	285.194	285.256	284.927	284.484	285.691	286.794	285.151
1446	285.057	284.885	285.769	285.827	284.685	284.523	285.667	286.915	285.03
1447	285.511	285.257	285.419	285.435	285.011	285.417	285.633	286.995	284.988
1448	285.346	285.167	285.667	285.467	285.297	284.976	285.959	286.907	284.691
1449	285.576	285.811	285.517	285.539	284.977	285.217	285.82	287.052	285.183
1450	284.939	285.198	285.1	285.375	284.757	284.863	286.414	287.041	284.623
1451	284.704	284.875	285.219	285.244	284.431	284.746	285.609	286.882	284.427
1452	285.265	285.366	285.283	285.397	284.645	285.046	286.082	286.764	284.535
1453	285.295	285.245	285.428	285.479	284.512	284.411	285.613	285.812	284.666
1454	284.118	284.419	284.811	283.903	283.7	283.779	285.205	286.527	284.323
1455	284.955	284.578	284.534	284.165	284.526	284.858	285.434	286.899	284.038
1456	284.862	284.818	285.265	284.591	284.431	284.41	285.649	286.42	284.898
1457	284.61	284.701	285.029	284.783	284.431	284.964	285.889	286.935	284.211
1458	285.711	285.468	285.407	285.311	283.175	283.44	283.976	285.097	283.591
1459	284.023	283.627	283.605	282.628	283.169	283.425	284.153	284.779	282.992
1460	284.745	284.612	284.13	282.997	283.436	283.681	284.913	285.724	283.575
1461	284.746	285.23	284.749	284.125	283.783	284.372	285.536	286.113	284.245
1462	284.638	284.686	284.674	284.616	284.309	284.16	285.651	286.029	283.937
1463	284.796	284.954	284.74	284.758	284.176	283.926	285.412	286.169	284.561
1464	284.624	285.235	285.204	285.053	284.373	284.29	285.666	286.499	284.378
1465	284.935	285.115	284.886	284.665	283.976	284.333	285.872	286.469	284.646
1466	284.997	284.916	284.846	284.8	284.566	284.924	286.213	286.882	284.307
1467	284.678	285.09	285.311	284.942	284.18	284.618	285.591	286.831	283.694
1468	284.874	285.558	284.977	285	284.129	284.794	286.277	286.599	284.547
1469	285.192	285.468	285.654	285.308	284.731	285.032	286.098	286.466	284.037
1470	285.074	284.577	285.131	285.025	284.083	284.298	286.464	286.932	284.181
1471	284.721	285.36	284.924	285.164	284.357	284.373	286.337	287	284.436
1472	284.845	285.387	285.438	285.639	284.613	285.22	285.933	287.099	284.39
1473	284.93	285.545	285.221	285.228	284.475	284.782	285.871	286.661	284.058
1474	285.536	285.797	284.982	284.967	285.132	284.248	286.052	286.783	284.635
1475	285.059	285.255	284.967	285.77	285.181	284.738	286.077	287.23	284.519
1476	285.602	285.197	285.599	285.795	285.342	284.714	286.475	287.021	284.659
1477	284.035	284.525	284.257	284.282	284.412	283.281	285.463	286.949	283.859
1478	284.518	285.126	284.364	284.735	284.46	284.034	285.967	286.702	284.106
1479	284.889	285.574	285.407	285.262	284.067	284.686	285.725	286.649	284.96
1480	285.149	285.255	284.943	284.778	284.358	284.148	286.079	287.021	284.039
1481	284.12	284.825	284.371	285.082	284.389	284.484	286.265	286.87	284.038
1482	285.04	284.968	284.689	285.696	284.776	284.333	285.839	286.254	284.547
1483	285.187	284.832	285.416	285.44	284.812	284.786	286.14	286.563	284.748
1484	284.714	285.067	285.696	285.21	284.381	284.962	286.049	286.81	284.492
1485	285.115	285.22	285.938	285.104	285.067	285.332	286.241	286.694	284.359
1486	284.982	285.254	285.694	285.737	285.256	284.765	285.813	287.028	284.052
1487	285.048	285.329	285.535	285.736	284.644	284.932	286.371	286.693	284.371
1488	285.544	285.697	285.391	285.37	284.961	284.617	286.112	286.889	284.22
1489	285.395	285.402	285.313	285.494	284.719	285.274	285.902	287.157	284.675
1490	285.486	285.503	284.675	285.433	284.694	285.749	286.064	287.123	284.572
1491	285.098	284.948	285.103	285.733	285.115	285.371	285.995	286.946	283.876
1492	285.22	285.566	285.503	285.759	284.757	285.014	285.826	287.077	284.16
1493	285.485	285.898	285.364	285.702	284.596	284.895	285.974	287.063	284.028
1494	285.191	285.259	285.345	285.156	284.793	285.085	285.827	287.668	284.377
1495	285.886	285.596	285.014	285.52	284.682	285.009	285.946	287.232	285.162
1496	285.637	285.514	285.393	285.889	284.562	284.625	285.724	287.146	285.12
1497	285.179	285.268	286.021	286.013	285.467	284.846	285.94	286.812	284.576
1498	285.331	285.049	285.375	286.045	285.235	284.919	285.879	287.121	285.224
1499	285.132	285.224	285.638	285.606	285.082	285.327	286.077	287.108	285.206
1500	285.009	285.206	285.661	285.766	284.612	285.325	285.556	286.804	284.707
1501	285.193	285.122	285.938	285.515	284.675	284.758	286.481	286.979	284.849
1502	284.551	284.827	285.242	285.411	284.455	284.555	285.587	286.878	284.893
1503	284.648	285.045	285.316	285.716	284.863	284.66	285.574	287.028	284.725
1504	284.944	285.264	285.339	285.54	284.626	284.994	285.621	287.245	284.684
1505	285.051	285.382	285.49	285.821	284.981	284.658	285.748	286.662	284.683
1506	285.391	284.993	285.315	285.716	284.873	285.139	285.852	286.842	285.622
1507	285.2	285.106	284.924	285.759	284.699	284.832	286.043	286.906	284.811
1508	285.139	285.441	285.5	286.183	285.081	285.302	285.907	287.109	284.573
1509	284.934	285.757	285.286	285.424	285.01	284.979	285.756	287.005	285.054
1510	285.301	285.195	285.418	285.901	284.523	285.147	285.245	287.065	285.104
1511	284.932	285.202	284.937	285.253	284.522	284.789	285.544	285.614	284.801
1512	285.264	285.703	285.389	285.724	284.711	284.754	285.913	286.465	284.904
1513	285.358	285.278	285.082	285.393	283.741	284.663	285.527	286.677	285.202
1514	284.824	285.113	285.434	285.702	284.645	285.192	286.031	286.887	285.067
1515	285.617	285.55	285.197	285.809	284.355	284.667	286.336	286.949	285.183
1516	284.5	285.385	284.756	285.643	284.837	284.926	285.819	286.738	285.26
1517	285.174	285.769	284.861	285.443	284.988	284.534	286.001	286.998	285.031
1518	285.292	285.365	285.15	285.997	284.393	284.535	285.826	287.093	284.878
1519	285.358	284.986	285.317	285.472	284.728	284.826	286.004	286.609	284.444
1520	285.27	285.739	285.22	285.76	284.897	284.658	286.073	287.265	285.063
1521	284.642	285.43	284.76	285.447	284.987	284.913	285.855	287.201	284.573
1522	285.462	285.038	285.011	285.888	285.126	284.792	285.883	287.015	285.361
1523	285.59	285.498	285.35	285.206	284.985	284.501	286.178	286.814	285.35
1524	285.331	285.604	285.44	285.533	284.936	284.891	286.03	286.805	285.107
1525	285.608	285.771	285	285.413	284.621	284.693	285.969	286.939	285.032
1526	285.269	285.344	285.205	285.63	284.496	284.692	285.837	286.987	284.636
1527	285.57	284.932	285.649	285.322	284.574	284.863	285.409	287.034	285.1
1528	285.166	284.95	285.081	285.238	284.872	284.639	286.134	286.885	284.855
1529	285.528	285.028	285.057	285.529	285.169	285.165	286.161	287.058	284.601
1530	285.523	284.97	285.576	285.693	284.93	284.652	285.64	287.145	284.676
1531	285.199	285.633	285.748	285.494	285.124	285.165	285.824	286.853	284.905
1532	285.177	285.393	285.906	285.44	284.934	285.35	285.962	286.846	285.032
1533	284.762	285.201	285.167	285.91	285.007	285.275	285.999	287.094	285.269
1534	284.888	284.988	285.403	285.822	284.945	285.277	285.961	287.27	284.809
1535	284.678	285.222	285.826	285.507	285.214	284.967	286.087	287.032	285.418
1536	285.319	285.687	286.108	286.345	284.82	284.949	286.63	287.231	285.063
1537	285.011	284.959	286.171	285.507	284.972	284.86	286.179	287.28	284.874
1538	284.835	285.504	285.745	285.254	285.058	285.6	286.469	287.151	284.781
1539	285.362	285.499	285.834	285.365	284.627	284.381	286.121	286.826	285.384
1540	284.98	285.499	285.858	286.291	284.184	284.798	286.11	287.04	285.018
1541	285.789	285.565	285.886	285.927	284.867	285.019	286.479	286.887	285.108
1542	285.166	285.655	285.38	285.618	285.197	285.255	286.436	287.026	285.064
1543	285.068	285.631	285.674	285.811	285.03	284.903	286.425	286.988	285.136
1544	285.229	285.636	285.639	285.491	284.942	284.811	286.243	287.194	284.622
1545	285.117	285.73	285.333	285.515	285.096	285.091	285.861	287.316	284.696
1546	285.274	285.989	285.505	285.954	285.275	284.932	286.114	287.175	285.447
1547	285.709	285.541	285.313	285.43	285.392	285.39	285.745	286.948	285.173
1548	285.057	285.486	285.507	285.945	285.075	285.508	285.78	286.813	285.121
1549	286.051	285.152	285.422	286.153	284.904	284.785	285.364	286.87	284.906
1550	285.551	284.894	285.337	285.693	285.473	284.564	285.685	287.288	285.209
1551	285.631	285.36	285.56	286.257	284.42	284.83	286.37	287.538	284.532
1552	285.278	285.463	285.587	285.955	284.918	285.024	285.985	286.904	284.735
1553	285.565	285.329	285.135	285.657	285.01	285.375	286.12	287.203	284.729
1554	285.182	285.051	285.331	285.923	284.531	285.002	286.178	286.914	284.82
1555	285.336	285.407	284.636	285.373	284.683	284.854	286.138	287.541	284.67
1556	285.014	285.488	285.646	285.417	284.87	284.595	286.17	287.154	285.079
1557	285.734	285.888	285.319	285.68	285.014	284.701	286.31	287.075	285.255
1558	285.429	285.403	285.182	285.51	284.944	285.122	286.38	286.749	284.508
1559	286.162	285.297	285.161	285.515	284.968	284.392	286.163	287.225	285.224
1560	285.774	285.338	285.223	285.686	284.807	284.241	286.004	287.051	285.164
1561	285.422	285.528	285.079	285.385	284.774	284.621	286.002	287.159	285.246
1562	285.551	285.111	285.33	285.96	284.778	284.51	285.944	287.055	285.046
1563	285.535	285.907	285.173	285.77	284.868	285.02	286.211	286.686	284.929
1564	285.189	285.413	285.622	286.254	285.39	285.231	285.98	286.955	284.976
1565	285.5	284.96	285.728	285.673	285.012	285.221	286.003	287.174	284.586
1566	285.336	285.523	285.429	285.758	284.844	285.113	285.671	286.912	284.764
1567	285.544	285.31	285.29	285.643	284.794	284.944	285.385	286.944	284.629
1568	285.042	284.925	284.887	285.312	284.497	285.092	286.428	286.887	285.043
1569	285.258	285.291	284.923	285.938	285.109	284.826	285.869	287.588	284.759
1570	285.506	285.066	284.706	286.032	284.797	284.732	286.136	286.688	284.159
1571	285.411	285.228	285.298	285.725	284.877	284.833	285.669	286.881	284.887
1572	285.321	285.117	285.014	285.953	284.624	284.813	285.85	286.917	285.21
1573	284.972	285.079	284.754	286.017	284.093	284.687	286.085	286.905	284.574
1574	285.155	285.818	285.439	286.007	284.772	285.056	286.096	287.11	284.679
1575	285.775	285.211	284.79	286.514	284.246	285.032	286.396	286.845	284.843
1576	285.074	285.376	285.412	286.152	284.603	284.984	286.069	286.553	284.615
1577	285.215	285.398	285.416	285.942	284.955	284.697	286.145	286.845	284.891
1578	285.269	285.593	284.909	285.992	284.729	285.31	286.092	286.719	284.739
1579	285.559	285.235	285.177	286.158	284.529	284.833	286.433	286.864	284.406
1580	285.704	285.483	285.492	285.916	284.574	284.614	285.752	287.083	284.876
1581	285.632	285.259	285.778	285.858	285.084	284.392	286.008	287.037	284.938
1582	285.617	285.332	285.109	285.631	284.575	284.982	286.307	286.62	284.313
1583	285.633	284.818	285.408	285.642	284.862	285.254	285.911	287.013	284.367
1584	285.304	285.346	285.616	285.692	284.777	285.073	286.299	286.457	284.497
1585	284.299	283.88	283.768	285.162	284.355	284.712	284.824	286.159	284.341
1586	284.536	284.221	283.643	284.276	284.113	284.614	285.448	286.689	284.031
1587	285.467	284.766	285.118	285.541	284.485	284.457	285.384	286.616	284.386
1588	285.463	284.827	285.134	285.481	284.149	284.855	285.454	286.79	284.487
1589	285.184	285.554	284.787	285.648	284.671	285.206	286.338	287.308	284.275
1590	285.008	285.106	285.089	285.66	284.914	284.807	285.512	286.92	283.894
1591	285.109	285.376	285.208	285.587	284.468	285.02	285.641	286.865	284.668
1592	285.663	285.398	285.339	285.54	284.68	284.903	285.693	286.899	284.488
1593	285.175	285.145	285.383	286.153	284.711	284.521	285.466	287.017	284.669
1594	285.359	285.096	285.425	285.478	284.962	284.862	285.46	286.592	283.821
1595	284.263	284.709	284.843	285.118	285.286	284.789	285.276	286.513	284.084
1596	284.879	284.438	285.073	284.891	284.515	284.474	284.716	286.062	284.297
1597	284.517	284.778	285.136	284.925	284.636	284.541	285.012	286.406	284.125
1598	285.037	284.608	285.404	284.921	284.745	284.784	286.046	286.652	284.432
1599	285.103	285.188	285.359	285.382	284.638	284.962	285.898	287.065	284.22
1600	285.419	285.475	284.957	285.655	284.732	284.196	285.715	285.223	283.871
1601	285.106	285.502	285.176	284.591	283.762	284.107	285.035	285.868	283.684
1602	284.772	285.233	285.043	284.8	284.598	283.817	285.85	286.691	284.128
1603	285.417	285.331	284.95	285.332	284.515	284.597	285.263	286.56	283.937
1604	285.388	284.986	285.513	285.325	284.256	284.356	285.44	286.724	283.723
1605	285.681	285.223	285.718	285.221	284.267	284.594	285.735	287.001	284.002
1606	285.596	284.779	285.061	285.453	284.892	284.743	285.473	286.927	283.887
1607	285.303	285.189	285.423	285.531	284.297	284.149	285.605	286.986	284.304
1608	285.388	285.577	285.907	285.493	284.502	284.374	285.938	286.598	283.958
1609	285.555	285.252	285.211	285.575	284.676	284.918	285.805	286.483	284.237
1610	285.973	284.767	285.503	285.968	284.933	284.939	285.636	286.658	285.329
1611	285.409	284.822	285.17	285.977	284.563	285.036	286.117	286.673	284.029
1612	285.268	284.817	285.488	285.562	284.686	284.57	286.011	286.63	284.399
1613	285.83	285.326	285.661	285.974	284.568	284.921	285.94	286.569	284.765
1614	285.634	285.501	285.442	285.837	284.531	284.929	285.812	286.549	284.409
1615	285.596	284.433	285.899	285.726	284.763	284.721	285.681	286.43	284.305
1616	284.98	285.268	285.479	285.936	284.809	284.831	285.881	286.633	284.445
1617	285.39	285.262	285.467	285.448	284.889	284.486	286.038	286.833	284.615
1618	285.398	285.36	285.582	285.993	284.882	284.721	285.669	286.787	284.222
1619	285.247	285.021	285.382	285.359	284.352	284.673	285.967	286.925	284.007
1620	285.466	285.107	285.293	286.29	284.541	284.965	285.791	287.107	283.897
1621	285.375	285.613	285.289	285.587	284.825	284.844	285.701	286.846	283.991
1622	285.163	285.666	285.177	286.135	284.455	284.591	285.813	287.149	284.57
1623	285.994	284.988	285.456	285.951	284.651	284.844	285.891	286.783	284.24
1624	286.047	285.233	285.352	285.623	285.068	284.756	285.943	286.928	284.22
1625	285.227	285.27	285.709	286.124	285.205	285.09	285.978	286.905	284.036
1626	285.94	285.745	284.977	285.924	284.85	284.643	285.913	287.148	284.175
1627	285.721	285.174	285.064	285.52	285.281	284.906	285.876	287.036	284.256
1628	285.542	285.402	285.453	286.328	285.374	284.863	285.622	286.974	284.484
1629	285.244	285.254	285.57	285.841	284.908	284.22	285.173	286.963	284.256
1630	285.349	285.553	285.2	285.8	284.935	284.905	285.928	287.25	284.374
1631	285.512	285.043	285.419	285.82	284.729	284.841	285.98	286.88	284.055
1632	285.186	284.905	285.999	286.396	284.809	284.511	286.142	286.997	284.195
1633	285.176	285.467	284.932	286.175	284.763	284.44	285.784	287.237	284.74
1634	285.018	284.481	285.377	285.841	284.755	284.808	285.634	286.905	284.522
1635	285.37	285.512	285.422	285.806	285.024	284.406	286.219	287.003	284.638
1636	285.334	285.372	285.627	286.187	284.796	284.744	285.75	287.088	284.573
1637	285.575	285.155	285.369	285.655	284.806	284.298	286.273	287.135	284.123
1638	284.948	284.698	285.075	285.555	284.529	284.721	286.102	286.946	284.358
1639	285.222	284.845	285.024	285.496	283.957	284.785	286.256	286.787	284.36
1640	285.934	284.865	285.684	285.805	284.699	284.323	285.996	286.471	284.484
1641	283.358	283.228	283.631	282.939	284.017	283.886	284.556	284.78	283.993
1642	284.478	284.08	283.994	283.891	283.796	283.708	284.874	285.969	283.223
1643	284.968	284.804	284.647	285.006	284.344	284.479	284.945	286.365	284.284
1644	285.446	284.695	284.927	285.354	284.255	284.029	286.202	286.615	284.1
1645	285.308	285.494	284.61	285.508	284.757	284.562	285.634	286.621	283.975
1646	284.635	284.157	284.004	285.329	284.643	284.544	285.789	286.648	283.884
1647	284.826	284.328	284.684	285.271	284.092	284.465	285.602	286.505	283.447
1648	284.654	285.345	284.658	285.7	284.213	284.438	285.97	286.315	283.835
1649	284.692	285.227	284.724	285.624	285.193	284.452	285.653	286.875	284.062
1650	285.268	285.041	284.777	285.309	285.005	284.496	285.928	287.191	283.906
1651	284.894	284.744	284.663	285.428	284.686	284.183	286.135	286.87	284.074
1652	285.067	285.313	285.272	285.612	285.134	285.131	286.112	286.828	284.615
1653	285.316	285.416	285.215	285.872	284.956	285.065	285.737	287.07	283.856
1654	285.357	285.114	284.934	285.719	284.794	284.632	285.414	286.988	283.486
1655	285.115	284.722	284.453	285.318	284.286	284.824	285.833	286.88	284.265
1656	285.163	285.376	284.69	285.58	285.1	284.365	286.297	286.964	283.891
1657	285.927	285.013	285.036	285.857	283.964	284.608	285.91	286.712	284.048
1658	284.792	284.887	285.389	285.856	284.861	284.651	285.619	287.276	284.343
1659	285.147	285.119	284.889	285.816	284.791	284.862	285.977	286.868	284.446
1660	285.207	284.774	285.227	285.753	284.701	284.727	286.04	286.71	284.184
1661	285.209	285.024	285.219	285.602	284.598	284.358	285.85	286.938	284.349
1662	285.081	284.654	284.904	285.879	284.934	284.477	285.576	287.052	284.169
1663	284.765	285.192	284.93	286.025	284.433	284.49	285.658	286.796	284.297
1664	285.688	285.341	285.083	286.105	284.867	284.222	285.717	287	284.475
1665	285.472	284.818	285.037	285.968	284.727	284.238	286.363	286.931	283.882
1666	285.346	284.784	285.104	286.296	284.939	284.329	285.932	287.266	284.557
1667	285.701	284.777	284.978	285.86	285.073	285.09	286.069	286.866	284.661
1668	284.671	284.648	284.759	285.677	284.788	284.594	286.109	287.085	283.96
1669	284.643	285.042	285.427	285.956	284.693	284.321	286.459	286.817	284.151
1670	284.656	284.72	285.046	285.769	284.528	284.997	286.061	286.993	283.759
1671	285.141	284.83	285.108	286.024	284.02	284.758	285.601	286.528	283.784
1672	285.195	285.471	285.215	285.713	284.607	284.883	285.896	286.301	284.138
1673	284.726	284.939	284.98	286.292	284.815	284.886	286.23	286.8	284.473
1674	284.824	284.837	284.79	285.534	284.613	284.581	285.65	286.408	284.179
1675	284.329	284.802	285.08	285.535	284.856	284.612	285.457	286.173	284.676
1676	284.966	284.845	285.103	285.499	284.037	284.677	285.969	286.433	284.533
1677	285.048	285.134	285.008	286.215	284.691	285.063	286.044	287.045	284.46
1678	284.457	284.966	284.885	285.743	284.905	285.114	285.413	287.456	284.937
1679	284.883	285.026	284.648	285.276	284.541	285.233	285.85	286.859	284.345
1680	285.167	284.69	285.318	285.816	284.471	285.122	285.832	286.848	284.977
1681	284.973	284.398	285.436	285.669	284.987	284.628	285.706	287.234	284.41
1682	285.033	284.631	285.296	285.669	284.528	284.916	286.127	287.214	284.637
1683	285.323	285.064	284.973	285.787	284.949	284.913	285.862	286.7	284.827
1684	285.283	285.062	285.106	285.726	284.542	285.227	285.836	286.74	284.92
1685	285.162	285.252	285.117	285.476	284.324	285.101	285.82	286.727	284.789
1686	285.192	285.357	285.409	285.785	284.415	284.107	285.288	286.782	284.433
1687	285.694	285.118	285.66	285.904	284.368	284.321	285.82	287.198	284.615
1688	285.528	285.328	285.089	286.597	285.064	284.783	285.966	286.869	284.399
1689	285.412	284.866	285.371	286.28	284.718	284.575	285.73	286.981	284.21
1690	285.224	284.941	285.251	285.855	285.314	284.769	286.027	286.583	284.601
1691	285.379	284.921	285.227	285.995	284.753	284.599	286.098	286.764	284.294
1692	285.374	285.509	285.502	285.72	284.972	284.335	285.8	286.773	285.156
1693	285.281	285.103	285.354	285.878	284.477	284.602	285.828	286.559	284.662
1694	284.987	284.945	284.436	285.592	284.982	284.721	285.309	286.401	284.286
1695	283.721	284.598	283.916	285.447	284.218	284.334	285.305	285.661	284.454
1696	284.829		284.251	284.876	283.629	284.495	284.904	285.538	283.962
1697	284.972	284.863	284.955	284.985	284.979	284.398	285.04	286.312	283.818
1698	284.834	284.621	284.528	285.809	284.427	284.657	285.684	286.448	284.44
1699	285.228	284.586	284.632	285.885	284.303	284.454	285.858	286.737	284.623
1700	284.879	284.59	285.367	285.659	285.209	285.012	285.823	286.662	284.441
1701	285.448	284.871	285.632	285.38	284.699	284.633	285.983	286.819	284.342
1702	284.778	285.164	285.017	285.886	285.04	285.017	285.634	286.713	284.452
1703	285.16	284.571	284.785	286.072	284.335	284.856	285.75	286.436	284.331
1704	284.903	284.657	284.89	286.559	284.635	284.783	286.078	286.909	284.334
1705	284.541	284.65	284.744	285.981	284.283	284.777	285.623	286.949	284.605
1706	285.315	284.201	284.797	285.942	284.067	284.96	285.732	287.157	284.617
1707	284.501	284.628	284.781	286.231	284.418	284.609	286.016	287.069	284.732
1708	284.675	285.092	284.98	285.978	284.294	284.833	285.793	287.201	284.992
1709	285.09	285.098	285.492	285.962	284.17	284.407	285.849	287.079	285.06
1710	284.596	285.508	285.129	286.051	284.757	284.798	285.861	287.108	284.328
1711	285.067	284.799	285.199	285.848	283.973	284.734	285.901	287.052	284.885
1712	284.696	285.223	285.175	285.68	284.55	284.663	285.795	286.783	284.824
1713	285.223	284.959	285.14	285.776	285.037	284.976	285.432	286.947	284.41
1714	284.787	285.092	285.283	286.038	284.649	284.496	286.002	287.564	284.743
1715	284.481	285.139	285.133	286.409	284.697	284.559	285.802	286.872	284.832
1716	285.591	285.165	285.067	286.455	285.151	284.455	285.955	287.404	284.966
1717	284.997	285.515	285.044	285.921	283.946	284.191	285.517	287.028	284.755
1718	284.944	285.159	285.369	285.98	284.675	284.188	285.419	286.828	284.627
1719	285.207	285.354	285.585	286.25	284.578	284.758	285.423	286.799	284.891
1720	285.398	285.145	285.431	286.088	284.559	284.552	285.769	286.766	284.511
1721	284.756	285.133	285.083	286.028	284.64	284.642	285.883	287.315	284.314
1722	284.467	284.745	285.244	285.958	284.813	284.334	285.944	287.32	284.647
1723	284.628	284.778	285.031	285.921	284.865	284.358	285.49	286.869	284.523
1724	284.688	285.385	285.381	285.779	284.892	284.22	285.813	286.63	284.864
1725	284.967	285.14	285.472	286.013	284.954	284.735	285.832	287.062	284.355
1726	285.163	285.399	285.106	286.373	284.671	284.952	285.121	286.639	284.162
1727	284.685	285.462	285.153	285.842	284.357	284.825	285.428	286.947	285.185
1728	284.969	285.297	285.811	286.32	284.876	284.482	286.246	286.848	284.423
1729	283.856	284.111	284.397	284.741	284.152	283.676	285.032	287.271	283.389
1730	284.174	284.508	284.954	285.255	284.788	284.151	285.396	286.756	283.847
1731	284.226	285.178	284.68	285.791	284.276	284.15	285.858	286.622	283.819
1732	284.339	284.744	285.466	285.871	284.498	284.787	285.886	286.973	283.985
1733	284.417	284.868	285.139	285.829	284.535	284.749	285.404	287.097	283.932
1734	284.844	285.003	286.061	285.795	284.422	285.032	285.762	287.143	283.952
1735	284.843	284.709	285.749	285.842	284.414	284.629	285.886	286.681	284.315
1736	284.528	284.686	285.659	286.051	284.492	284.242	285.981	286.801	284.593
1737	284.752	285.048	285.585	285.946	284.414	284.579	286.014	286.441	284.845
1738	285.118	285.324	284.96	285.723	284.199	284.979	285.826	287.078	284.657
1739	284.64	285.026	284.84	285.928	285.295	285.046	285.89	287.052	284.082
1740	284.766	285.105	284.792	285.754	284.5	284.311	285.625	287.103	283.796
1741	285.012	285.216	284.585	285.799	284.909	284.394	285.602	286.635	284.188
1742	285.09	285.58	285.21	286.181	285.014	285.04	285.919	287.397	284.382
1743	284.974	285.08	285.261	286.374	284.421	284.786	285.646	287.433	284.467
1744	285.133	285.12	285.282	286.484	284.519	285.226	285.931	287.15	284.647
1745	284.685	285.341	285.608	286.065	284.826	285.112	285.858	287.282	284.332
1746	285.234	285.031	285.099	286.244	284.575	285.022	286.048	286.865	284.337
1747	284.974	284.842	285.341	285.972	284.613	285.007	286.019	286.823	284.146
1748	285.101	284.842	284.904	286.08	285.355	285.295	286.063	287.239	284.922
1749	285.488	285.136	285.545	286.521	284.756	285.186	286.456	287.475	284.29
1750	285.094	284.809	285.361	285.746	285.262	285.496	286.186	287.642	284.589
1751	284.987	285.226	285.274	285.769	285.058	284.475	285.88	287.512	284.704
1752	285.643	284.966	285.251	285.615	284.951	284.833	286.2	287.113	284.343
1753	285.054	284.803	285.476	285.597	284.826	284.716	286.207	286.78	284.96
1754	285.168	285.303	285.34	285.582	284.543	284.779	286.196	286.85	285.339
1755	284.801	284.787	284.906	285.943	284.623	284.574	286.725	286.867	284.408
1756	285.136	285.237	285.178	285.145	284.809	285.271	286.219	286.973	284.634
1757	285.066	285.435	285.745	285.512	284.434	284.774	285.583	286.819	284.029
1758	285.101	284.717	284.926	285.792	284.847	284.205	285.818	287.089	284.501
1759	285.566	284.595	285.316	285.319	284.636	284.444	285.962	286.515	284.522
1760	285.729	284.876	285.187	284.974	284.563	284.727	285.614	286.809	284.553
1761	285.444	285.182	285.32	285.529	284.735	284.813	286.124	287.273	284.297
1762	285.028	285.149	284.949	285.404	284.87	284.464	285.624	286.922	284.458
1763	284.784	284.549	284.455	284.962	284.871	284.387	285.683	286.862	284.286
1764	285.44	285.244	285.636	285.119	284.816	284.654	285.872	286.922	284.694
1765	284.959	284.915	285.091	285.289	284.546	284.876	285.947	286.741	284.941
1766	284.675	284.807	284.343	284.113	284.844	284.614	285.784	286.936	284.98
1767	284.616	285.222	284.83	284.971	284.985	284.495	286.317	287.1	284.322
1768	285.245	284.732	285.163	285.025	284.72	284.242	286.028	287.363	284.635
1769	285.264	284.968	285.476	285.167	284.977	284.104	285.765	287.488	284.439
1770	285.337	284.971	284.959	285.128	283.953	284.454	285.774	287.204	284.681
1771	285.235	285.085	284.681	285.181	285.198	284.02	286.083	287.046	284.943
1772	284.88	284.888	285.119	285.536	285.065	284.335	286.116	286.876	284.789
1773	285.102	285.261	285.249	285.467	285.043	284.65	286.49	287.318	285.161
1774	285.264	285.141	284.872	285.403	285.041	284.686	285.804	287.099	284.701
1775	285.086	285.151	285.26	285.385	284.611	284.504	286.088	287.241	284.104
1776	285.521	285.074	284.835	285.649	284.682	284.654	286.04	287.373	284.598
1777	285.32	285.046	285.555	285.349	284.909	284.958	286.462	287.406	285
1778	285.431	285.355	285.435	285.069	284.822	285.027	285.819	287.155	284.733
1779	285.148	284.699	285.674	285.165	284.993	284.864	286.321	287.251	284.476
1780	285.726	285.432	285.045	285.595	284.67	284.856	285.952	287.231	285.039
1781	284.832	285.252	285.677	285.338	284.685	285.004	286.08	287.218	284.908
1782	285.337	285.544	285.207	285.606	285.086	284.837	286.008	287.16	284.978
1783	283.312	283.347	282.646	284.292	284.246	284.052	285.023	287.085	283.813
1784	284.457	284.882	284.465	284.844	282.672	282.937	284.269	286.861	282.955
1785	284.693	285.039	284.444	284.861	283.547	283.442	285.465	287.024	283.998
1786	284.942	285.34	284.519	284.554	284.467	284.83	285.829	287.151	284.462
1787	284.569	285.031	284.378	284.825	284.188	284.198	286.119	287.155	283.883
1788	284.786	285.273	284.93	285.176	284.39	284.058	285.757	286.729	284.342
1789	285.503	285.371	285.597	285.395	284.723	285.168	286.009	287.014	284.343
1790	284.856	285.128	285.424	285.003	284.657	284.869	286.289	287.333	283.663
1791	285.495	285.397	285.058	285.344	284.762	284.603	285.802	287.239	284.074
1792	285.173	285.575	285.172	285.325	284.898	284.858	285.912	287.216	284.275
1793	284.89	285.603	285.363	285.304	284.675	284.791	286.204	287.166	284.509
1794	284.929	285.258	284.689	285.763	284.648	285.045	286.386	287.256	284.945
1795	285.302	285.074	285.412	285.63	284.735	285.074	286.106	287.083	283.988
1796	285.065	285.261	285.487	285.31	285.267	285.128	286.276	286.981	283.856
1797	285.13	285.181	284.873	285.144	284.71	285.055	285.534	286.965	284.485
1798	284.592	285.141	284.719	285.031	285.05	284.602	286.112	287.285	283.792
1799	284.812	284.801	284.832	285.063	284.67	284.717	285.809	286.808	284.738
1800	284.997	285.259	285.035	285.608	284.782	284.885	286.194	286.49	284.531
1801	285.464	284.885	284.873	285.33	284.808	285.546	285.676	286.731	284.55
1802	284.565	285.317	285.338	285.435	285.102	285.342	285.973	286.924	285.04
1803	285.018	285.246	285.339	285.701	285.09	285.472	285.926	287.465	284.655
1804	285.514	284.993	284.598	285.295	284.753	285.219	286.164	286.918	284.667
1805	285.28	285.462	285.356	285.931	284.589	285.086	285.774	287.254	284.725
1806	285.068	285.827	284.9	285.333	285.177	285.247	285.587	287.272	284.983
1807	285.283	285.357	285.115	285.415	285.109	285.254	285.578	286.947	284.569
1808	285.028	285.385	284.971	285.576	285.326	285.248	285.985	286.747	284.647
1809	285.493	285.281	284.96	285.108	284.352	284.733	285.4	286.138	284.213
1810	283.563	283.803	283.266	283.792	283.923	283.573	285.177	285.519	283.905
1811	284.509	284.51	283.739	284.042	283.998	284.628	286.015	285.914	284.194
1812	284.811	284.538	284.928	284.951	285.089	284.682	286.023	286.464	284.357
1813	284.856	285.02	284.606	284.714	284.658	284.669	286.363	286.732	284.595
1814	285.16	284.83	284.364	284.769	285.064	284.604	285.93	286.58	284.382
1815	284.294	284.611	284.722	284.831	284.861	284.6	286.339	286.287	284.442
1816	284.57	284.551	284.538	282.948	283.274	282.185	285.484	285.392	283.602
1817	284.687	284.781	284.694	283.411	283.501	283.472	285.629	285.757	284.509
1818	284.808	284.884	284.45	284.006	283.997	284.272	285.77	286.373	284.402
1819	284.817	285.558	285.11	284.041	284.683	284.256	285.985	286.629	284.754
1820	285.322	285.232	285.341	284.768	284.332	284.553	286.11	286.838	285.18
1821	284.955	285.29	285.256	284.813	284.5	284.358	285.821	286.488	284.709
1822	285.052	285.215	285.452	284.771	284.525	284.532	285.68	286.782	284.567
1823	285.38	285.586	285.433	285.093	285.105	284.325	285.518	286.599	284.672
1824	285.221	285.508	285.157	284.769	284.761	284.807	285.594	286.815	284.083
1825	284.481	284.971	285.309	284.907	284.427	284.426	286.111	286.459	284.137
1826	284.547	285.168	285.033	284.613	284.926	284.819	286.235	287.164	284.707
1827	284.901	284.936	285.015	284.733	284.83	284.077	286.385	286.786	284.562
1828	284.841	285.698	285.088	284.401	285.092	284.882	285.916	286.876	284.088
1829	285.205	285.273	285.172	284.56	284.764	284.729	285.904	286.567	284.376
1830	284.947	285.359	285.116	284.931	284.839	284.736	286.038	286.743	284.169
1831	284.727	284.69	285.317	285.061	284.231	284.709	284.157	286.088	283.999
1832	283.783	283.939	284.616	283.051	284.259	284.047	284.935	286.102	283.42
1833	284.904	284.779	285.089	283.702	284.559	284.033	285.622	286.646	284.217
1834	284.954	284.968	285.083	284.046	285.169	284.247	285.743	286.545	284.296
1835	282.945	284.034	283.654	283.593	284.423	284.375	285.085	286.09	284.504
1836	283.701	283.805	284.213	283.246	283.466	284.595	284.743	286.407	283.952
1837	284.476	284.776	284.955	284.307	284.121	284.804	285.768	286.646	284.178
1838	285.12	284.546	284.58	284.691	284.758	284.639	285.318	286.695	285.071
1839	284.889	284.838	284.743	284.74	285.057	284.447	286.012	287.069	284.289
1840	285.49	284.99	284.985	284.437	284.795	284.615	285.778	286.97	285.068
1841	285.298	285.123	285.361	285.008	284.818	284.762	285.612	287.041	285.092
1842	285.122	284.426	285.379	284.978	285.241	284.571	285.934	286.836	284.47
1843	285.378	285.123	285.354	285.118	284.542	284.576	285.894	286.815	284.446
1844	284.984	285.541	285.541	285.619	284.253	284.688	286.379	286.745	284.458
1845	285.555	285.331	285.079	284.529	284.761	284.58	286	287.024	284.651
1846	285.051	284.839	285.254	284.941	284.966	284.337	286.784	287.054	284.693
1847	285.319	284.892	285.463	285.436	284.752	284.547	286.156	286.777	284.284
1848	284.833	284.506	285.027	284.89	285.175	285.211	285.921	286.783	284.231
1849	285.095	284.897	285.286	285.171	285.024	284.602	285.746	287.06	285.212
